# Supplementary material for: Genome-Wide Association Study Identifies Novel Loci Associated with Circulating Phospho- and Sphingolipid Concentrations
Source: PubMed Central journal article supplement (PMC3280968; doi:10.1371/journal.pgen.1002490), 2012-02-16

Figure S1

Glu-CER 16:0

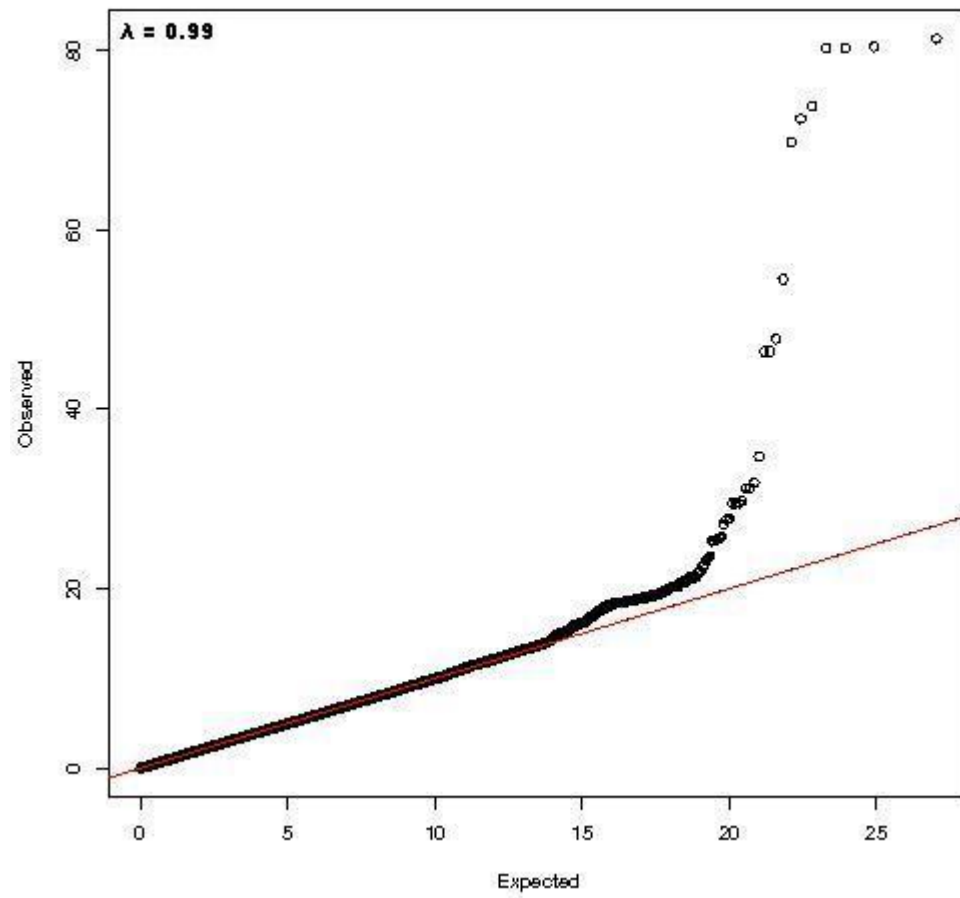

% CER 16:0

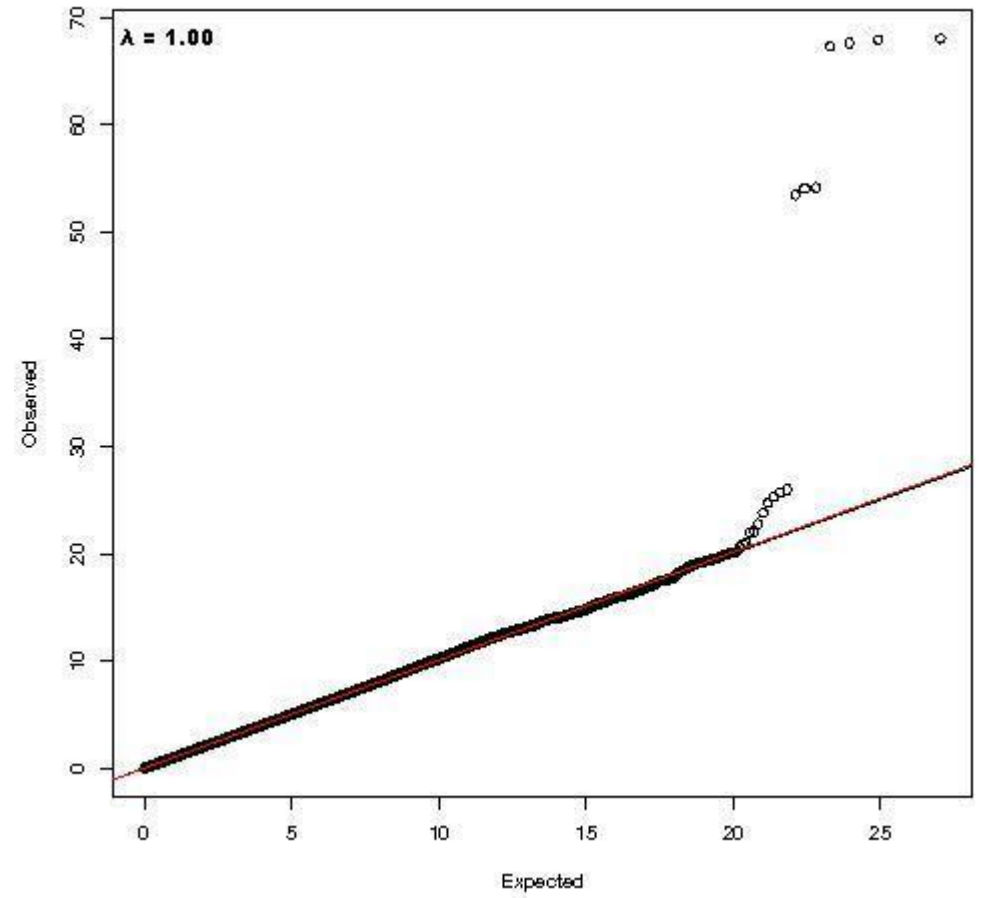

% CER 18:0

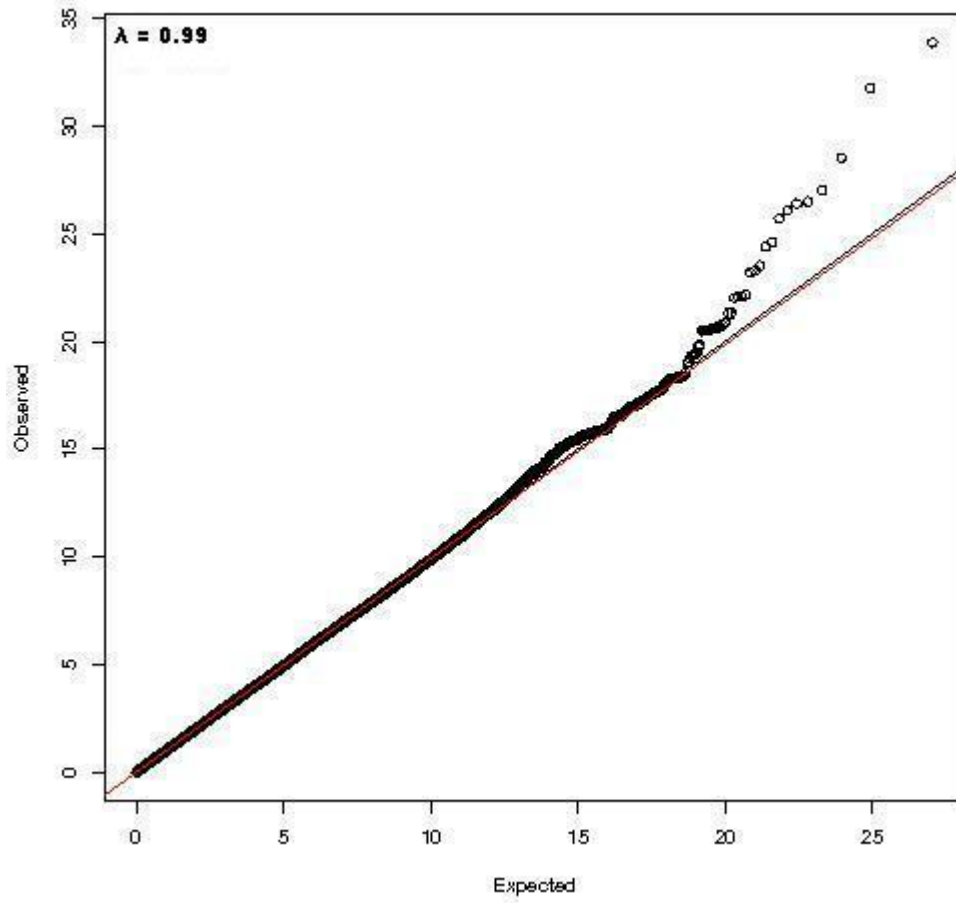

% Glu-CER 24:1

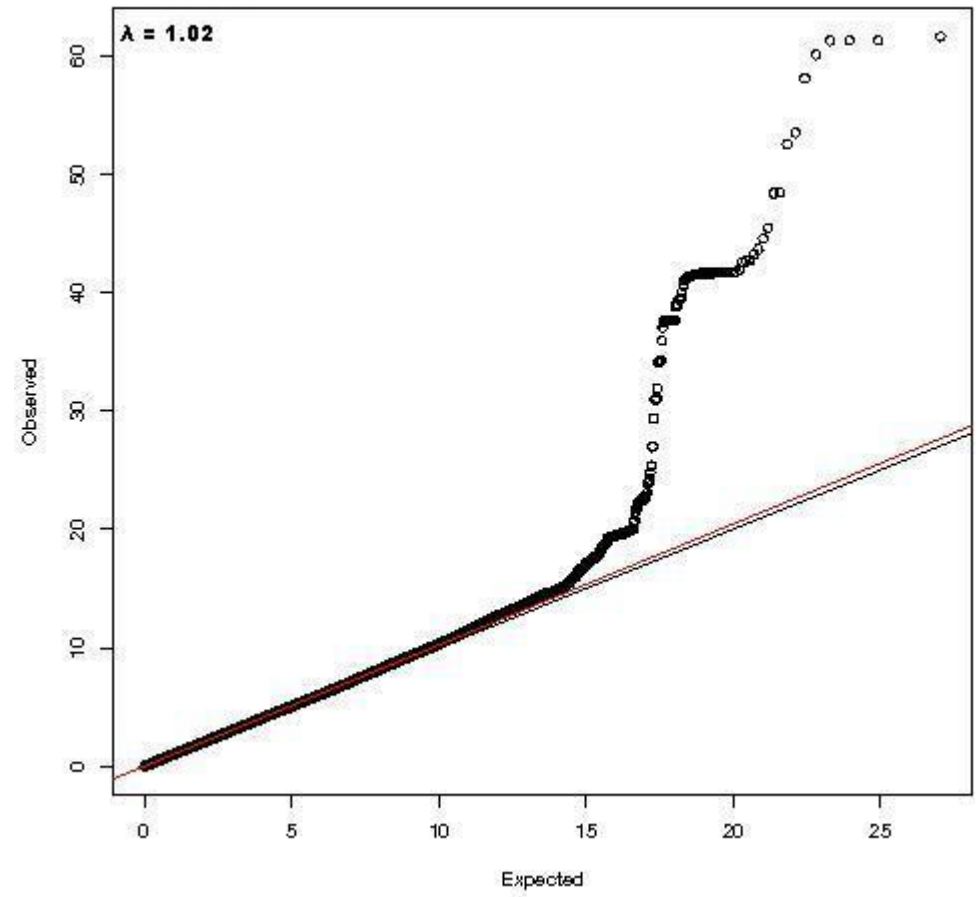

% LPC 16:1

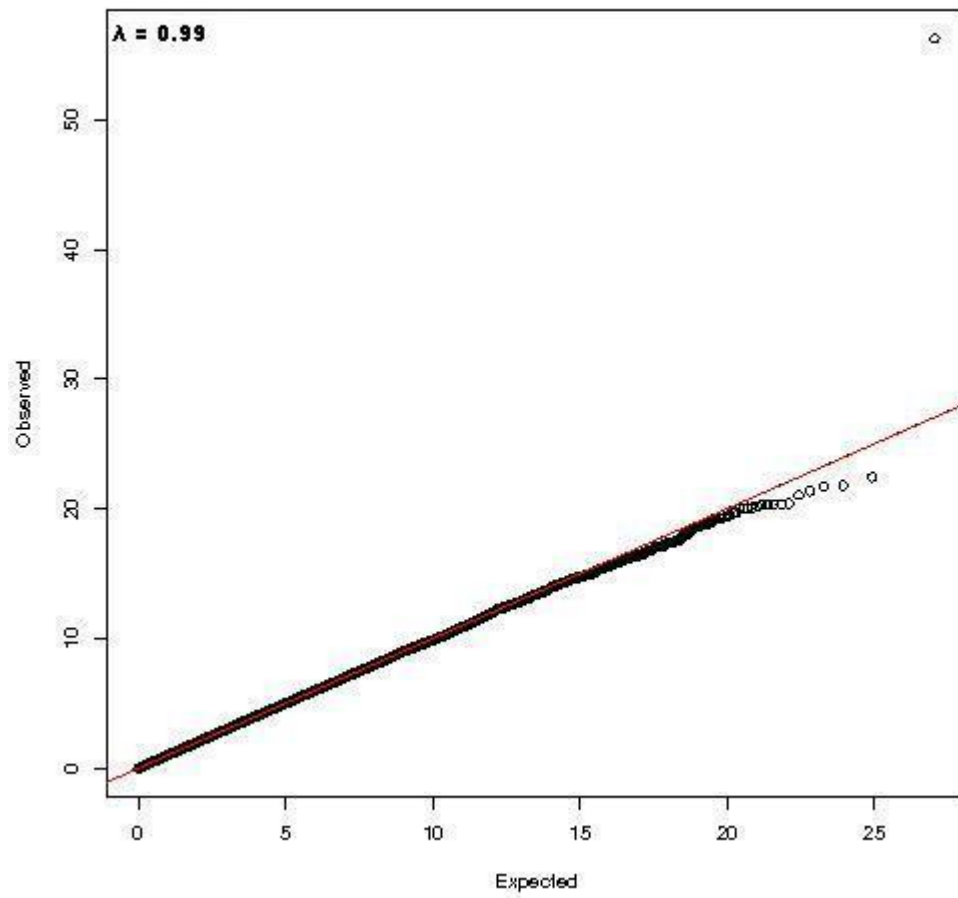

% LPC 18:0

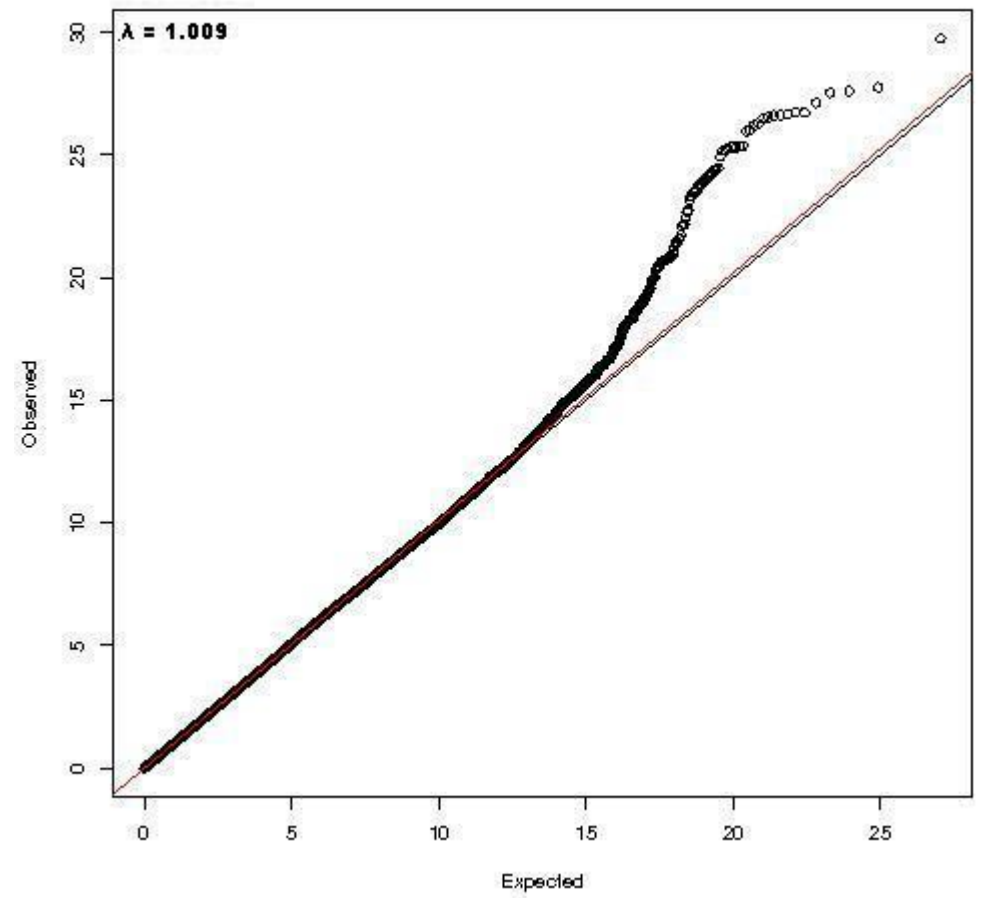

% LPC 20 :3

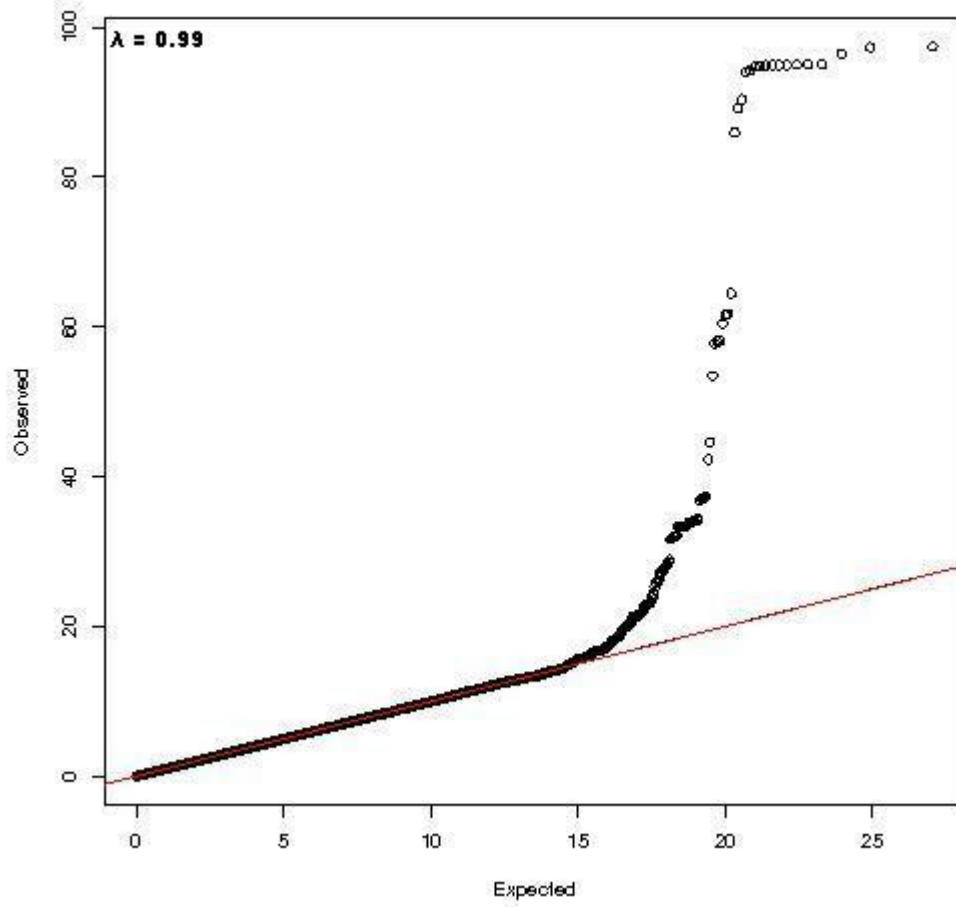

% Saturated LPC

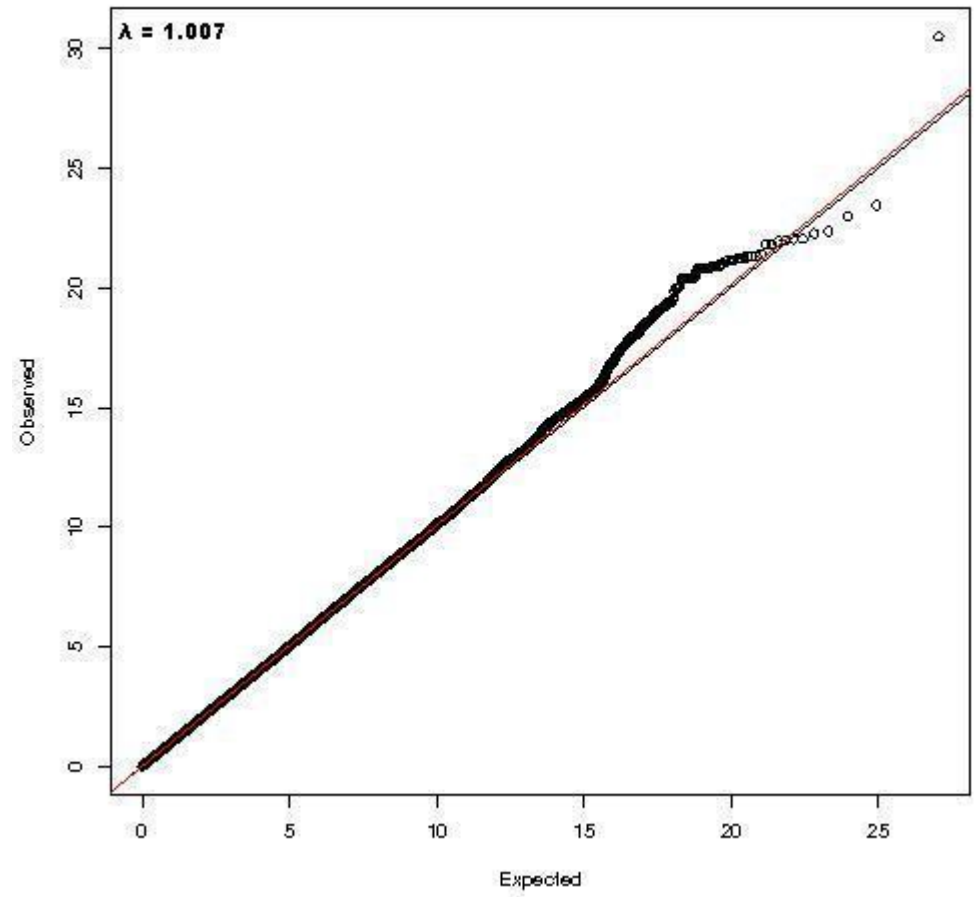

PC 30 :1

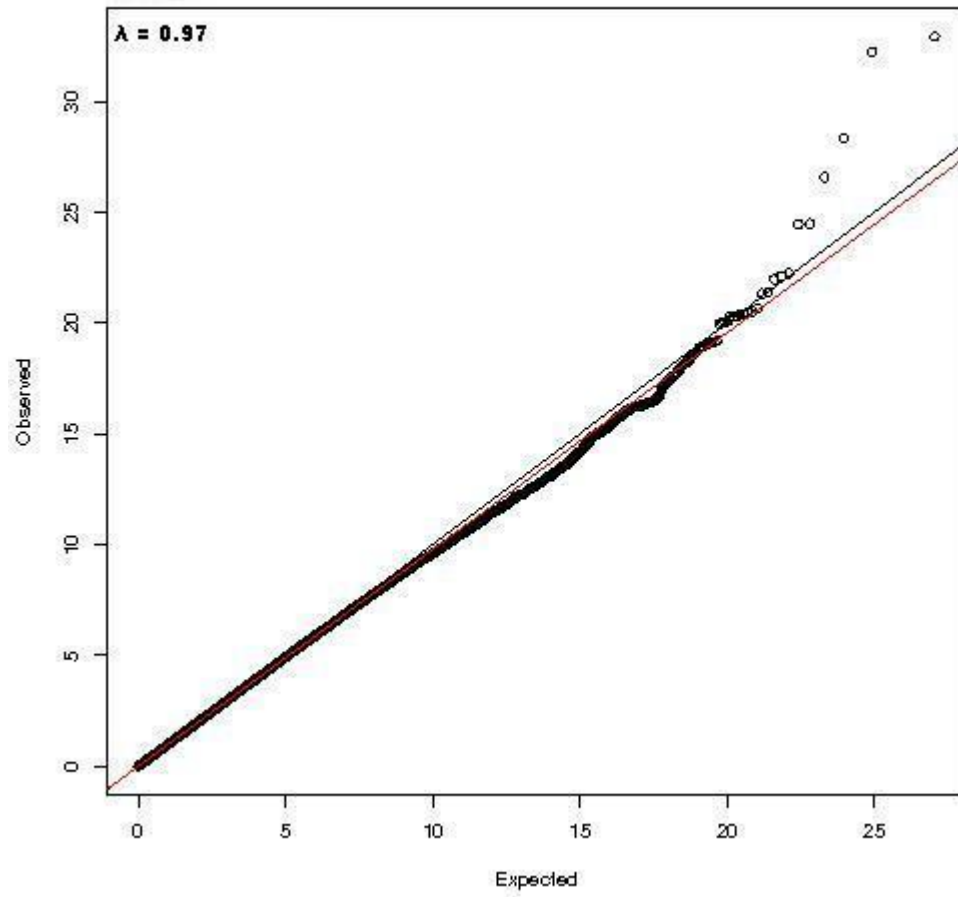

PC O 32 :1

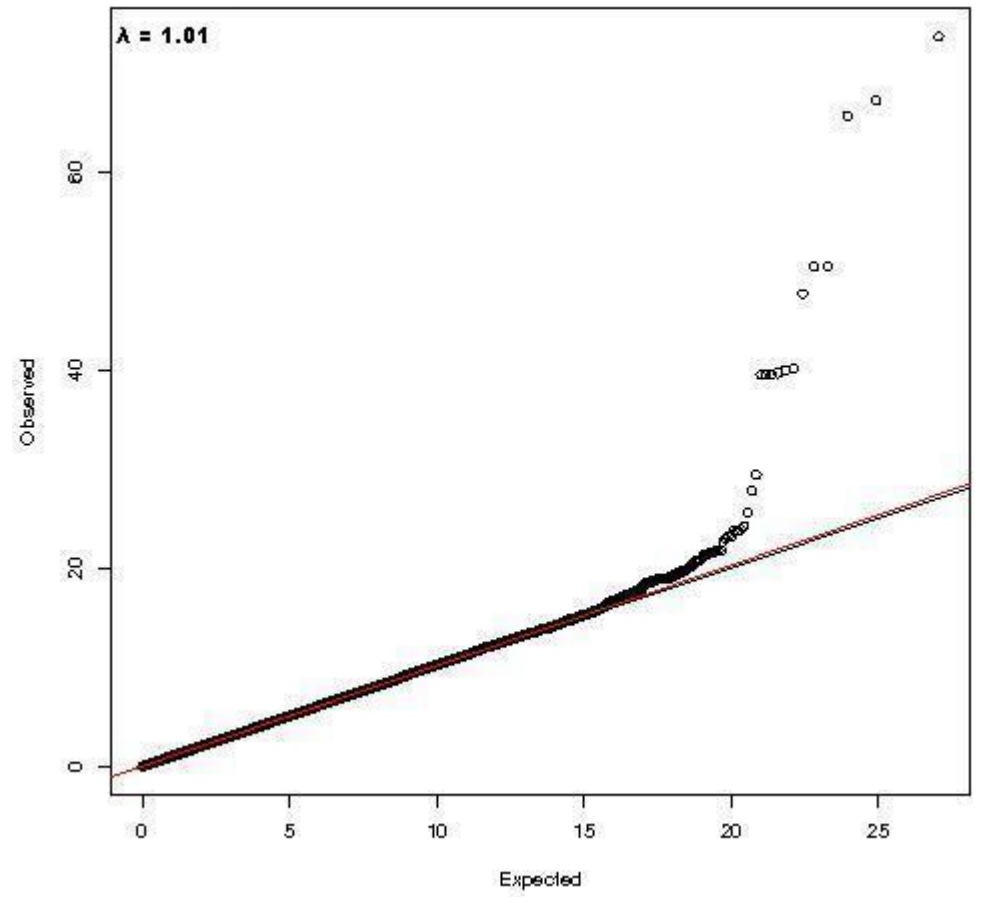

PC 32:1

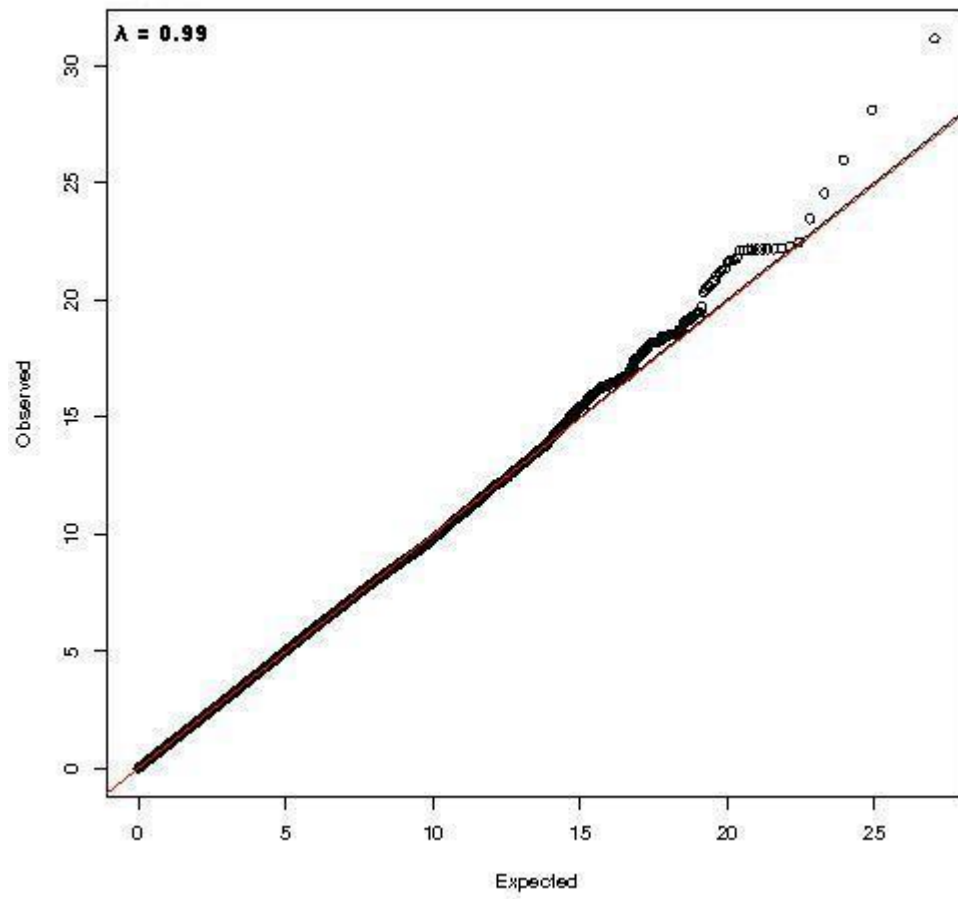

PC 34:4

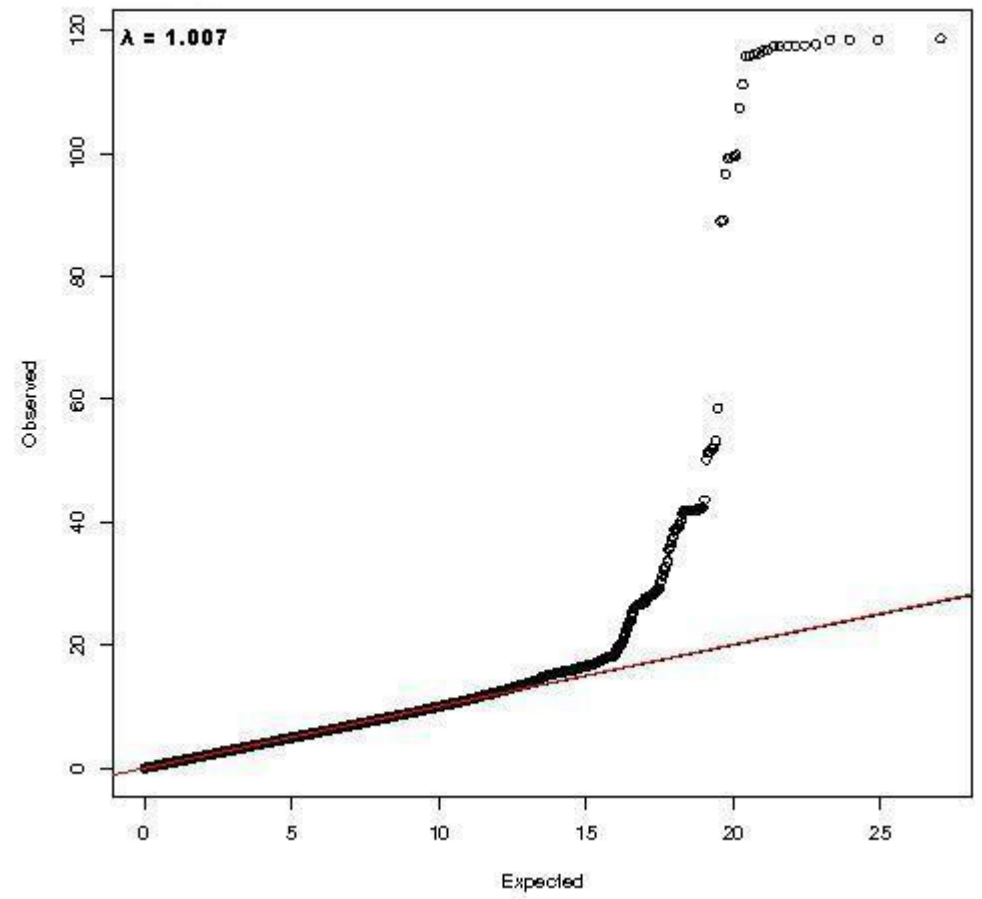

PC 40:3

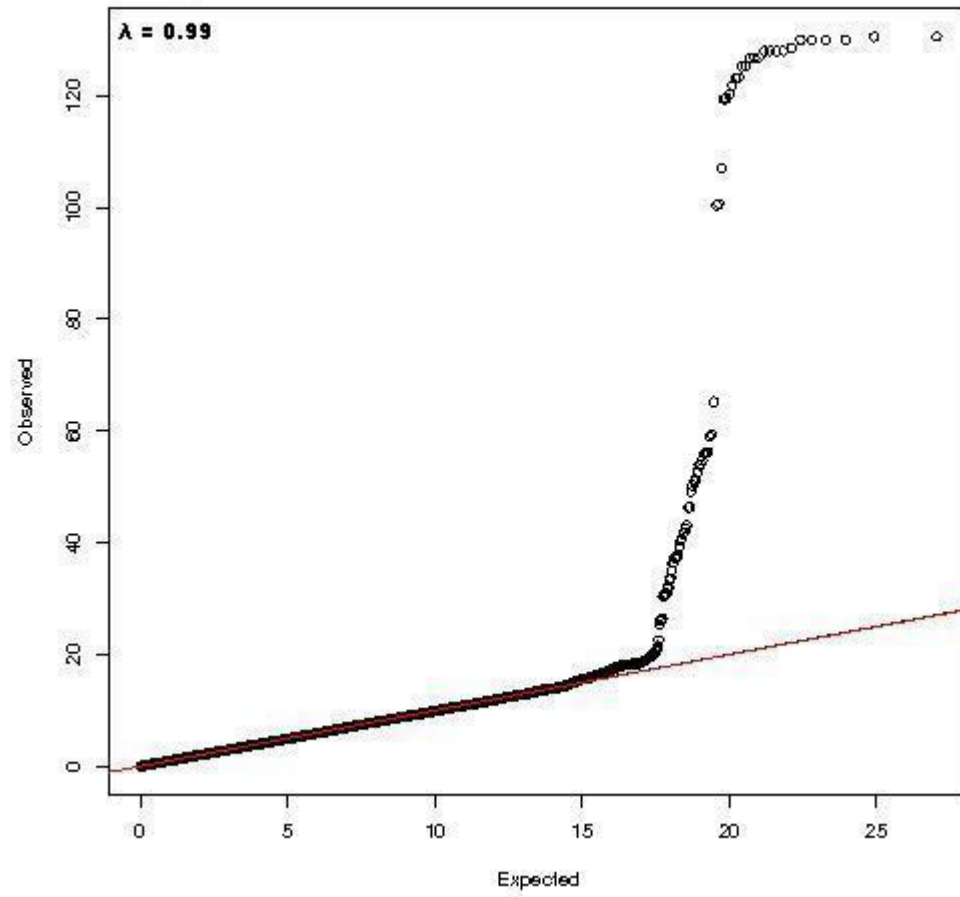

PC O 42:6

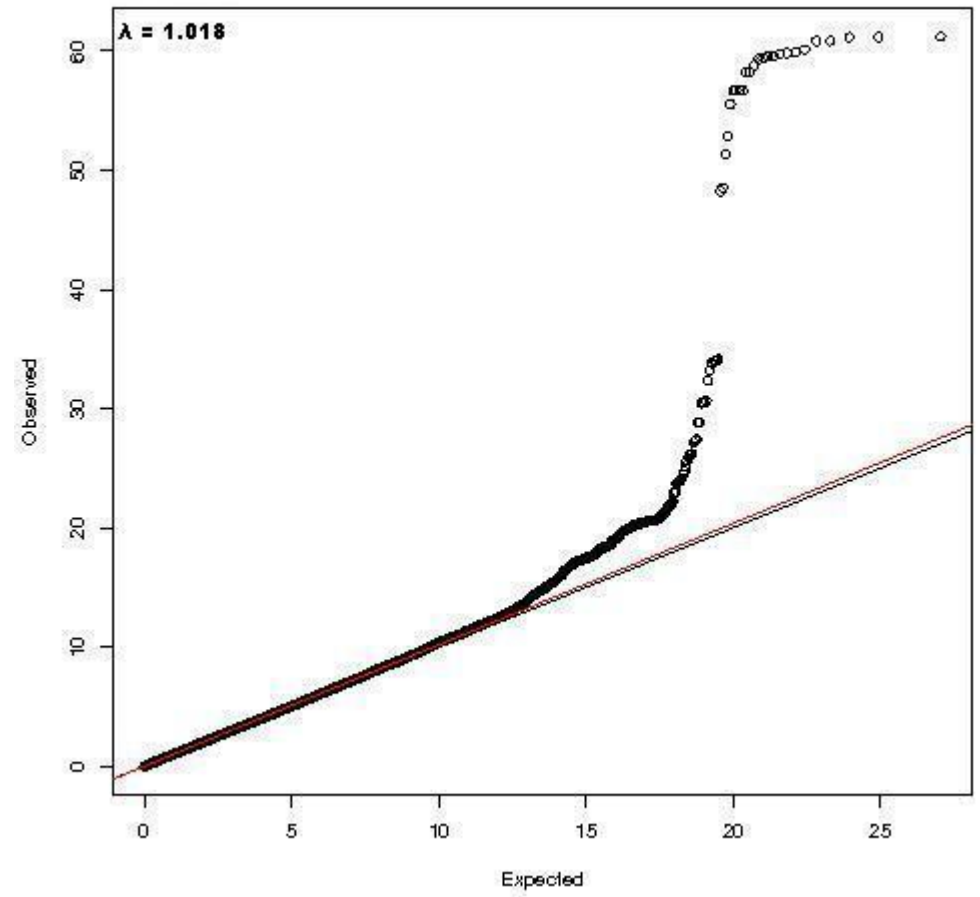

PC O 42:5

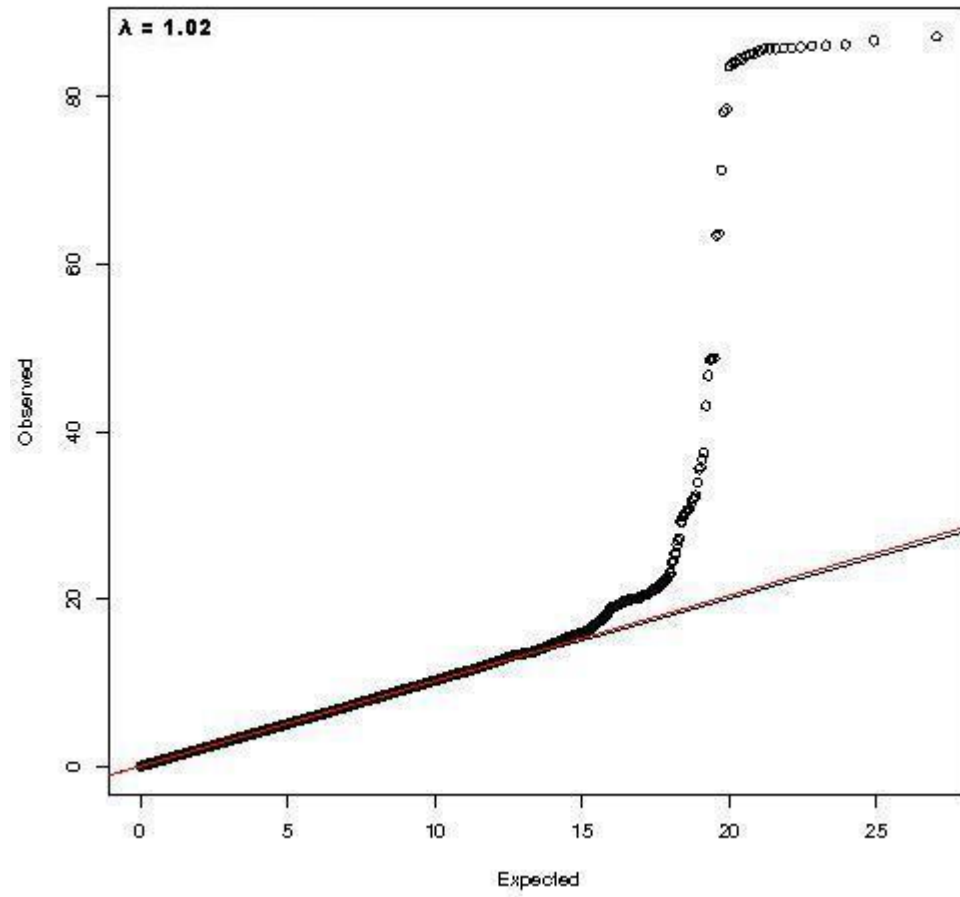

PC /LPC

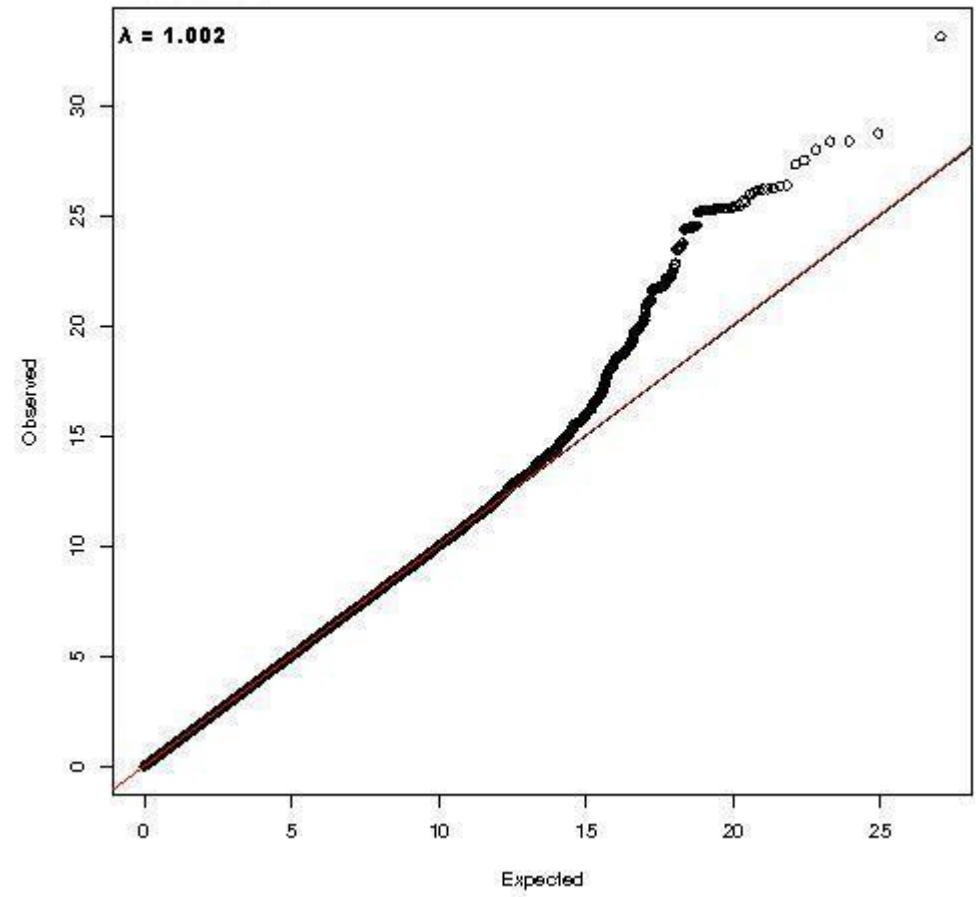



% PC O 32:0

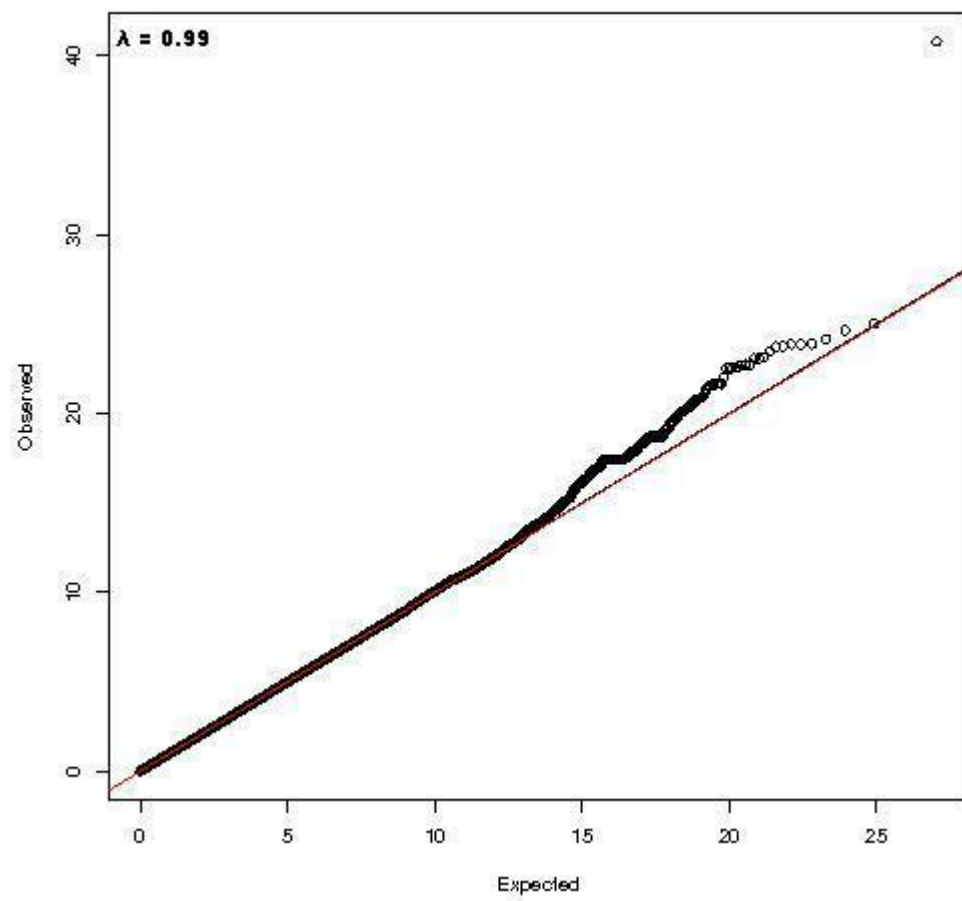

% PC 32:2

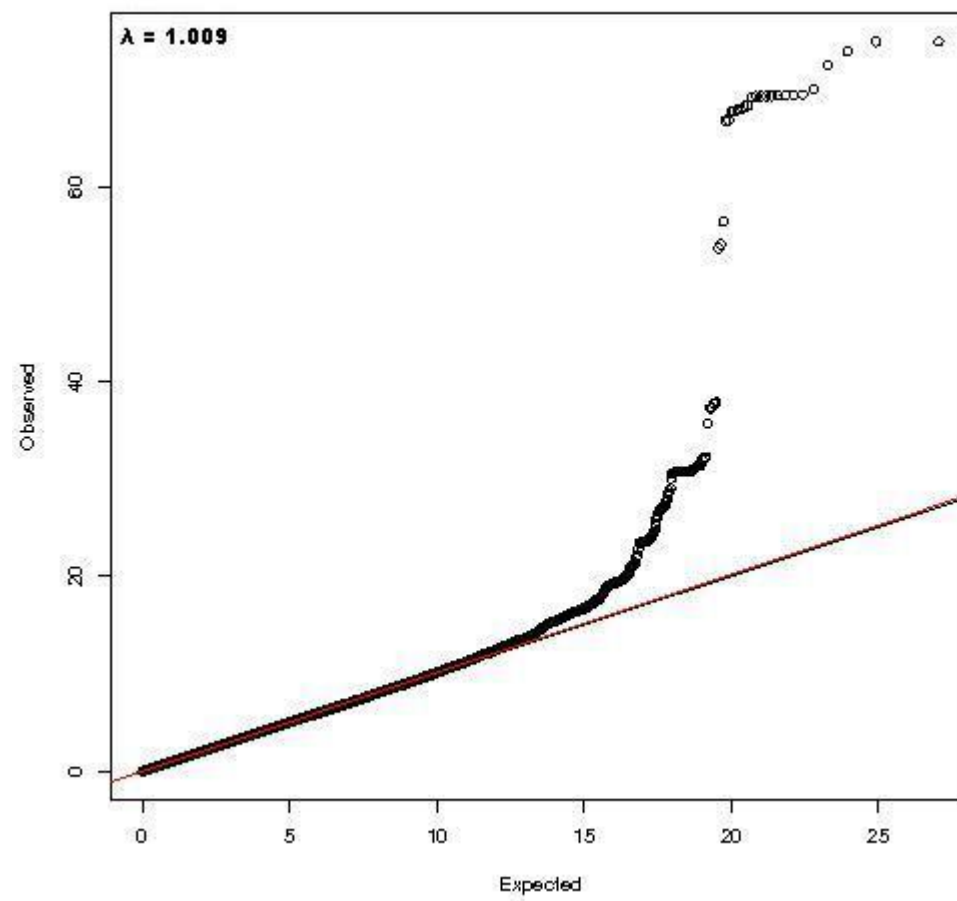

% PC 32:0

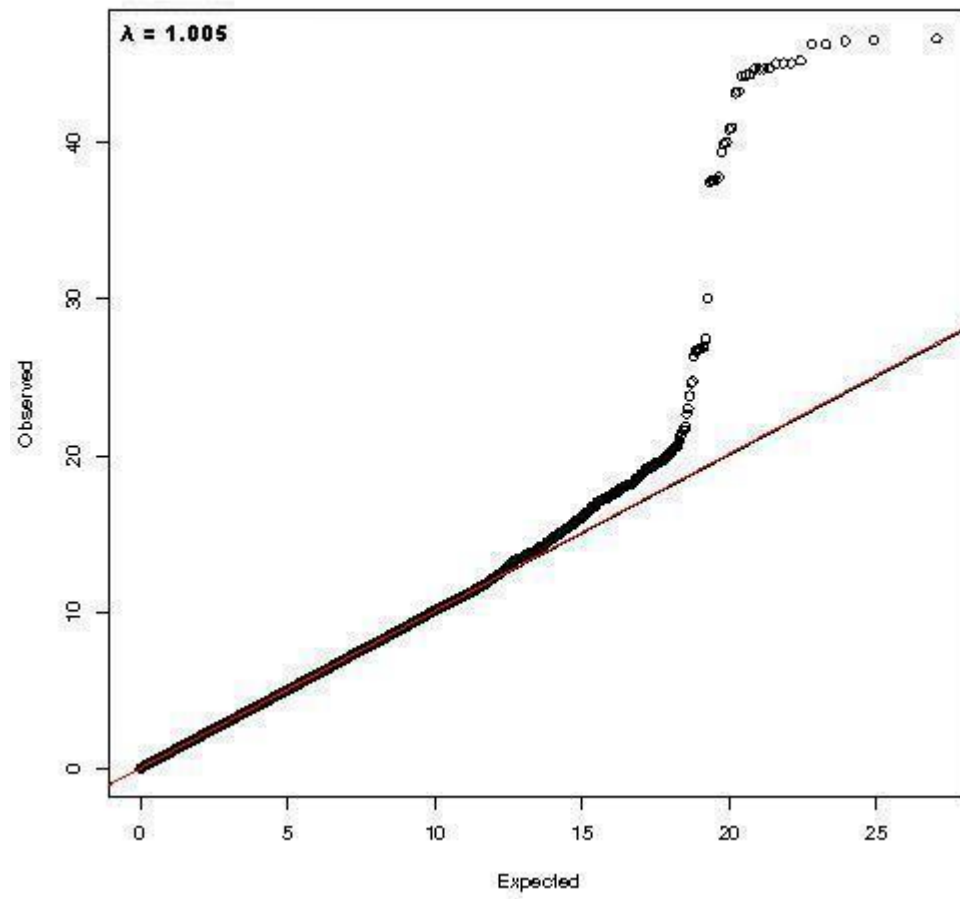

% PC O 36:5

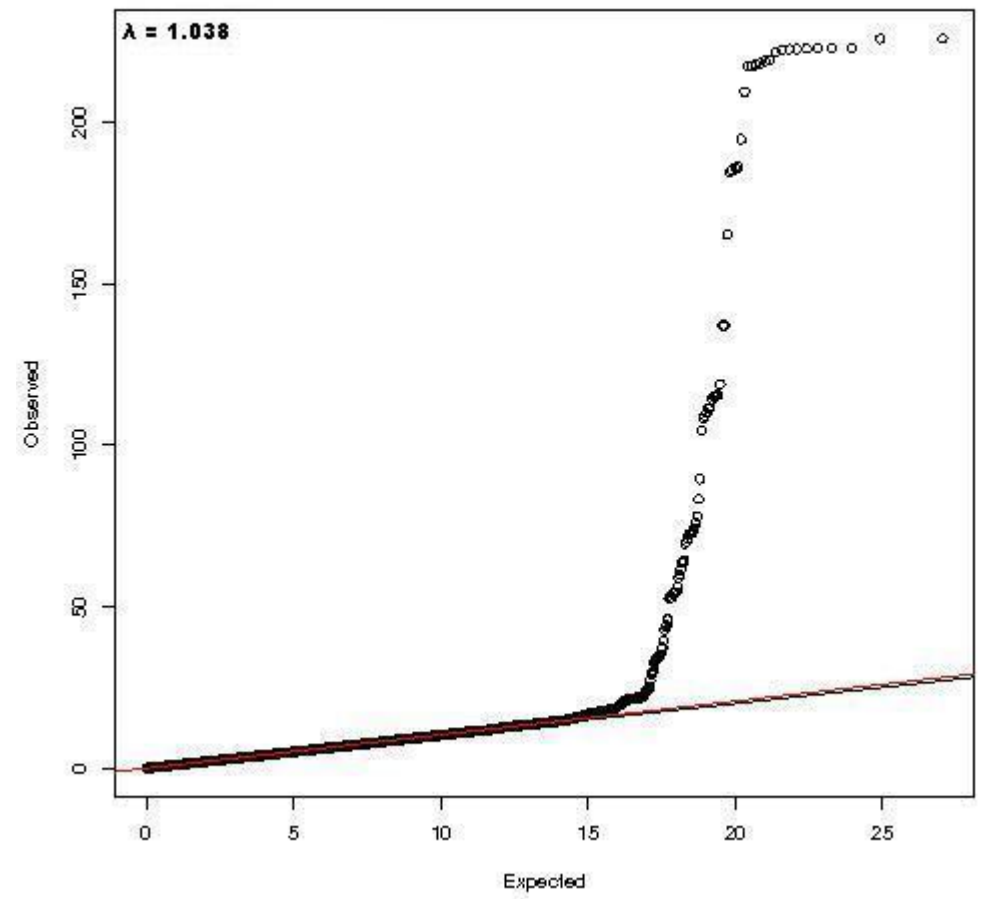

% PC 36:4

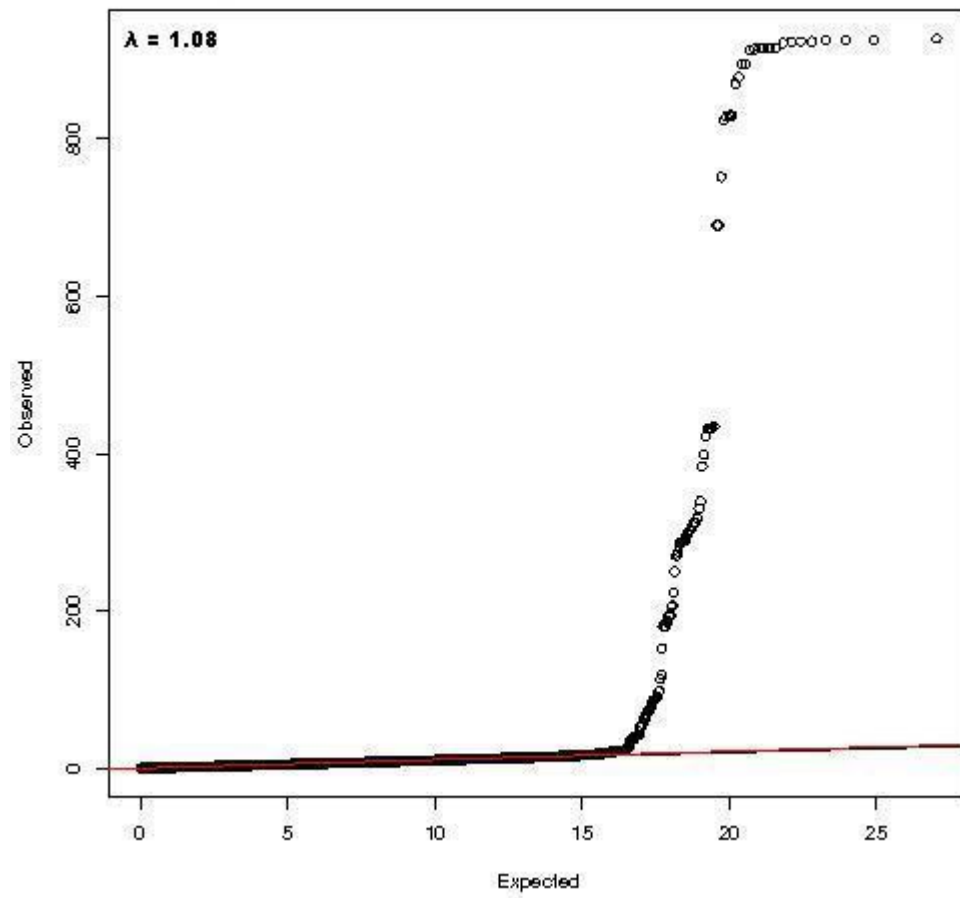

% PC 36:1

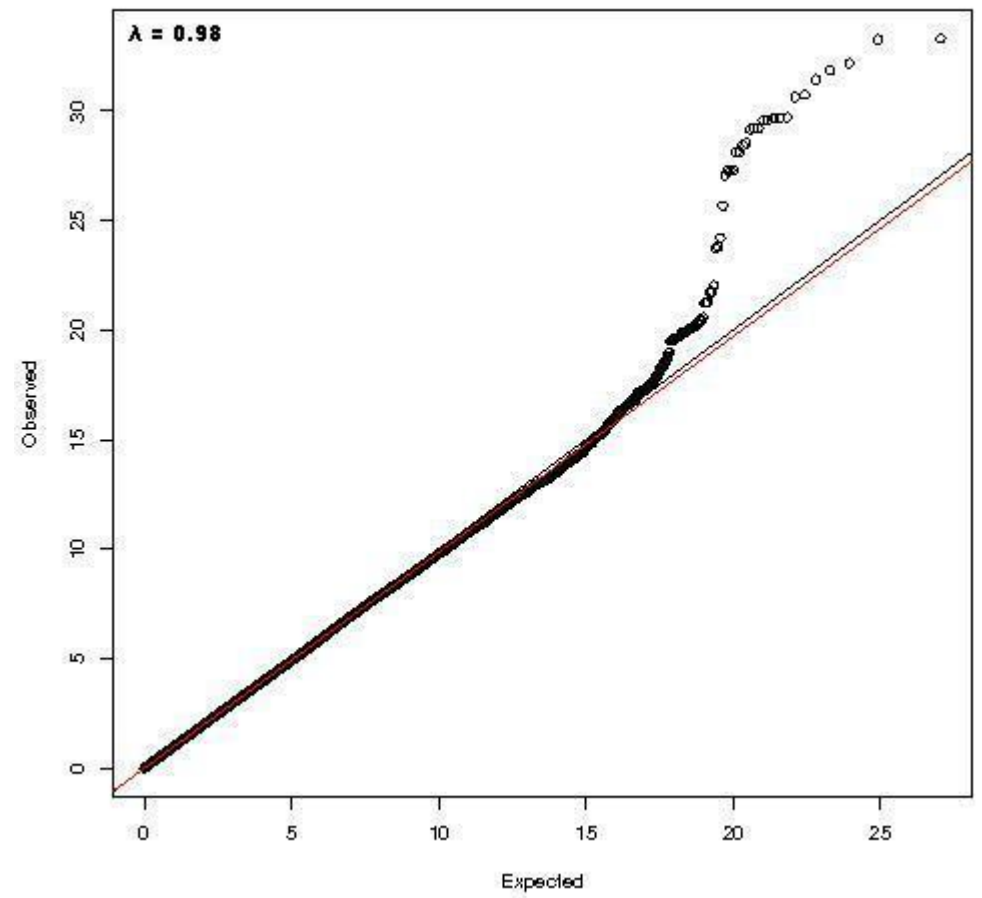

PC 38:5

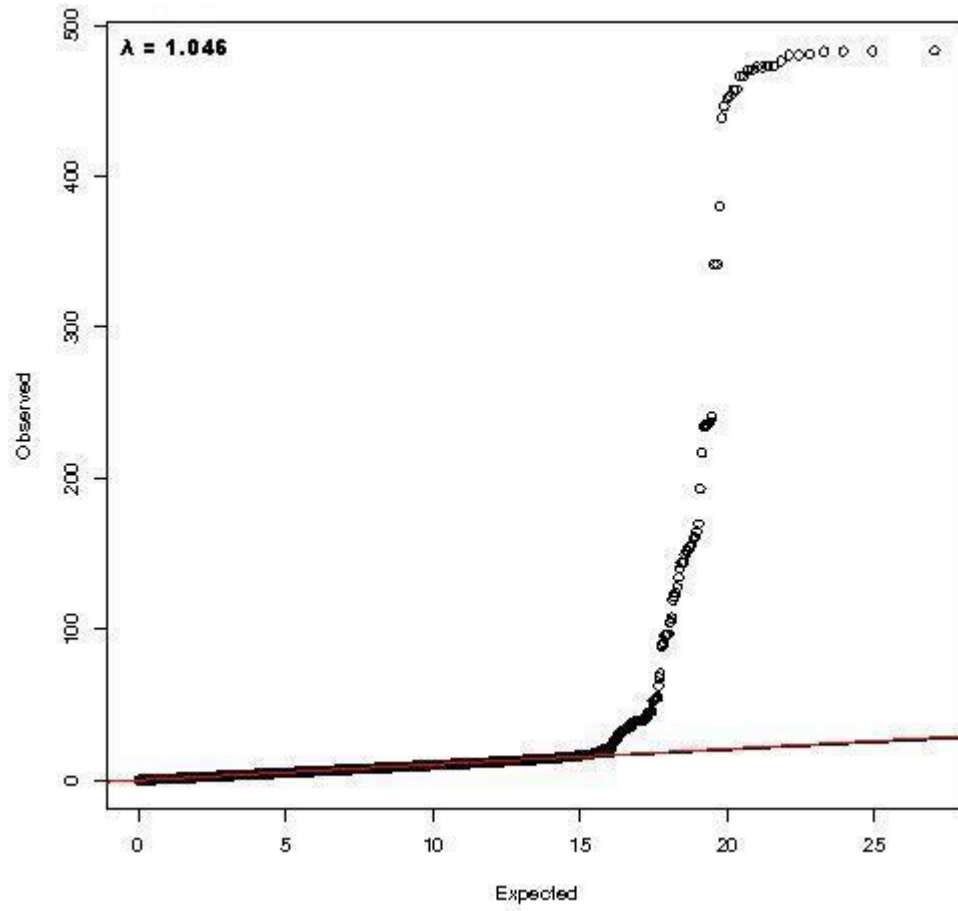

PE 36:4

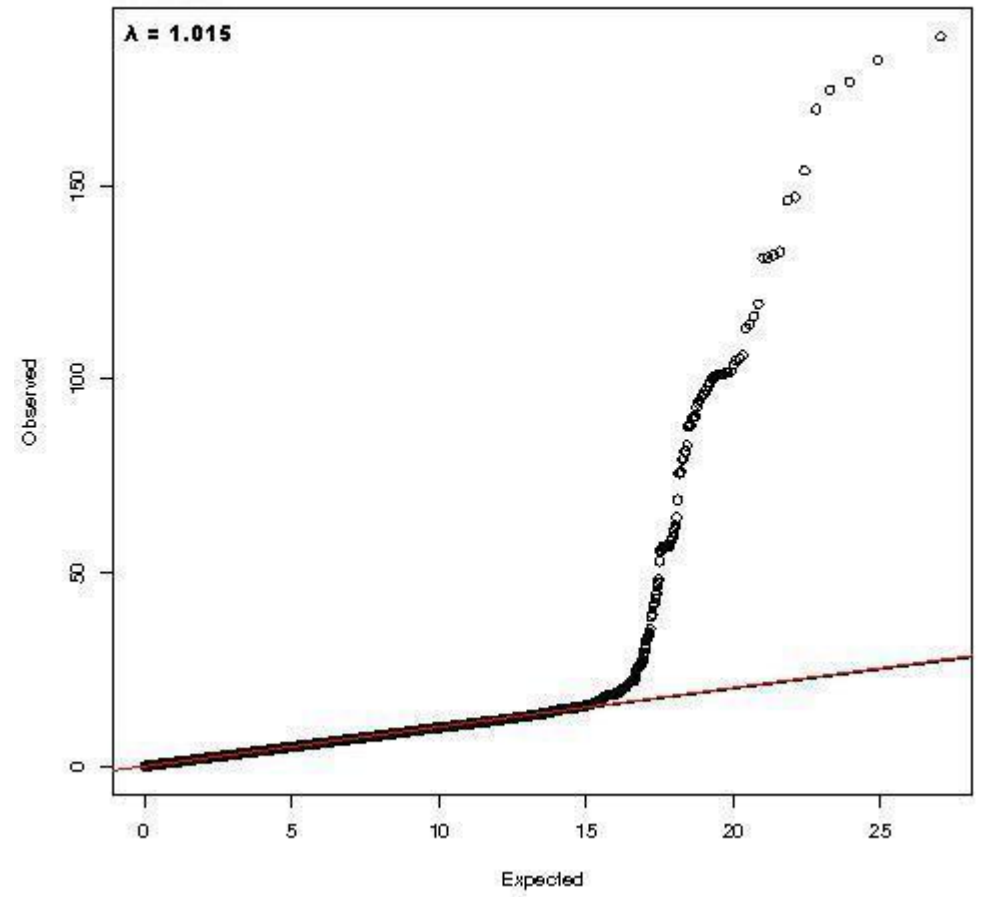

% Mono-unsaturated PE

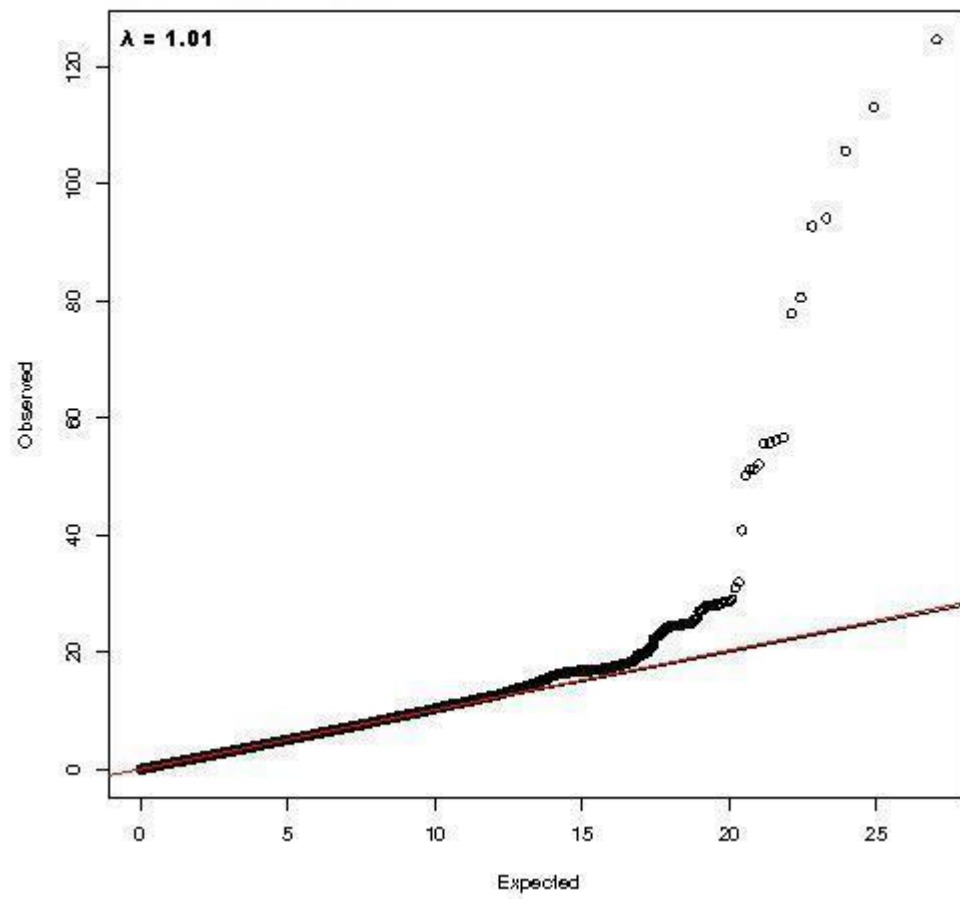

PLPE 18:0/22:6

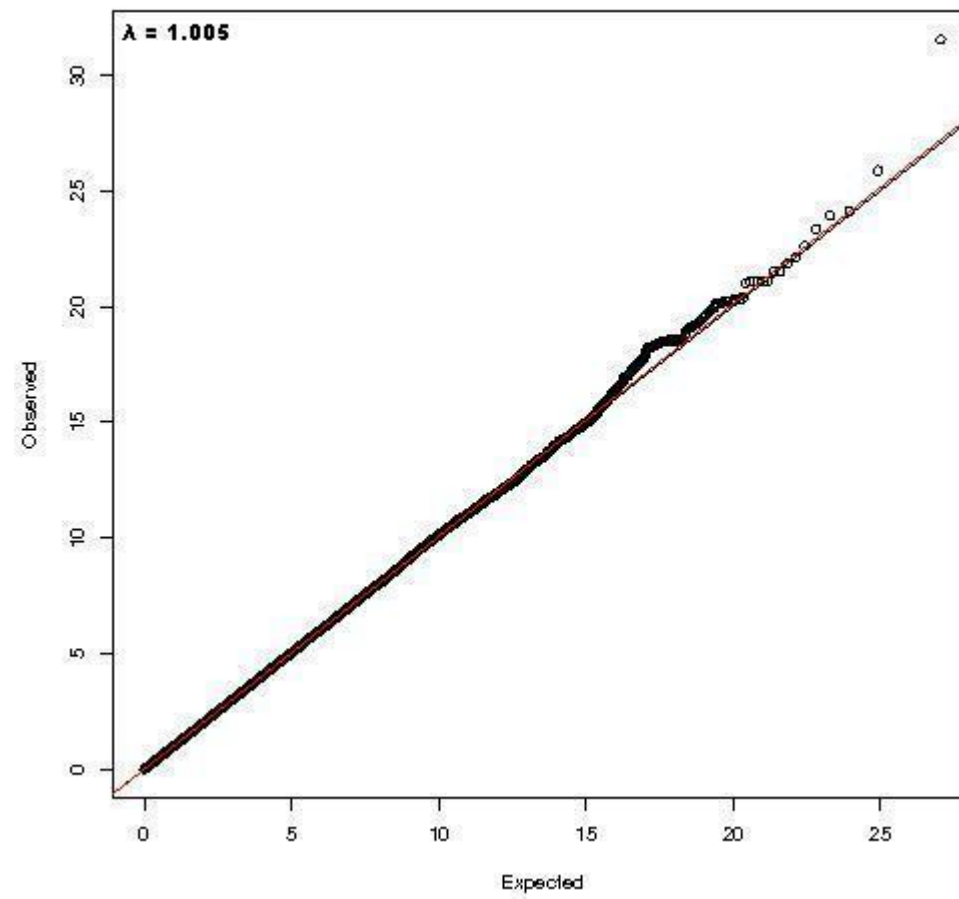

SPM 16:1

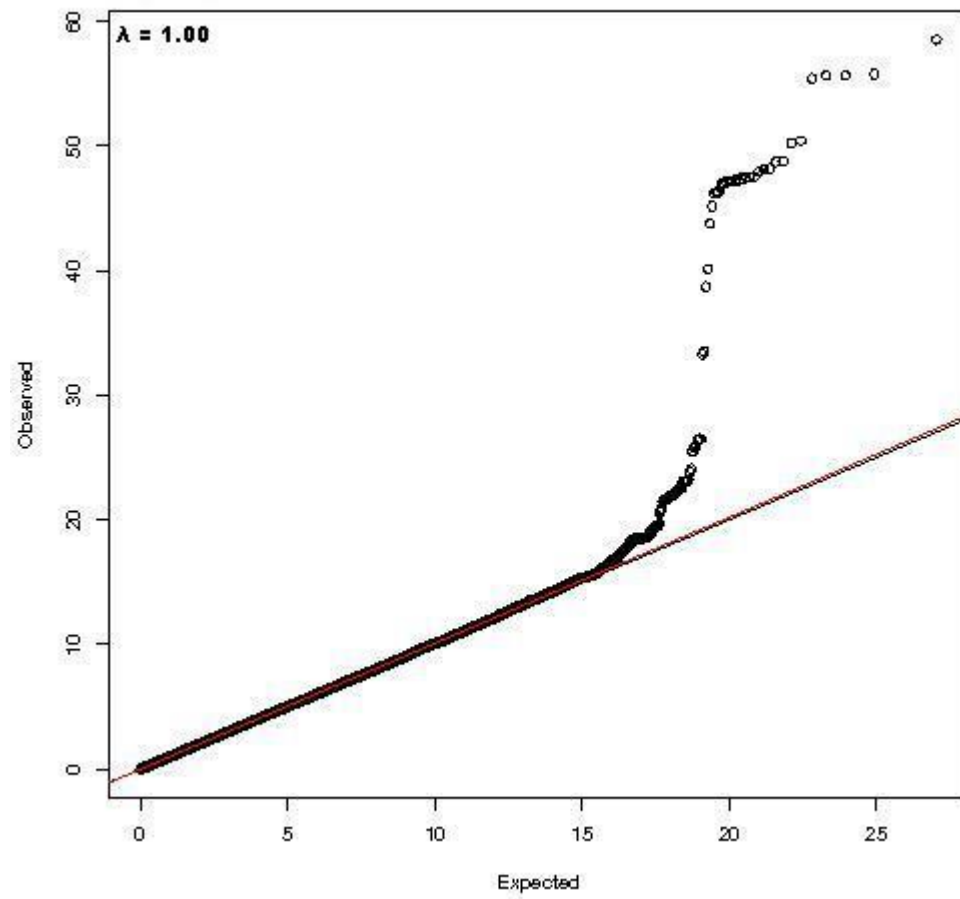

SPM 17:0

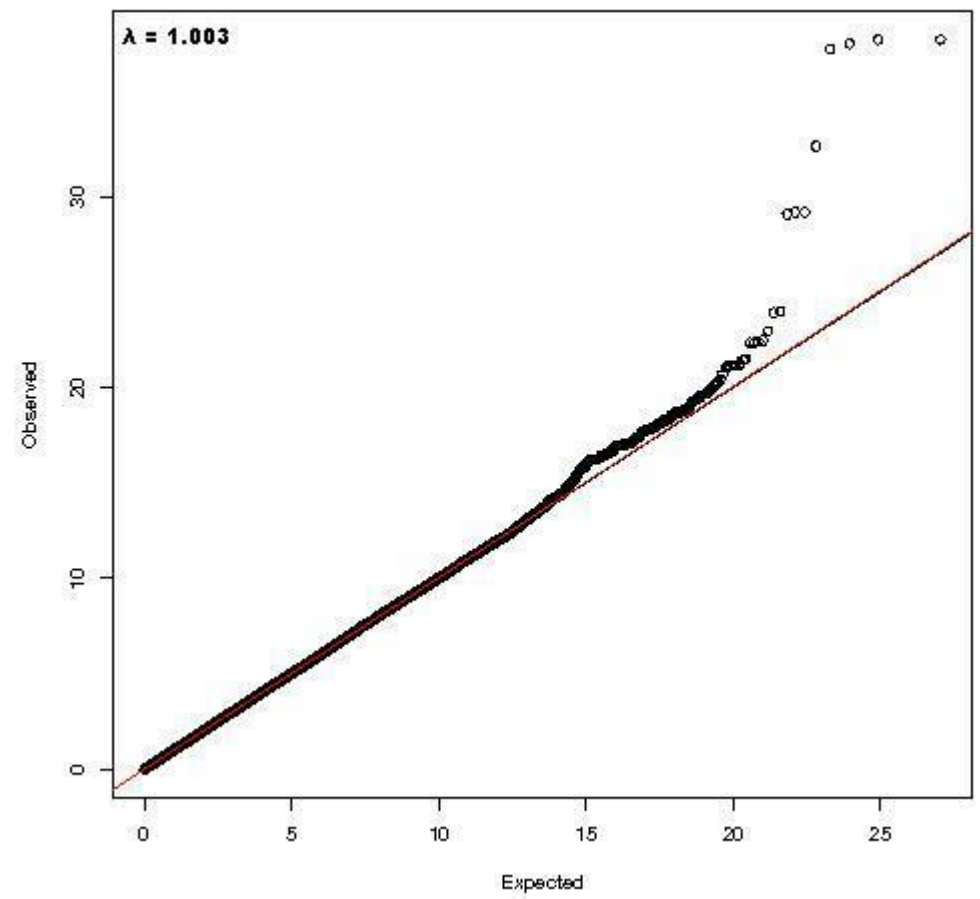

SPM 22:0

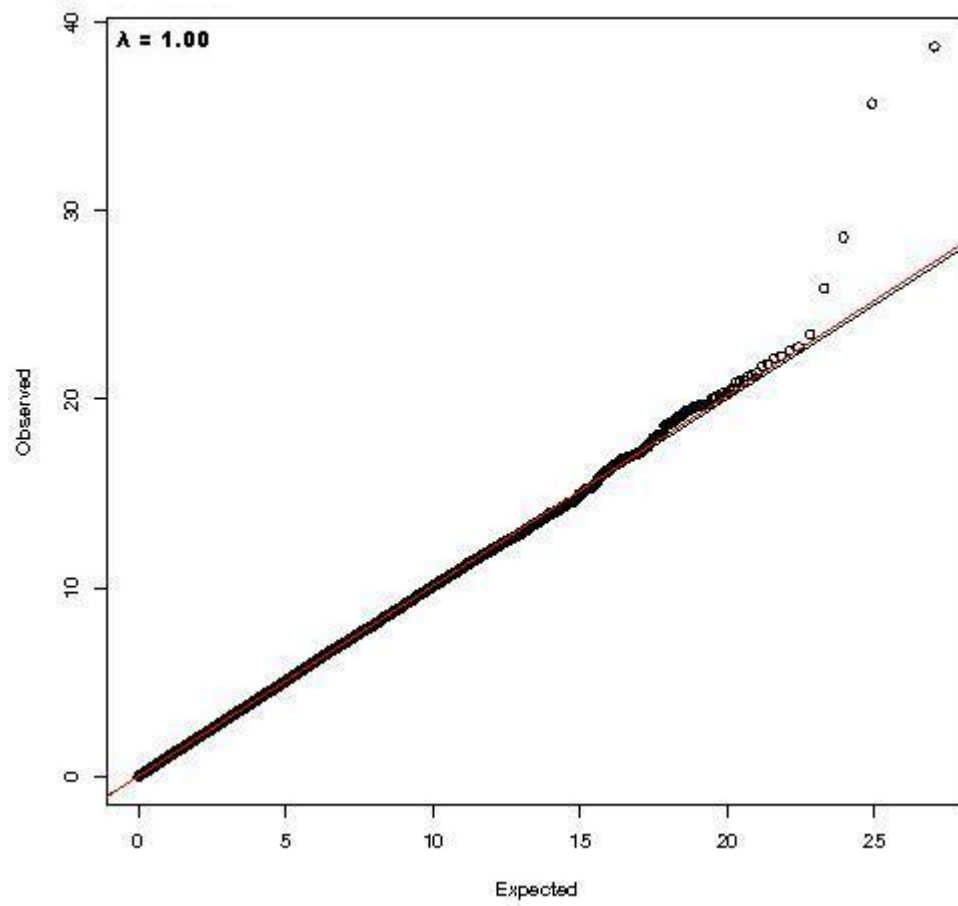

SPM 23:0

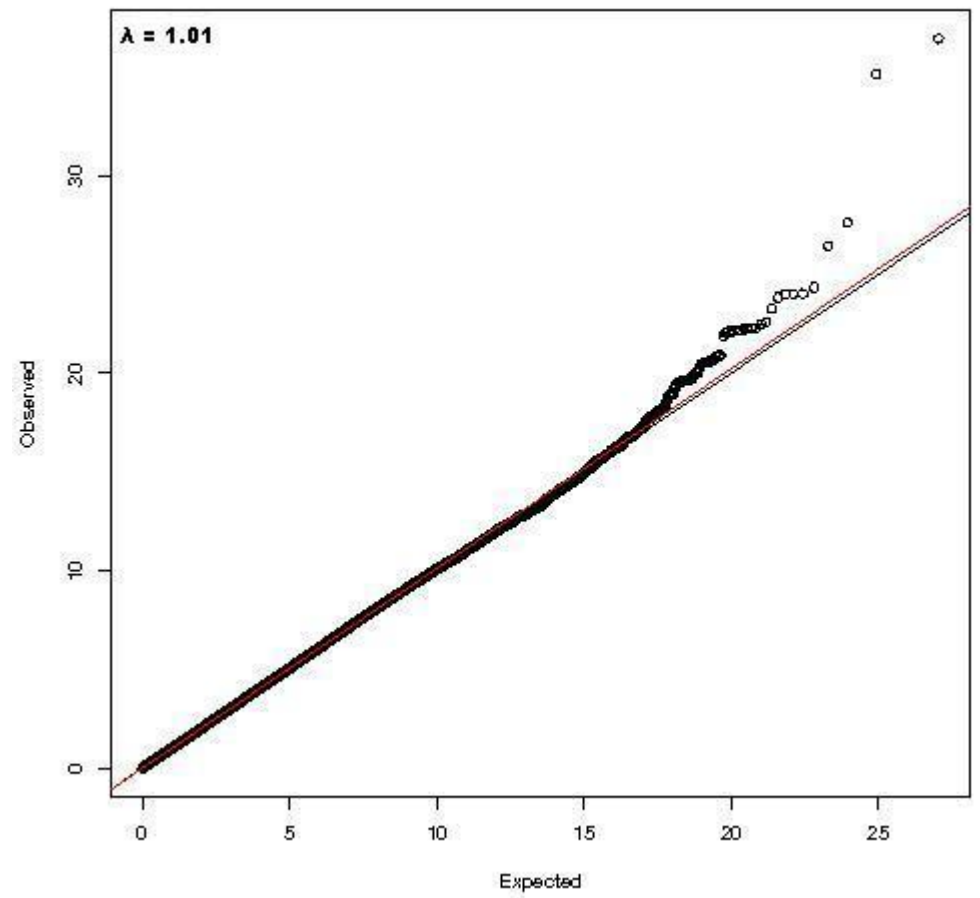

%SPM 14:0

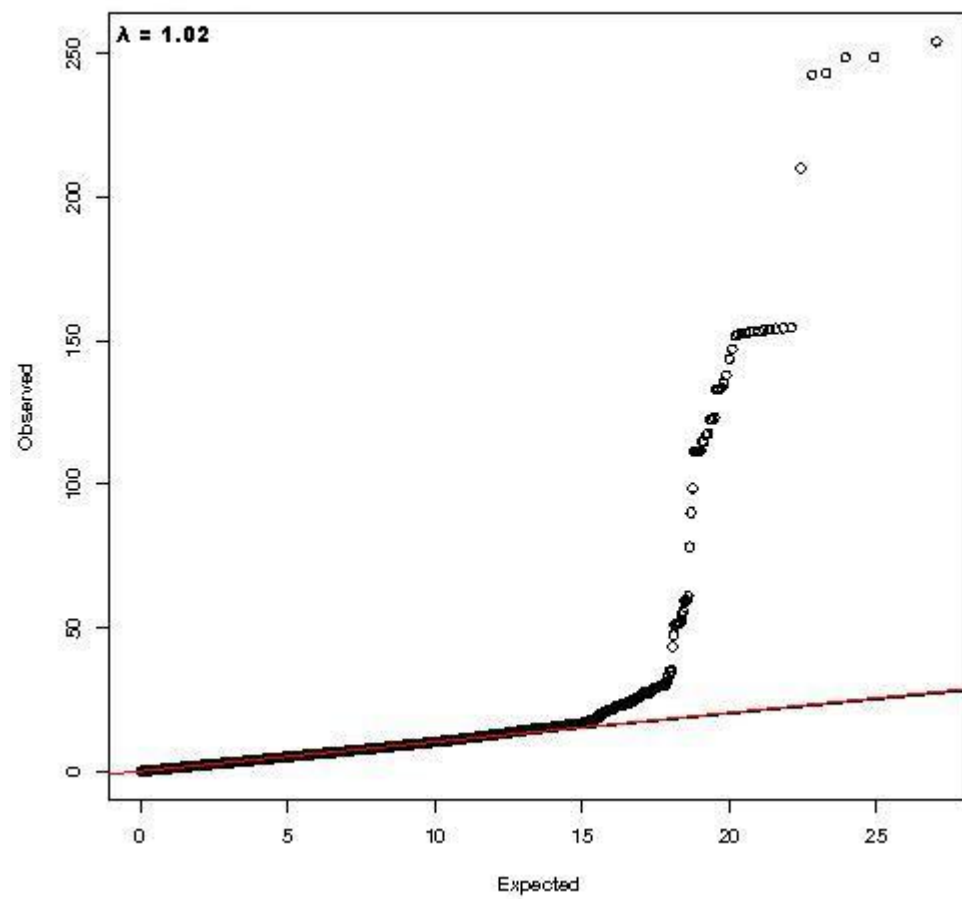

% SPM 20:1

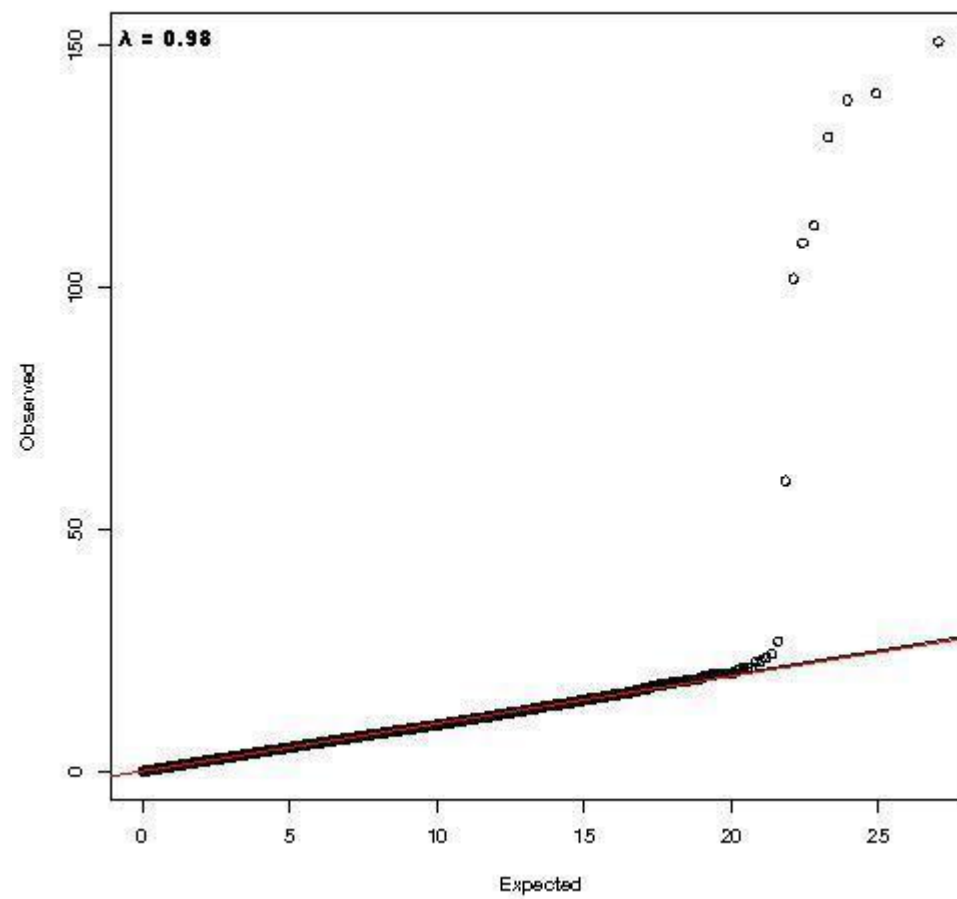

Supplement: pgen.1002490.s001.pdf [file pgen.1002490.s001.pdf]
