# Supplementary material for: Genome-Wide Association Study Identifies Novel Loci Associated with Circulating Phospho- and Sphingolipid Concentrations
Source: PubMed Central journal article supplement (PMC3280968; doi:10.1371/journal.pgen.1002490), 2012-02-16

Figure S3  
Regional association plots of sphingolipid associated loci

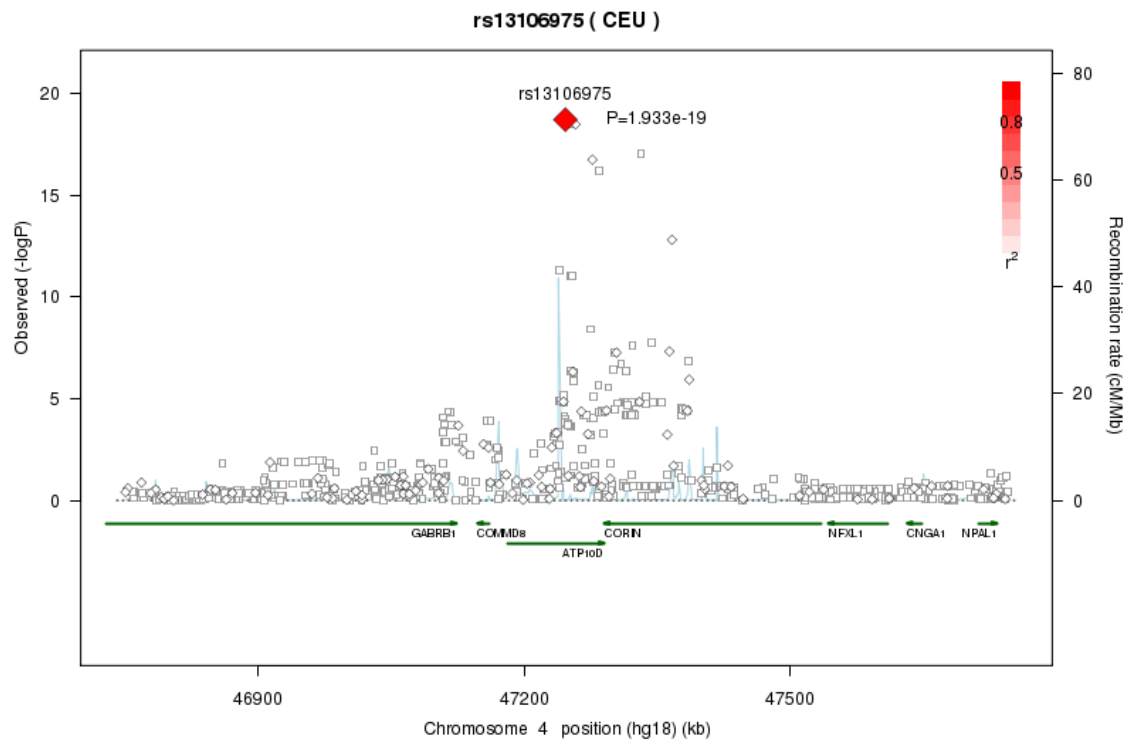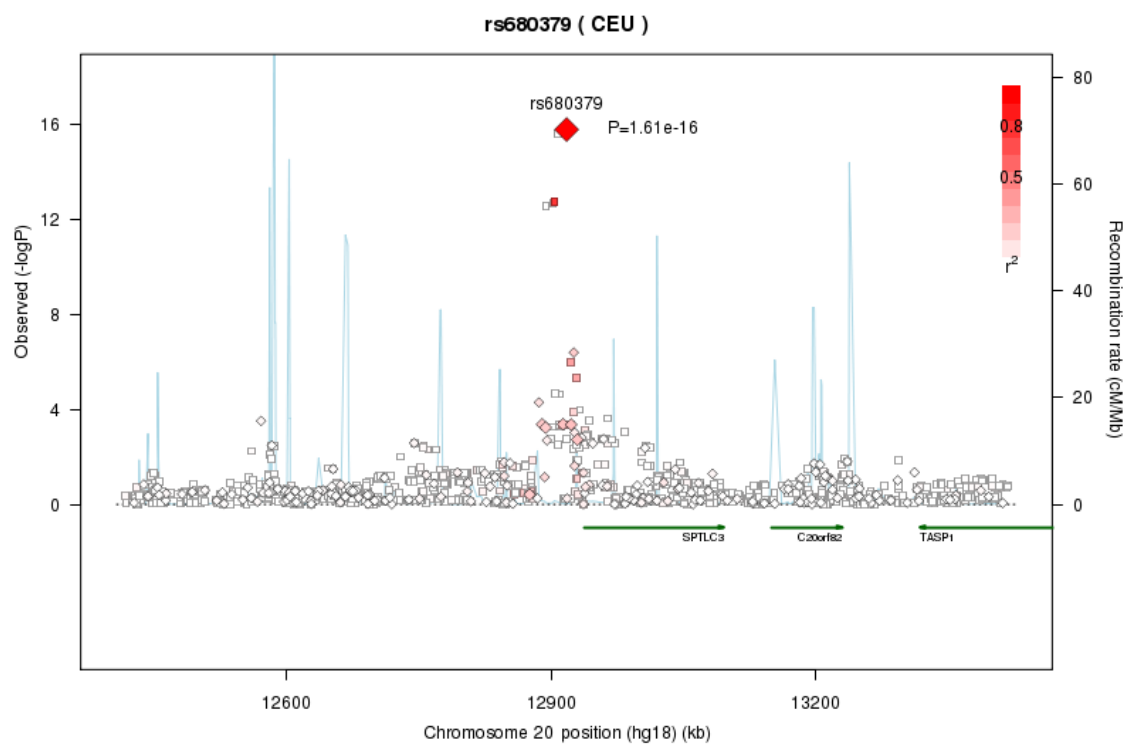

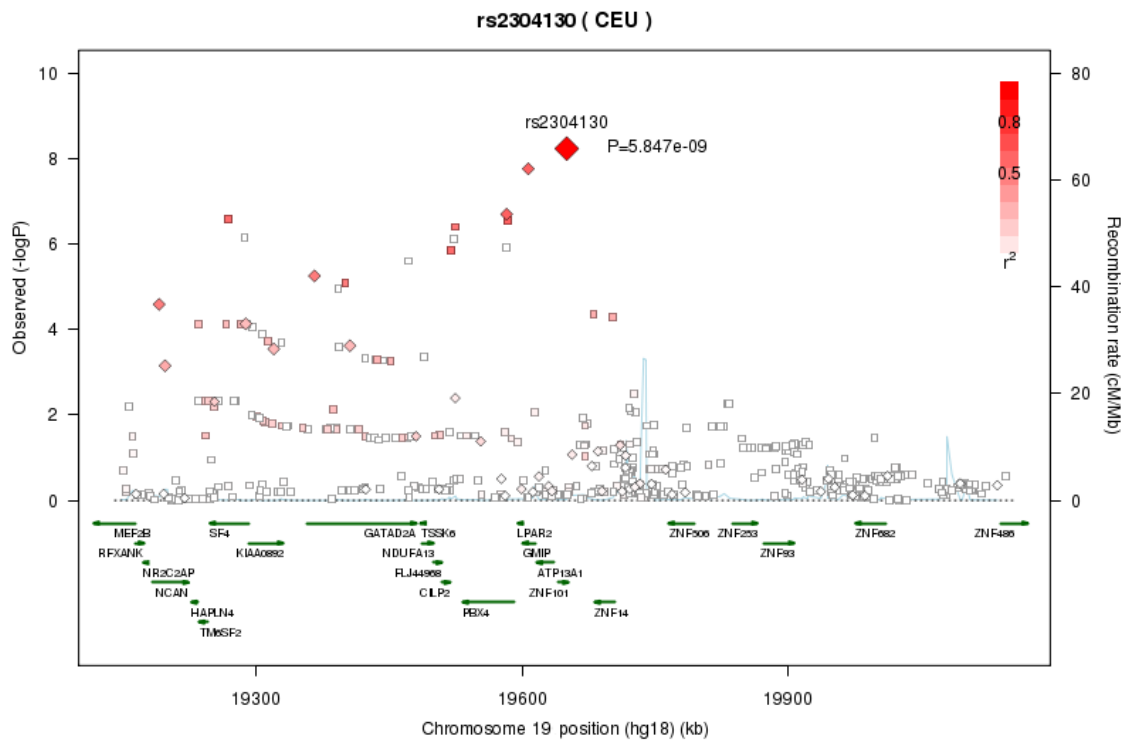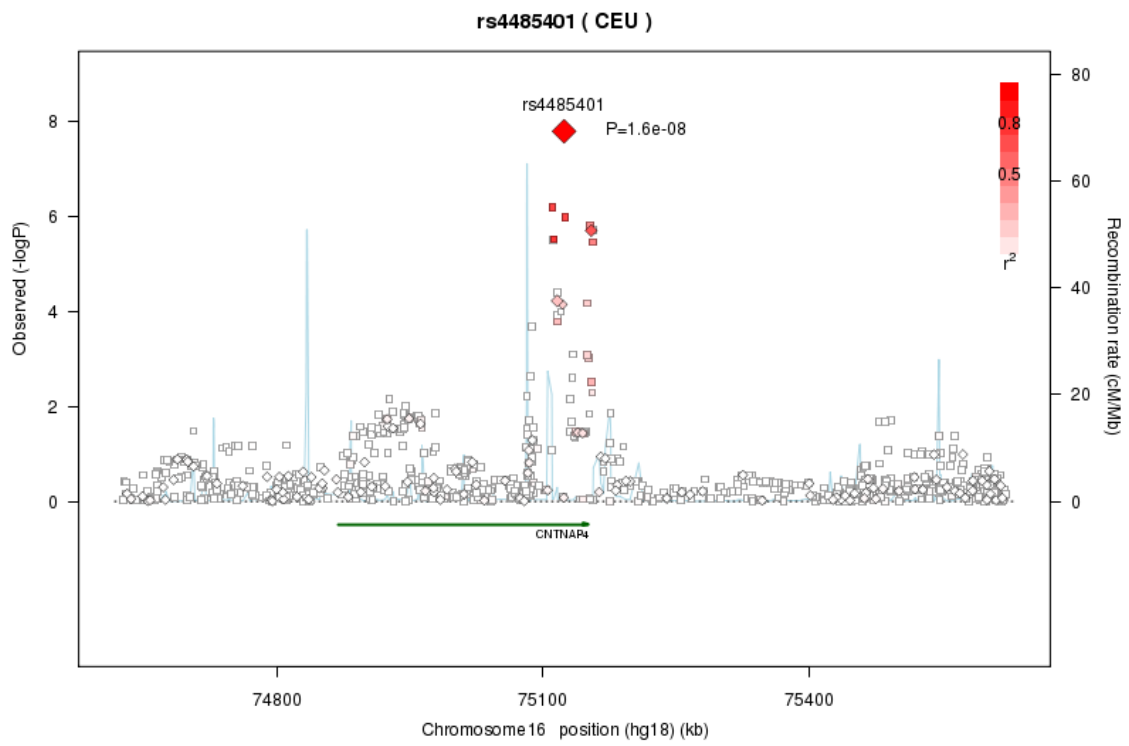

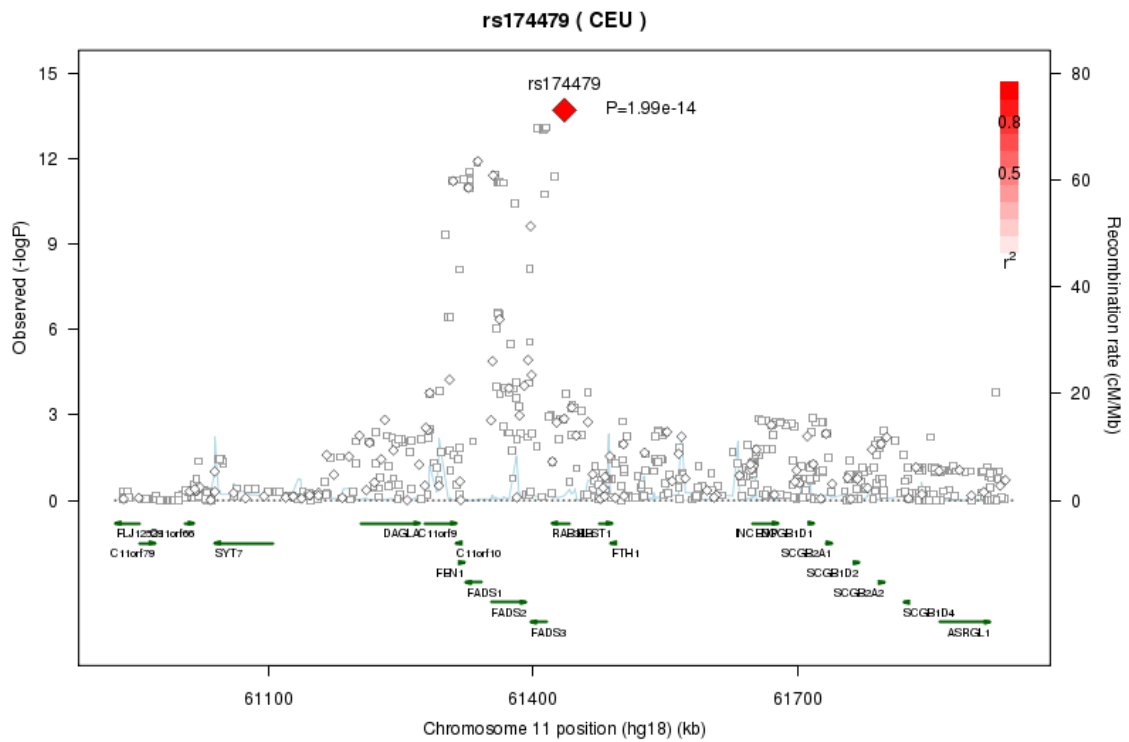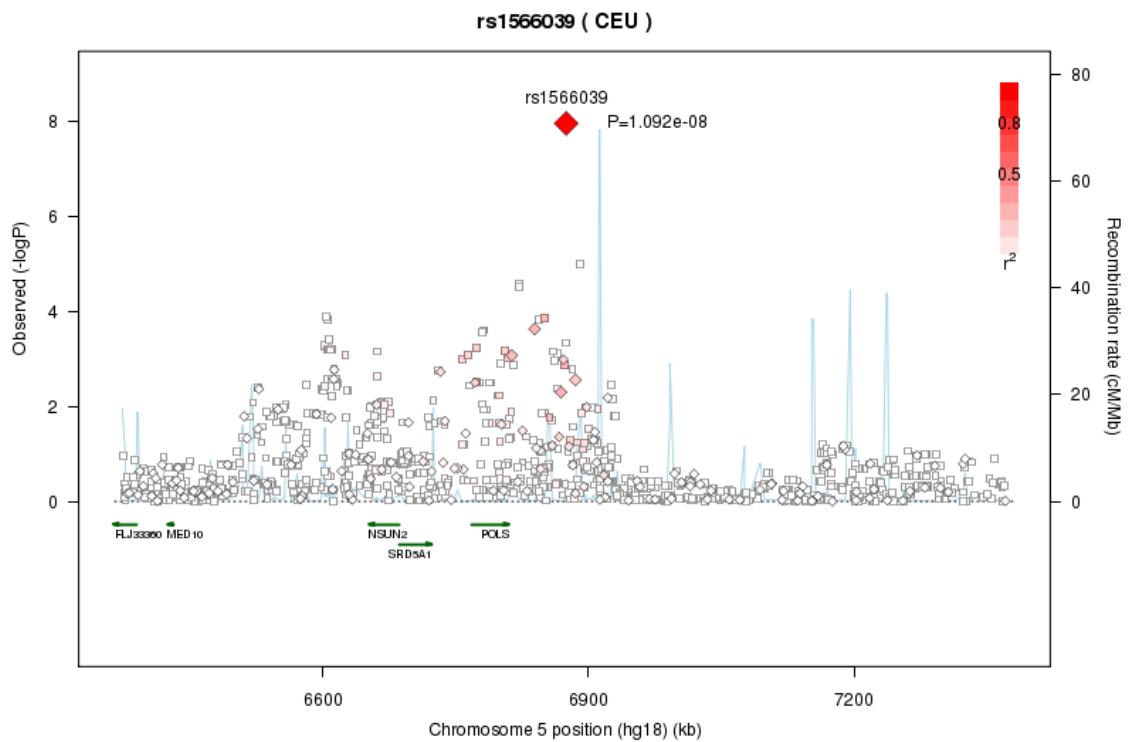

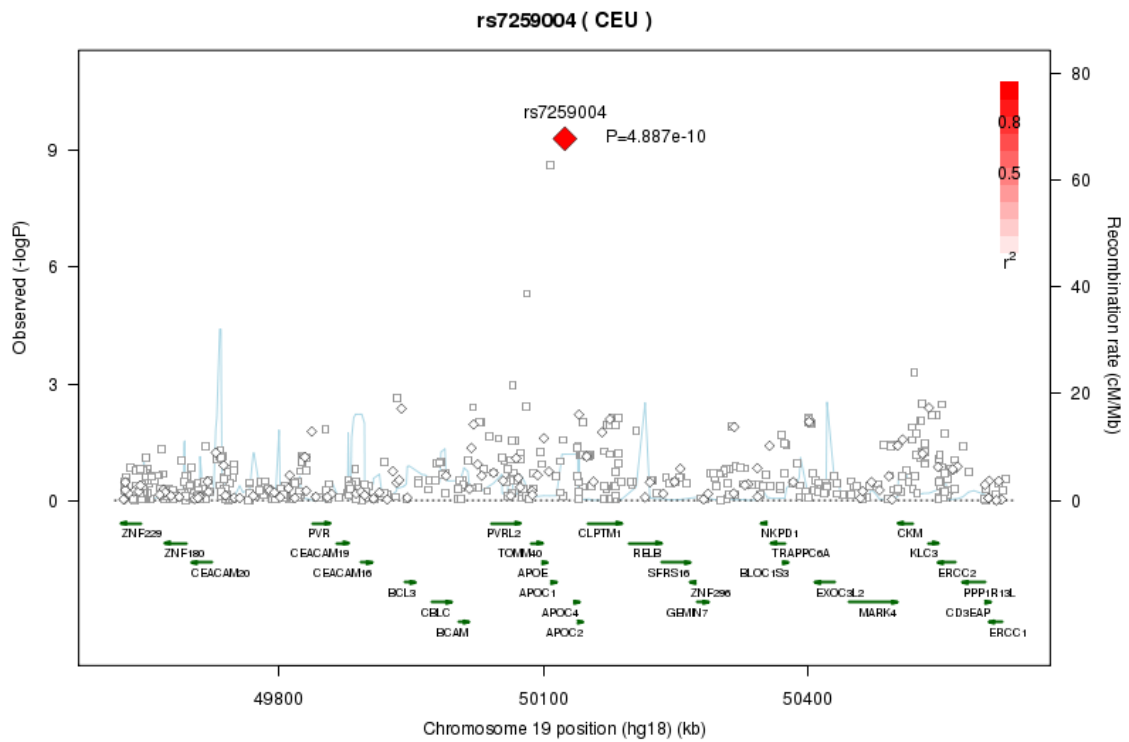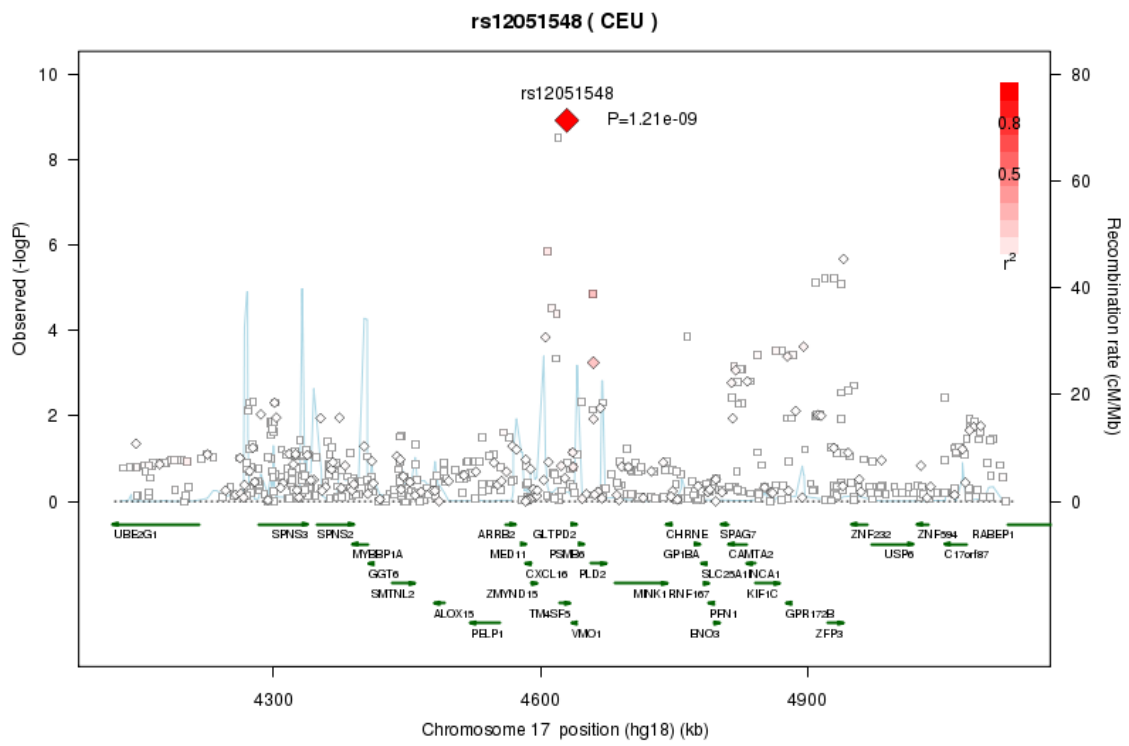

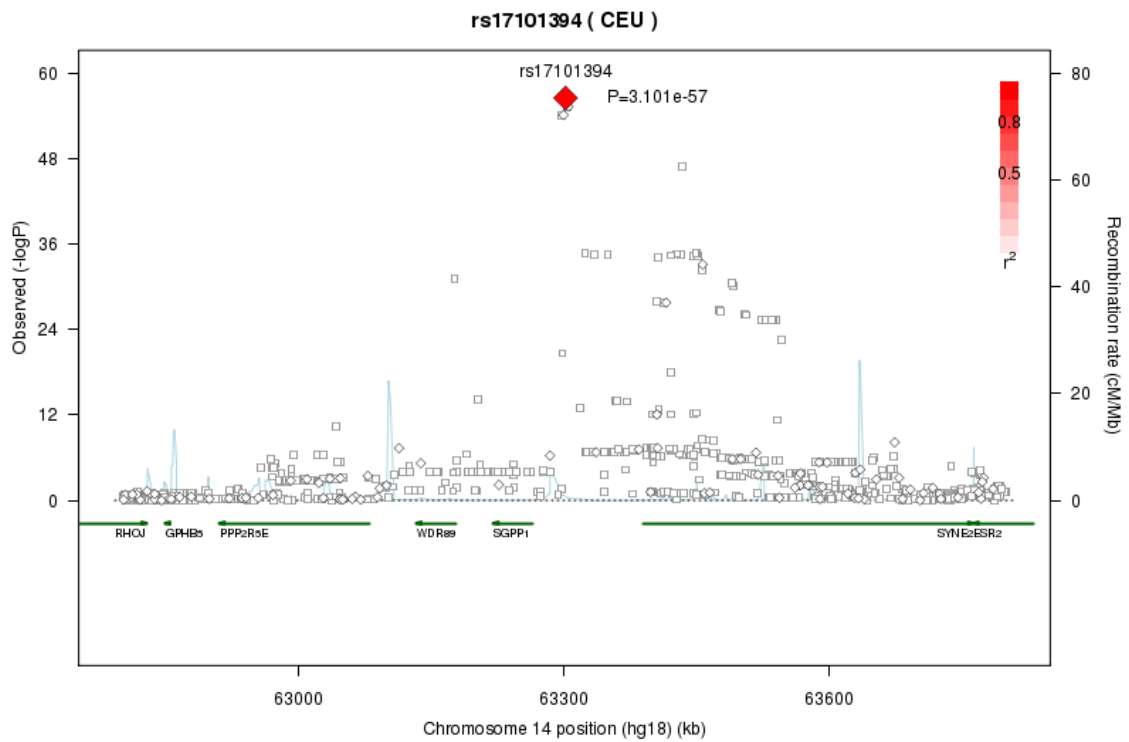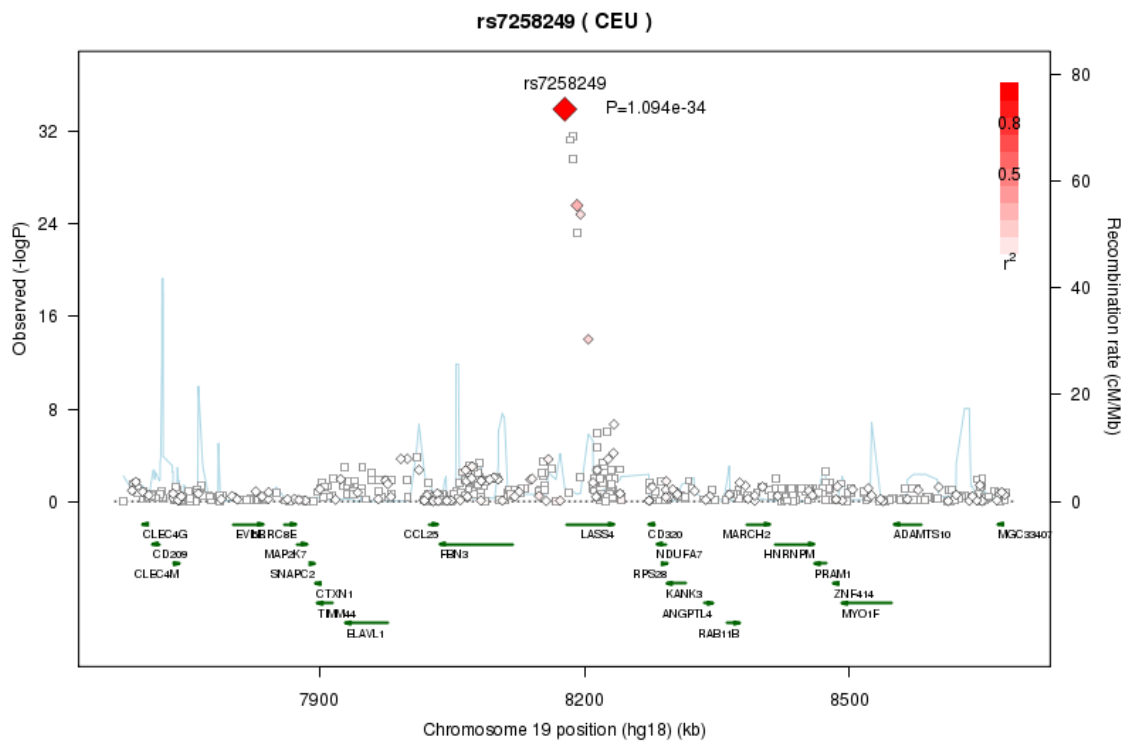

Supplement: pgen.1002490.s003.pdf [file pgen.1002490.s003.pdf]
