# Supplementary material for: Genome-Wide Association Study Identifies Novel Loci Associated with Circulating Phospho- and Sphingolipid Concentrations
Source: PubMed Central journal article supplement (PMC3280968; doi:10.1371/journal.pgen.1002490), 2012-02-16

Figure S5

Lipid Pathways by Ingenuity, sphingolipid metabolism.

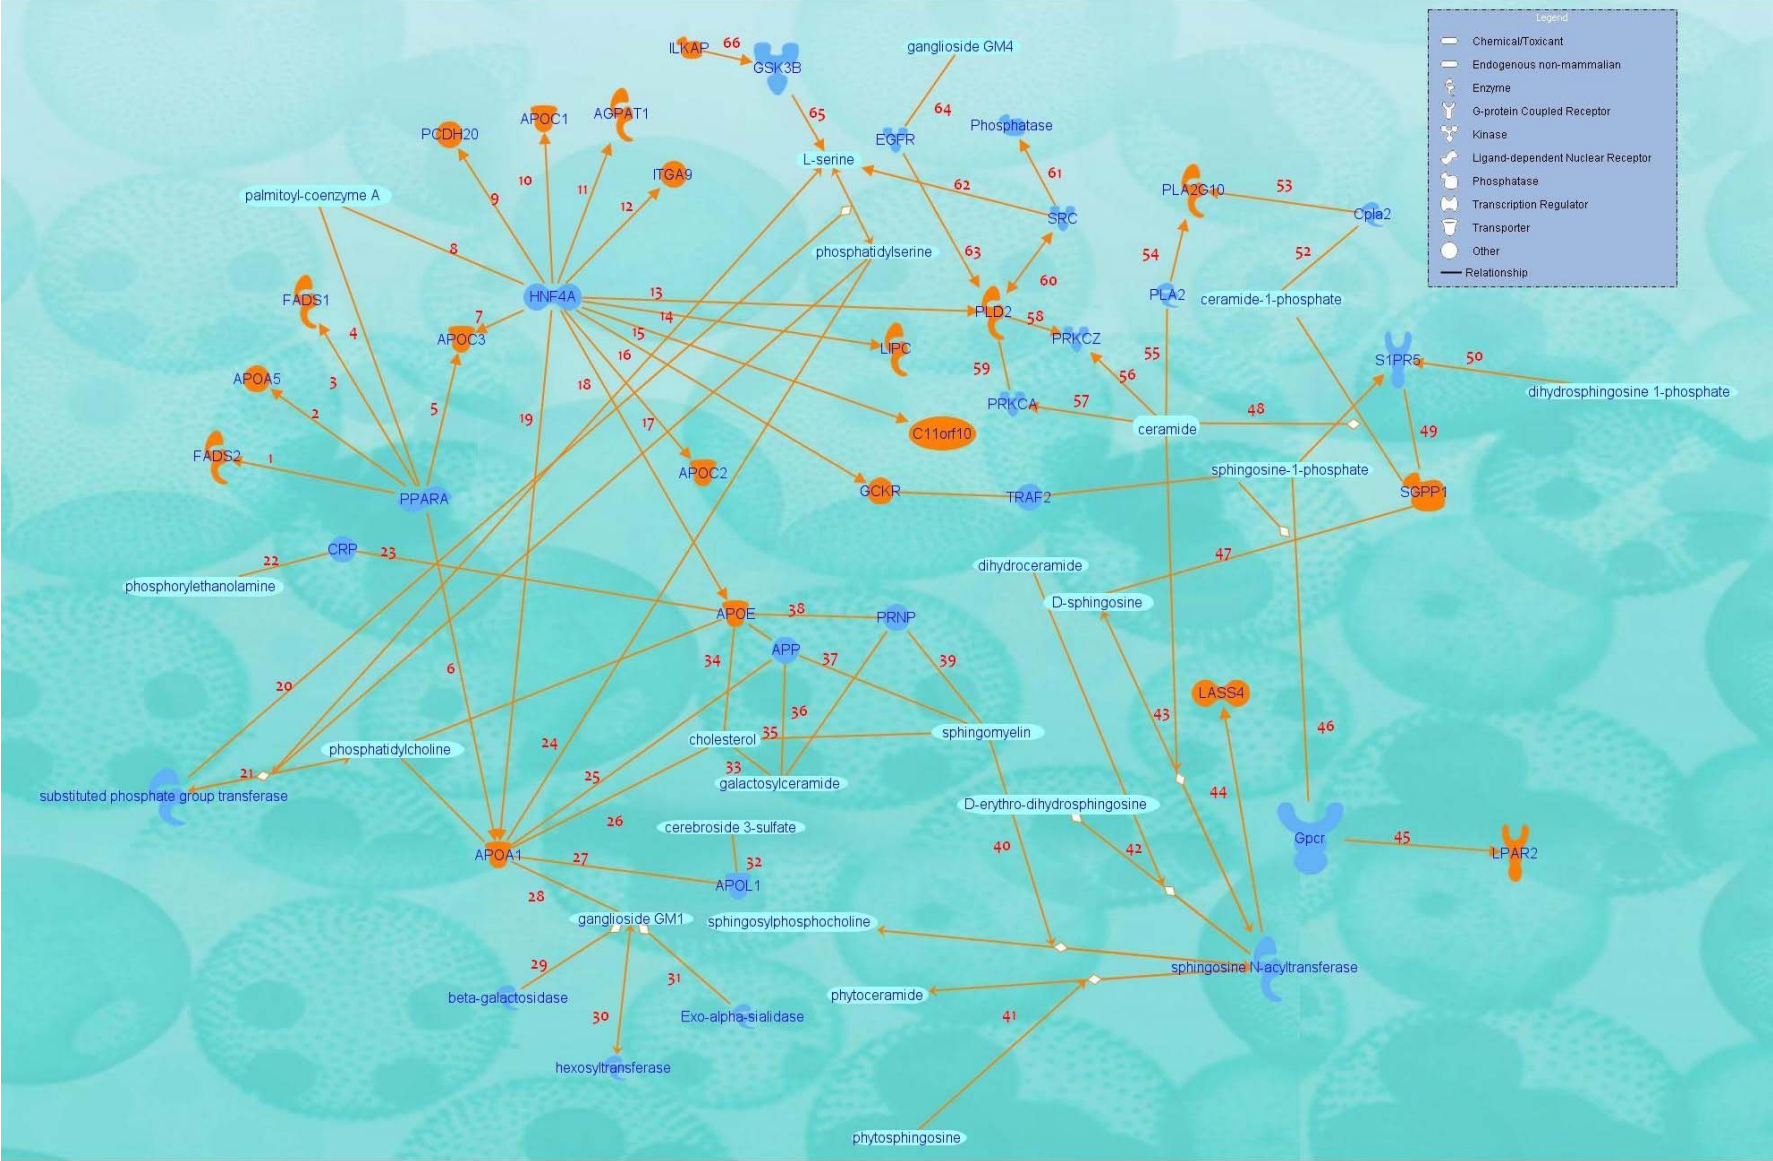

Supplement: pgen.1002490.s005.pdf [file pgen.1002490.s005.pdf]
