# Supplementary material for: Genome-Wide Association Study Identifies Novel Loci Associated with Circulating Phospho- and Sphingolipid Concentrations
Source: PubMed Central journal article supplement (PMC3280968; doi:10.1371/journal.pgen.1002490), 2012-02-16

Figure S6

Q-Q plots of the association between the top loci and disease endpoints; IMT, CAD and type 2 diabetes.

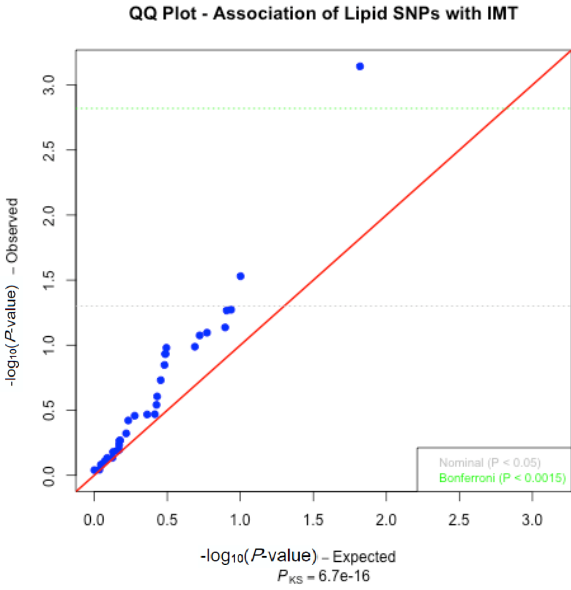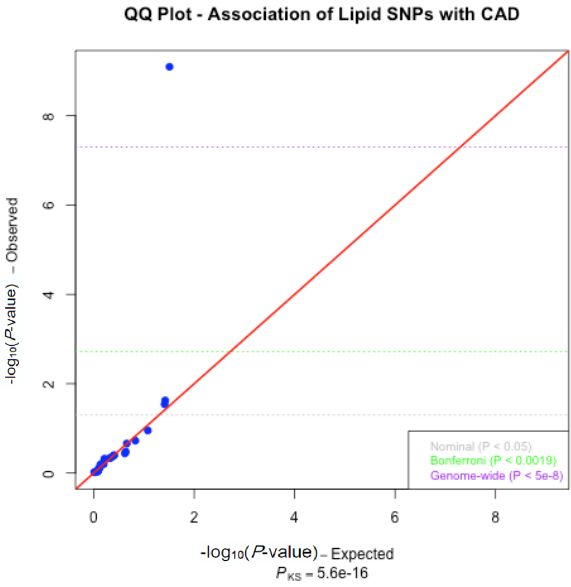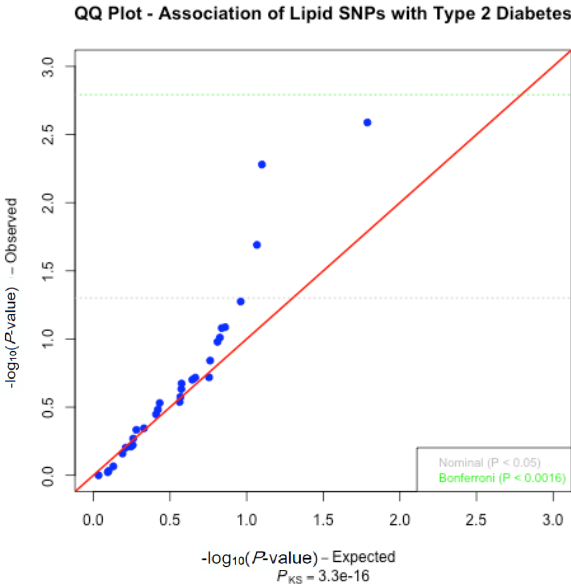

Supplement: pgen.1002490.s006.pdf [file pgen.1002490.s006.pdf]
