# Supplementary material for: Genome-Wide Association Study Identifies Novel Loci Associated with Circulating Phospho- and Sphingolipid Concentrations
Source: PubMed Central journal article supplement (PMC3280968; doi:10.1371/journal.pgen.1002490), 2012-02-16
Supplement: pgen.1002490.s007.pdf [file pgen.1002490.s007.pdf]

Table S1

A. Mean levels and standard deviations (SD) of circulating phosphatidylcholines (PC) in men (1759) and women (2275)

| PC- species | Absolute amounts of PC species [ $\mu\text{M}$ ] |         |         |         |                 | Proportions of PC species [% of total PC] |        |        |        |                 |
|-------------|--------------------------------------------------|---------|---------|---------|-----------------|-------------------------------------------|--------|--------|--------|-----------------|
|             | Men                                              |         | Women   |         | <i>P</i> -value | Men                                       |        | Women  |        | <i>P</i> -value |
|             | Mean                                             | SD      | Mean    | SD      |                 | Mean                                      | SD     | Mean   | SD     |                 |
| PC 26:0     | 0.420                                            | 0.429   | 0.416   | 0.434   | 7.72E-01        | <0.001                                    | <0.001 | <0.001 | <0.001 | 2.12E-01        |
| PC 30:1     | 1.396                                            | 1.680   | 1.524   | 1.815   | 2.15E-02        | 0.001                                     | 0.001  | 0.001  | 0.001  | 3.33E-01        |
| PC 30:0     | 4.838                                            | 2.516   | 5.280   | 2.782   | 1.82E-07        | 0.002                                     | 0.001  | 0.002  | 0.001  | 1.55E-02        |
| PC O 32:1   | 2.855                                            | 0.907   | 3.083   | 0.988   | 5.93E-14        | 0.001                                     | <0.001 | 0.001  | <0.001 | 4.40E-02        |
| PC O 32:0   | 3.654                                            | 1.160   | 4.066   | 1.274   | 8.21E-26        | 0.002                                     | <0.001 | 0.002  | <0.001 | 4.43E-08        |
| PC 32:2     | 4.669                                            | 2.070   | 5.628   | 2.517   | 1.75E-38        | 0.002                                     | 0.001  | 0.002  | 0.001  | 3.00E-33        |
| PC 32:1     | 19.572                                           | 12.510  | 20.559  | 10.926  | 9.59E-03        | 0.009                                     | 0.004  | 0.009  | 0.004  | 6.74E-01        |
| PC 32:0     | 16.461                                           | 4.416   | 17.191  | 4.507   | 3.64E-07        | 0.008                                     | 0.001  | 0.008  | 0.001  | 2.12E-03        |
| PC O 34:3   | 8.180                                            | 3.068   | 8.834   | 3.137   | 5.68E-11        | 0.004                                     | 0.001  | 0.004  | 0.001  | 2.99E-02        |
| PC O 34:2   | 12.124                                           | 4.057   | 13.631  | 4.079   | 2.79E-30        | 0.006                                     | 0.001  | 0.006  | 0.001  | 3.36E-14        |
| PC O 34:1   | 10.213                                           | 3.084   | 11.477  | 3.254   | 6.77E-35        | 0.005                                     | 0.001  | 0.005  | 0.001  | 7.42E-18        |
| PC O 34:0   | 1.848                                            | 0.839   | 1.955   | 0.828   | 7.10E-05        | 0.001                                     | <0.001 | 0.001  | <0.001 | 9.94E-01        |
| PC 34:4     | 1.865                                            | 0.909   | 2.067   | 0.957   | 1.71E-11        | 0.001                                     | <0.001 | 0.001  | <0.001 | 7.84E-07        |
| PC 34:3     | 16.528                                           | 6.041   | 18.969  | 6.526   | 2.62E-33        | 0.008                                     | 0.002  | 0.008  | 0.002  | 2.55E-24        |
| PC 34:2     | 522.212                                          | 130.552 | 566.750 | 139.528 | 1.45E-24        | 0.243                                     | 0.031  | 0.249  | 0.032  | 2.94E-09        |
| PC 34:1     | 258.181                                          | 90.158  | 259.223 | 83.556  | 7.11E-01        | 0.118                                     | 0.024  | 0.113  | 0.022  | 1.23E-13        |
| PC 34:0     | 4.678                                            | 3.317   | 4.566   | 3.163   | 2.86E-01        | 0.002                                     | 0.001  | 0.002  | 0.001  | 2.15E-04        |
| PC O 36:5   | 12.930                                           | 4.863   | 11.964  | 3.917   | 2.14E-11        | 0.006                                     | 0.002  | 0.005  | 0.001  | 2.43E-41        |
| PC O 36:4   | 18.213                                           | 6.300   | 17.519  | 4.956   | 1.76E-04        | 0.008                                     | 0.002  | 0.008  | 0.002  | 1.55E-26        |
| PC O 36:3   | 7.938                                            | 2.452   | 8.723   | 2.394   | 1.56E-23        | 0.004                                     | 0.001  | 0.004  | 0.001  | 1.86E-08        |
| PC O 36:2   | 14.843                                           | 4.857   | 16.954  | 5.026   | 1.35E-39        | 0.007                                     | 0.002  | 0.007  | 0.002  | 4.50E-23        |
| PC O 36:1   | 9.613                                            | 3.312   | 10.368  | 3.224   | 8.62E-13        | 0.004                                     | 0.001  | 0.005  | 0.001  | 1.81E-02        |
| PC O 36:0   | 1.060                                            | 0.522   | 1.102   | 0.518   | 1.26E-02        | <0.001                                    | <0.001 | <0.001 | <0.001 | 3.58E-01        |
| PC 36:5     | 28.350                                           | 18.380  | 27.339  | 17.408  | 7.98E-02        | 0.013                                     | 0.008  | 0.012  | 0.007  | 2.91E-06        |
| PC 36:4     | 209.772                                          | 67.612  | 215.995 | 65.029  | 3.61E-03        | 0.096                                     | 0.017  | 0.094  | 0.017  | 1.33E-04        |
| PC 36:3     | 148.663                                          | 41.521  | 164.132 | 45.570  | 3.04E-28        | 0.069                                     | 0.009  | 0.072  | 0.009  | 2.78E-24        |
| PC 36:2     | 279.314                                          | 73.646  | 297.449 | 73.464  | 2.16E-14        | 0.129                                     | 0.017  | 0.131  | 0.019  | 1.92E-02        |
| PC 36:1     | 46.870                                           | 19.264  | 46.731  | 17.192  | 8.14E-01        | 0.021                                     | 0.006  | 0.020  | 0.005  | 4.60E-09        |
| PC 36:0     | 3.533                                            | 1.989   | 3.545   | 2.000   | 8.45E-01        | 0.002                                     | 0.001  | 0.002  | 0.001  | 6.64E-03        |
| PC O 38:5   | 17.301                                           | 4.681   | 17.183  | 4.199   | 4.11E-01        | 0.008                                     | 0.002  | 0.008  | 0.002  | 2.84E-17        |

|           |         |        |         |        |          |        |        |        |        |          |
|-----------|---------|--------|---------|--------|----------|--------|--------|--------|--------|----------|
| PC O 38:4 | 12.554  | 3.855  | 13.134  | 3.645  | 1.68E-06 | 0.006  | 0.001  | 0.006  | 0.001  | 3.27E-01 |
| PC O 38:3 | 4.532   | 1.441  | 5.161   | 1.609  | 2.37E-37 | 0.002  | 0.001  | 0.002  | 0.001  | 2.24E-16 |
| PC O 38:2 | 2.288   | 1.022  | 2.524   | 1.131  | 8.31E-12 | 0.001  | <0.001 | 0.001  | <0.001 | 6.99E-04 |
| PC O 38:1 | 1.142   | 0.822  | 1.233   | 0.894  | 1.02E-03 | 0.001  | <0.001 | 0.001  | <0.001 | 3.65E-01 |
| PC 38:7   | 2.635   | 1.070  | 2.911   | 1.130  | 5.93E-15 | 0.001  | <0.001 | 0.001  | <0.001 | 1.19E-04 |
| PC 38:6   | 97.510  | 35.674 | 103.511 | 35.544 | 1.67E-07 | 0.046  | 0.015  | 0.046  | 0.014  | 9.84E-01 |
| PC 38:5   | 64.747  | 21.206 | 66.478  | 19.607 | 8.72E-03 | 0.030  | 0.006  | 0.029  | 0.006  | 5.98E-04 |
| PC 38:4   | 126.366 | 43.447 | 130.748 | 40.326 | 1.22E-03 | 0.058  | 0.013  | 0.057  | 0.014  | 7.43E-02 |
| PC 38:3   | 47.799  | 17.885 | 50.775  | 18.476 | 3.50E-07 | 0.022  | 0.005  | 0.022  | 0.006  | 4.34E-01 |
| PC 38:2   | 6.493   | 3.276  | 7.071   | 3.384  | 6.64E-08 | 0.003  | 0.001  | 0.003  | 0.001  | 5.00E-03 |
| PC 38:1   | 9.334   | 4.725  | 10.047  | 4.996  | 4.73E-06 | 0.004  | 0.002  | 0.004  | 0.002  | 1.65E-01 |
| PC 38:0   | 7.225   | 2.944  | 7.446   | 2.870  | 1.80E-02 | 0.003  | 0.001  | 0.003  | 0.001  | 2.82E-02 |
| PC O 40:6 | 4.482   | 1.400  | 4.863   | 1.510  | 3.55E-16 | 0.002  | 0.001  | 0.002  | 0.001  | 1.13E-02 |
| PC O 40:5 | 3.359   | 0.984  | 3.528   | 1.000  | 1.05E-07 | 0.002  | <0.001 | 0.002  | <0.001 | 4.44E-01 |
| PC O 40:4 | 2.271   | 0.719  | 2.448   | 0.756  | 8.27E-14 | 0.001  | <0.001 | 0.001  | <0.001 | 3.53E-02 |
| PC 40:7   | 6.883   | 2.224  | 7.858   | 2.520  | 4.19E-37 | 0.003  | 0.001  | 0.003  | 0.001  | 1.50E-14 |
| PC 40:6   | 32.534  | 13.532 | 33.844  | 13.473 | 2.55E-03 | 0.015  | 0.006  | 0.015  | 0.005  | 1.45E-01 |
| PC 40:5   | 12.005  | 4.732  | 11.771  | 4.223  | 1.07E-01 | 0.005  | 0.001  | 0.005  | 0.001  | 3.34E-15 |
| PC 40:4   | 4.493   | 1.939  | 4.412   | 1.663  | 1.68E-01 | 0.002  | 0.001  | 0.002  | 0.001  | 4.84E-12 |
| PC 40:3   | 3.468   | 1.898  | 3.563   | 1.878  | 1.15E-01 | 0.002  | 0.001  | 0.002  | 0.001  | 1.22E-01 |
| PC 40:2   | 2.535   | 1.306  | 2.810   | 1.454  | 4.82E-10 | 0.001  | 0.001  | 0.001  | 0.001  | 2.10E-03 |
| PC 40:1   | 4.516   | 2.398  | 4.845   | 2.558  | 3.38E-05 | 0.002  | 0.001  | 0.002  | 0.001  | 2.50E-01 |
| PC 40:0   | 1.597   | 0.750  | 1.662   | 0.754  | 7.30E-03 | 0.001  | <0.001 | 0.001  | 0.001  | 8.83E-01 |
| PC O 42:6 | 1.129   | 0.440  | 1.263   | 0.484  | 2.44E-19 | 0.001  | <0.001 | 0.001  | <0.001 | 6.96E-05 |
| PC O 42:5 | 1.444   | 0.490  | 1.570   | 0.526  | 1.39E-14 | 0.001  | <0.001 | 0.001  | <0.001 | 4.98E-02 |
| PC 42:5   | 1.580   | 0.810  | 1.678   | 0.863  | 2.36E-04 | 0.001  | <0.001 | 0.001  | 0.001  | 5.13E-01 |
| PC 42:4   | 0.945   | 0.587  | 0.962   | 0.588  | 3.66E-01 | <0.001 | <0.001 | <0.001 | <0.001 | 8.67E-02 |

B. Mean levels and standard deviations (SD) of circulating phosphatidylethanolamines (PE) in men (1759) and women (2275)

| PE species | Absolute amounts of PE species [ $\mu\text{M}$ ] |       |       |       |                 | Proportions of PE species [% of total PE] |       |       |       |                 |
|------------|--------------------------------------------------|-------|-------|-------|-----------------|-------------------------------------------|-------|-------|-------|-----------------|
|            | Men                                              |       | Women |       | <i>P</i> -value | Men                                       |       | Women |       | <i>P</i> -value |
|            | Mean                                             | SD    | Mean  | SD    |                 | Mean                                      | SD    | Mean  | SD    |                 |
| PE 32:2    | 0.109                                            | 0.051 | 0.122 | 0.056 | 1.49E-15        | 0.004                                     | 0.002 | 0.004 | 0.002 | 2.00E-01        |
| PE 32:1    | 0.292                                            | 0.256 | 0.333 | 0.243 | 4.14E-07        | 0.009                                     | 0.003 | 0.009 | 0.003 | 5.93E-01        |
| PE 32:0    | 0.128                                            | 0.067 | 0.130 | 0.066 | 4.47E-01        | 0.004                                     | 0.002 | 0.004 | 0.002 | 1.31E-10        |
| PE 34:3    | 0.347                                            | 0.197 | 0.410 | 0.251 | 2.72E-18        | 0.011                                     | 0.003 | 0.011 | 0.003 | 2.73E-01        |
| PE 34:2    | 4.911                                            | 2.879 | 5.914 | 3.761 | 4.39E-21        | 0.143                                     | 0.029 | 0.149 | 0.029 | 7.35E-09        |
| PE 34:1    | 2.686                                            | 1.861 | 2.870 | 1.989 | 2.84E-03        | 0.077                                     | 0.017 | 0.072 | 0.018 | 5.11E-21        |
| PE 34:0    | 0.141                                            | 0.095 | 0.134 | 0.085 | 8.20E-03        | 0.005                                     | 0.003 | 0.004 | 0.003 | 9.10E-13        |
| PE 36:5    | 0.317                                            | 0.197 | 0.339 | 0.207 | 6.57E-04        | 0.010                                     | 0.004 | 0.009 | 0.003 | 3.97E-08        |
| PE 36:4    | 2.494                                            | 1.305 | 2.915 | 1.633 | 3.26E-19        | 0.075                                     | 0.015 | 0.076 | 0.015 | 6.94E-02        |
| PE 36:3    | 1.863                                            | 1.242 | 2.153 | 1.333 | 2.26E-12        | 0.054                                     | 0.015 | 0.055 | 0.014 | 2.05E-02        |
| PE 36:2    | 6.484                                            | 4.161 | 6.950 | 3.968 | 3.90E-04        | 0.186                                     | 0.034 | 0.178 | 0.032 | 6.95E-13        |
| PE 36:1    | 1.405                                            | 1.089 | 1.285 | 0.825 | 1.35E-04        | 0.040                                     | 0.013 | 0.033 | 0.010 | 5.30E-73        |
| PE 38:6    | 2.613                                            | 1.856 | 3.492 | 2.481 | 2.50E-36        | 0.077                                     | 0.028 | 0.088 | 0.029 | 1.57E-33        |
| PE 38:5    | 1.442                                            | 0.889 | 1.692 | 0.968 | 5.62E-17        | 0.042                                     | 0.010 | 0.044 | 0.009 | 1.02E-05        |
| PE 38:4    | 4.433                                            | 2.486 | 4.975 | 2.510 | 1.68E-11        | 0.133                                     | 0.032 | 0.132 | 0.031 | 7.50E-01        |
| PE 38:3    | 0.541                                            | 0.377 | 0.640 | 0.414 | 8.53E-15        | 0.016                                     | 0.005 | 0.016 | 0.004 | 7.00E-05        |
| PE 38:2    | 0.160                                            | 0.094 | 0.173 | 0.098 | 4.41E-05        | 0.005                                     | 0.003 | 0.005 | 0.002 | 9.93E-04        |
| PE 38:1    | 0.194                                            | 0.108 | 0.202 | 0.095 | 1.05E-02        | 0.007                                     | 0.003 | 0.006 | 0.003 | 2.09E-06        |
| PE 40:6    | 1.783                                            | 1.204 | 2.182 | 1.411 | 2.03E-21        | 0.053                                     | 0.020 | 0.056 | 0.020 | 1.89E-07        |
| PE 40:5    | 0.452                                            | 0.303 | 0.485 | 0.285 | 5.48E-04        | 0.013                                     | 0.004 | 0.013 | 0.003 | 5.42E-08        |
| PE 40:4    | 0.163                                            | 0.105 | 0.167 | 0.094 | 1.61E-01        | 0.005                                     | 0.002 | 0.005 | 0.002 | 1.19E-15        |
| PE 40:3    | 0.046                                            | 0.033 | 0.049 | 0.035 | 1.93E-03        | 0.002                                     | 0.001 | 0.001 | 0.001 | 3.98E-02        |
| PE 42:7    | 0.048                                            | 0.023 | 0.054 | 0.028 | 7.90E-14        | 0.002                                     | 0.001 | 0.002 | 0.001 | 5.19E-02        |
| PE 42:6    | 0.032                                            | 0.016 | 0.035 | 0.019 | 4.00E-11        | 0.001                                     | 0.001 | 0.001 | 0.001 | 1.61E-01        |
| PE 42:5    | 0.027                                            | 0.017 | 0.030 | 0.019 | 8.20E-07        | 0.001                                     | 0.001 | 0.001 | 0.001 | 7.76E-02        |

C. Mean levels and standard deviations (SD) of circulating lysophosphatidylcholines (LPC) in men (1759) and women (2275)

| LPC species | Absolute amounts of LPC species [ $\mu\text{M}$ ] |        |        |        |                 | Proportions of LPC species [% of total LPC] |        |       |        |                 |
|-------------|---------------------------------------------------|--------|--------|--------|-----------------|---------------------------------------------|--------|-------|--------|-----------------|
|             | Men                                               |        | Women  |        | <i>P</i> -value | Men                                         |        | Women |        | <i>P</i> -value |
|             | Mean                                              | SD     | Mean   | SD     |                 | Mean                                        | SD     | Mean  | SD     |                 |
| LPC 15:0    | 1.732                                             | 0.881  | 1.773  | 0.885  | 1.50E-01        | 0.005                                       | 0.002  | 0.006 | 0.002  | 2.07E-40        |
| LPC 16:1    | 3.223                                             | 1.396  | 3.078  | 1.171  | 5.23E-04        | 0.010                                       | 0.003  | 0.010 | 0.002  | 6.31E-17        |
| LPC 16:0    | 175.786                                           | 69.311 | 159.44 | 58.06  | 4.86E-15        | 0.526                                       | 0.045  | 0.535 | 0.048  | 3.88E-10        |
| LPC 18:3    | 0.786                                             | 0.367  | 0.649  | 0.303  | 4.92E-35        | 0.002                                       | 0.001  | 0.002 | 0.001  | 8.68E-09        |
| LPC 18:2    | 40.402                                            | 15.086 | 33.411 | 12.671 | 4.74E-52        | 0.125                                       | 0.032  | 0.115 | 0.032  | 6.68E-21        |
| LPC 18:1    | 28.368                                            | 10.128 | 24.601 | 8.495  | 1.37E-34        | 0.087                                       | 0.017  | 0.084 | 0.015  | 1.69E-08        |
| LPC 18:0    | 62.171                                            | 26.288 | 56.984 | 22.80  | 9.14E-11        | 0.185                                       | 0.023  | 0.189 | 0.026  | 1.63E-09        |
| LPC 20:5    | 1.266                                             | 1.099  | 0.994  | 0.861  | 5.54E-17        | 0.004                                       | 0.003  | 0.004 | 0.003  | 4.46E-08        |
| LPC 20:4    | 10.068                                            | 5.362  | 8.431  | 4.439  | 3.50E-24        | 0.031                                       | 0.013  | 0.029 | 0.013  | 5.17E-05        |
| LPC 20:3    | 3.172                                             | 1.280  | 2.663  | 1.051  | 8.56E-40        | 0.010                                       | 0.003  | 0.009 | 0.003  | 1.98E-10        |
| LPC 20:0    | 0.427                                             | 0.153  | 0.406  | 0.135  | 9.92E-06        | 0.001                                       | <0.001 | 0.001 | <0.001 | 1.94E-09        |
| LPC 22:6    | 2.433                                             | 1.337  | 2.162  | 1.285  | 1.60E-10        | 0.008                                       | 0.004  | 0.008 | 0.004  | 3.51E-01        |
| LPC 22:5    | 0.859                                             | 0.527  | 0.728  | 0.484  | 1.38E-15        | 0.003                                       | 0.001  | 0.003 | 0.001  | 4.92E-03        |
| LPC 22:4    | 0.488                                             | 0.370  | 0.451  | 0.334  | 1.43E-03        | 0.002                                       | 0.001  | 0.002 | 0.001  | 9.44E-02        |
| LPC 22:0    | 0.715                                             | 0.471  | 0.717  | 0.389  | 9.06E-01        | 0.002                                       | 0.002  | 0.003 | 0.002  | 2.21E-07        |

D. Mean levels and standard deviations (SD) of circulating PE-plasmalogens (PLPE) in men (1759) and women (2275)

| PLPE species   | Absolute amounts of PLPE [ $\mu\text{M}$ ] |       |       |       |                 | Proportions of PLPE [% of total PLPE] |       |       |       |                 |
|----------------|--------------------------------------------|-------|-------|-------|-----------------|---------------------------------------|-------|-------|-------|-----------------|
|                | Men                                        |       | Women |       | <i>P</i> -value | Men                                   |       | Women |       | <i>P</i> -value |
|                | Mean                                       | SD    | Mean  | SD    |                 | Mean                                  | SD    | Mean  | SD    |                 |
| PLPE 16:0/18:2 | 2.424                                      | 1.016 | 2.408 | 0.955 | 6.13E-01        | 0.044                                 | 0.011 | 0.045 | 0.011 | 6.23E-06        |
| PLPE 16:0/18:1 | 0.908                                      | 0.34  | 0.896 | 0.298 | 2.53E-01        | 0.017                                 | 0.004 | 0.017 | 0.004 | 1.37E-05        |
| PLPE 16:0/20:5 | 0.909                                      | 0.703 | 0.808 | 0.63  | 2.83E-06        | 0.016                                 | 0.009 | 0.015 | 0.009 | 5.97E-06        |
| PLPE 16:0/20:4 | 6.795                                      | 3.059 | 6.021 | 2.469 | 1.83E-17        | 0.12                                  | 0.024 | 0.112 | 0.022 | 1.78E-27        |
| PLPE 16:0/22:6 | 3.944                                      | 1.435 | 4.039 | 1.413 | 3.87E-02        | 0.072                                 | 0.018 | 0.077 | 0.018 | 6.33E-15        |
| PLPE 16:0/22:5 | 1.838                                      | 0.874 | 1.671 | 0.672 | 5.83E-11        | 0.033                                 | 0.01  | 0.032 | 0.009 | 5.48E-05        |
| PLPE 18:1/18:2 | 1.705                                      | 0.706 | 1.777 | 0.697 | 1.62E-03        | 0.031                                 | 0.008 | 0.034 | 0.009 | 1.80E-22        |
| PLPE 18:1/18:1 | 0.76                                       | 0.284 | 0.759 | 0.266 | 9.03E-01        | 0.014                                 | 0.003 | 0.014 | 0.004 | 1.85E-08        |
| PLPE 18:1/20:5 | 0.744                                      | 0.532 | 0.696 | 0.597 | 7.82E-03        | 0.013                                 | 0.007 | 0.013 | 0.007 | 1.73E-02        |
| PLPE 18:1/20:4 | 5.218                                      | 2.363 | 4.829 | 1.966 | 3.94E-08        | 0.092                                 | 0.02  | 0.089 | 0.017 | 2.28E-05        |
| PLPE 18:1/22:6 | 2.049                                      | 0.918 | 2.18  | 1.018 | 2.30E-05        | 0.038                                 | 0.013 | 0.041 | 0.012 | 1.16E-15        |
| PLPE 18:0/18:2 | 3.935                                      | 1.701 | 3.961 | 1.618 | 6.33E-01        | 0.07                                  | 0.017 | 0.074 | 0.018 | 4.17E-11        |
| PLPE 18:0/18:1 | 1.145                                      | 0.515 | 1.09  | 0.535 | 9.97E-04        | 0.021                                 | 0.005 | 0.02  | 0.005 | 9.24E-01        |
| PLPE 18:0/20:5 | 1.691                                      | 1.601 | 1.516 | 1.35  | 2.64E-04        | 0.029                                 | 0.018 | 0.027 | 0.017 | 4.47E-04        |
| PLPE 18:0/20:4 | 10.918                                     | 5.399 | 9.898 | 4.24  | 1.34E-10        | 0.19                                  | 0.033 | 0.182 | 0.032 | 4.41E-14        |
| PLPE 18:0/22:6 | 3.729                                      | 1.692 | 3.828 | 1.708 | 7.17E-02        | 0.067                                 | 0.017 | 0.071 | 0.017 | 6.11E-13        |

E. Mean levels and standard deviations (SD) of circulating sphingomyelins (SPM) in men (1759) and women (2275)

|              | Absolute amounts of SPM [ $\mu$ M] |        |         |       |                 | Proportions of SPM [% of total SPM] |       |        |       |                 |
|--------------|------------------------------------|--------|---------|-------|-----------------|-------------------------------------|-------|--------|-------|-----------------|
|              | Male                               |        | Female  |       | <i>P</i> -value | Male                                |       | Female |       | <i>P</i> -value |
|              | Mean                               | SD     | Mean    | SD    |                 | Mean                                | SD    | Mean   | SD    |                 |
| SPM 14:0     | 12.579                             | 4.094  | 14.126  | 4.698 | 7.26E-28        | 0.025                               | 0.005 | 0.025  | 0.005 | 8.77E-01        |
| SPM 15:0     | 7.342                              | 2.605  | 8.379   | 2.964 | 6.13E-31        | 0.015                               | 0.004 | 0.015  | 0.003 | 1.78E-02        |
| SPM 16:1     | 20.375                             | 4.709  | 24.186  | 5.918 | 1.45E-105       | 0.041                               | 0.005 | 0.044  | 0.006 | 3.02E-46        |
| SPM 16:0     | 137.144                            | 30.381 | 149.993 | 32.84 | 3.07E-36        | 0.278                               | 0.021 | 0.272  | 0.021 | 6.23E-19        |
| SPM dih 16:0 | 6.068                              | 2.329  | 6.775   | 2.485 | 7.12E-20        | 0.012                               | 0.003 | 0.012  | 0.004 | 6.52E-01        |
| SPM 17:0     | 4.706                              | 1.673  | 5.345   | 1.841 | 1.82E-29        | 0.009                               | 0.002 | 0.010  | 0.002 | 6.94E-02        |
| SPM 18:2     | 0.943                              | 0.416  | 1.310   | 0.615 | 3.26E-103       | 0.002                               | 0.001 | 0.002  | 0.001 | 1.10E-54        |
| SPM 18:1     | 13.576                             | 3.622  | 16.622  | 4.661 | 1.47E-110       | 0.028                               | 0.005 | 0.030  | 0.005 | 3.43E-57        |
| SPM 18:0     | 26.513                             | 6.970  | 29.677  | 7.690 | 1.28E-40        | 0.054                               | 0.007 | 0.054  | 0.007 | 6.70E-01        |
| SPM dih 18:0 | 1.561                              | 1.120  | 1.662   | 1.152 | 5.81E-03        | 0.003                               | 0.002 | 0.003  | 0.002 | 4.35E-02        |
| SPM 20:1     | 6.759                              | 3.756  | 9.155   | 4.210 | 1.07E-75        | 0.014                               | 0.007 | 0.016  | 0.007 | 1.51E-36        |
| SPM 20:0     | 18.896                             | 8.459  | 20.584  | 8.842 | 1.27E-09        | 0.038                               | 0.013 | 0.037  | 0.012 | 4.02E-02        |
| SPM 22:2     | 3.621                              | 3.323  | 4.111   | 3.486 | 7.13E-06        | 0.007                               | 0.006 | 0.007  | 0.006 | 4.36E-01        |
| SPM 22:1     | 29.937                             | 7.724  | 35.254  | 8.936 | 9.43E-85        | 0.060                               | 0.008 | 0.064  | 0.008 | 3.22E-37        |
| SPM 22:0     | 36.634                             | 10.847 | 39.051  | 10.88 | 5.14E-12        | 0.074                               | 0.012 | 0.070  | 0.011 | 4.17E-17        |
| SPM dih 22:0 | 2.303                              | 2.009  | 2.225   | 1.957 | 2.23E-01        | 0.005                               | 0.004 | 0.004  | 0.003 | 1.76E-06        |
| SPM 23:1     | 14.370                             | 4.082  | 17.461  | 4.885 | 5.73E-98        | 0.029                               | 0.005 | 0.031  | 0.004 | 1.69E-60        |
| SPM 23:0     | 16.816                             | 5.265  | 18.659  | 5.453 | 1.82E-26        | 0.034                               | 0.006 | 0.034  | 0.005 | 3.69E-01        |
| SPM dih 23:0 | 0.785                              | 0.575  | 0.864   | 0.632 | 4.11E-05        | 0.002                               | 0.001 | 0.002  | 0.001 | 7.54E-01        |
| SPM 24:3     | 3.803                              | 2.132  | 4.781   | 2.420 | 2.30E-40        | 0.008                               | 0.004 | 0.009  | 0.004 | 4.21E-14        |
| SPM 24:2     | 32.952                             | 8.129  | 39.410  | 9.897 | 2.73E-105       | 0.067                               | 0.010 | 0.072  | 0.010 | 1.07E-40        |
| SPM 24:1     | 74.513                             | 17.742 | 80.506  | 18.71 | 2.18E-24        | 0.152                               | 0.019 | 0.147  | 0.019 | 1.46E-16        |
| SPM 24:0     | 25.581                             | 7.398  | 25.662  | 7.011 | 7.26E-01        | 0.052                               | 0.008 | 0.046  | 0.008 | 7.93E-83        |
| SPM dih 24:0 | 0.915                              | 0.831  | 0.967   | 0.841 | 5.48E-02        | 0.002                               | 0.002 | 0.002  | 0.001 | 4.14E-02        |

F. Mean levels and standard deviations (SD) of circulating ceramides in men (1759) and women (2275)

|              | Absolute amounts of Ceramides [ $\mu\text{M}$ ] |       |        |       |                 | Proportions of Ceramides [% of total Ceramide] |       |        |       |                 |
|--------------|-------------------------------------------------|-------|--------|-------|-----------------|------------------------------------------------|-------|--------|-------|-----------------|
|              | Male                                            |       | Female |       | <i>P</i> -value | Male                                           |       | Female |       | <i>P</i> -value |
|              | Mean                                            | SD    | Mean   | SD    |                 | Mean                                           | SD    | Mean   | SD    |                 |
| CER 16:0     | 0.951                                           | 0.287 | 1.005  | 0.300 | 9.65E-09        | 0.111                                          | 0.027 | 0.119  | 0.030 | 1.63E-19        |
| CER 18:0     | 0.216                                           | 0.065 | 0.225  | 0.069 | 9.10E-06        | 0.025                                          | 0.006 | 0.027  | 0.007 | 9.83E-14        |
| CER 20:0     | 0.190                                           | 0.059 | 0.198  | 0.058 | 1.03E-05        | 0.022                                          | 0.006 | 0.023  | 0.006 | 5.46E-11        |
| CER 22:0     | 1.171                                           | 0.342 | 1.166  | 0.352 | 6.98E-01        | 0.133                                          | 0.015 | 0.134  | 0.015 | 1.43E-02        |
| CER 23:0     | 1.072                                           | 0.371 | 1.105  | 0.375 | 5.85E-03        | 0.121                                          | 0.019 | 0.126  | 0.018 | 2.48E-20        |
| CER 24:1     | 1.635                                           | 0.570 | 1.585  | 0.561 | 5.73E-03        | 0.187                                          | 0.040 | 0.184  | 0.040 | 1.53E-02        |
| CER 24:0     | 3.548                                           | 1.080 | 3.370  | 1.024 | 1.52E-07        | 0.402                                          | 0.040 | 0.387  | 0.038 | 1.30E-30        |
| Glu-CER 16:0 | 0.462                                           | 0.146 | 0.493  | 0.158 | 4.58E-10        | 0.055                                          | 0.019 | 0.059  | 0.022 | 1.22E-12        |
| Glu-CER 24:1 | 0.615                                           | 0.218 | 0.644  | 0.249 | 1.47E-04        | 0.073                                          | 0.031 | 0.078  | 0.037 | 2.86E-05        |
