# Supplementary material for: Genome-Wide Association Study Identifies Novel Loci Associated with Circulating Phospho- and Sphingolipid Concentrations
Source: PubMed Central journal article supplement (PMC3280968; doi:10.1371/journal.pgen.1002490), 2012-02-16
Supplement: pgen.1002490.s008.pdf [file pgen.1002490.s008.pdf]

Table S2

## Association findings on selected lipid-lipid ratios

| <b>Locus</b> | <b>Gene</b> | <b>SNP</b> | <b>Ratio</b>          | <b>Process</b> | <b>Effect</b> | <b>seEffect</b> | <b>P-value</b> |
|--------------|-------------|------------|-----------------------|----------------|---------------|-----------------|----------------|
| 1p21.3       | TMEM56      | rs9437689  | LPC15:0 / LPC18:0     | elongation     | -0.0005       | 0.0002          | 8.8E-03        |
| 1p21.3       | TMEM56      | rs9437689  | LPC18:0 / LPC 18:2    | saturation     | 0.0204        | 0.0113          | 7.1E-02        |
| 1p21.3       | TMEM56      | rs9437689  | LPC18:0 / LPC20:0     | elongation     | 0.3991        | 0.7265          | 5.8E-01        |
| 1p21.3       | TMEM56      | rs9437689  | LPC18:0 / LPC22:0     | elongation     | 1.3664        | 0.6594          | 3.8E-02        |
| 1p21.3       | TMEM56      | rs9437689  | LPC18:0 / LPC18:2     | saturation     | 0.0204        | 0.0113          | 7.1E-02        |
| 1p21.3       | TMEM56      | rs9437689  | LPC18:0 / LPC18:3     | saturation     | 1.5094        | 0.6640          | 2.3E-02        |
| 1p21.3       | TMEM56      | rs9437689  | LPC18:0 / LPC18:1     | saturation     | 0.0354        | 0.0109          | 1.1E-03        |
| 1p21.3       | TMEM56      | rs9437689  | LPC18:0 / LPC 16:1    | unclassified   | 0.3688        | 0.1227          | 2.6E-03        |
| 1p21.3       | TMEM56      | rs9437689  | LPC18:0 / LPC 22:4    | unclassified   | 5.6493        | 1.6689          | 7.1E-04        |
| 1p21.3       | TMEM56      | rs9437689  | LPC18:0 / LPC 20:4    | unclassified   | 0.1963        | 0.1464          | 3.1E-04        |
| 1p21.3       | TMEM56      | rs9437689  | LPC18:0 / LPC 20:3    | unclassified   | 0.4878        | 0.1464          | 8.6E-04        |
| 1p21.3       | TMEM56      | rs9437689  | LPC18:0 / LPC 22:6    | unclassified   | 0.2220        | 0.3619          | 3.6E-01        |
| 1p21.3       | TMEM56      | rs9437689  | LPC18:0 / LPC 22:5    | unclassified   | 1.3394        | 0.6917          | 5.3E-02        |
| 1p21.3       | TMEM56      | rs9437689  | LPC18:0 / LPC 20:0    | elongation     | 0.3991        | 0.7265          | 5.8E-01        |
| 1p21.3       | TMEM56      | rs9437689  | LPC18:0 / LPC 20:5    | unclassified   | -0.0018       | 0.6530          | 1.0E+00        |
| 1p21.3       | TMEM56      | rs9437689  | LPC16:0 / LPC18:0     | elongation     | -0.0578       | 0.0104          | 2.7E-08        |
| 2q24.3       | KCNH7       | rs1424760  | PC O 36:5 / PC O 38:5 | elongation     | -0.0152       | 0.0032          | 1.57E-06       |
| 2q24.3       | KCNH7       | rs1424760  | PC O 36:5 / PC O 40:5 | elongation     | -0.0984       | 0.0277          | 3.88E-04       |
| 2q24.3       | KCNH7       | rs1424760  | PC O 36:5 / PC O 42:5 | elongation     | -0.2898       | 0.0856          | 7.15E-04       |
| 2q24.3       | KCNH7       | rs1424760  | PC O 36:5 / PC 36:5   | oxidation      | -0.0132       | 0.0053          | 1.24E-02       |
| 2q24.3       | KCNH7       | rs1424760  | PC O 36:5 / PC O 36:4 | saturation     | -0.0120       | 0.0033          | 2.50E-04       |
| 2q24.3       | KCNH7       | rs1424760  | PC O 36:5 / PC O 36:3 | saturation     | -0.0474       | 0.0105          | 5.83E-06       |
| 2q24.3       | KCNH7       | rs1424760  | PC O 36:5 / PC O 36:2 | saturation     | -0.0297       | 0.0069          | 1.55E-05       |
| 2q24.3       | KCNH7       | rs1424760  | PC O 36:5 / PC O 36:1 | saturation     | -0.0461       | 0.0102          | 6.74E-06       |
| 2q24.3       | KCNH7       | rs1424760  | PC O 36:5 / PC O 36:0 | saturation     | -0.2855       | 0.2245          | 2.04E-01       |
| 2q24.3       | KCNH7       | rs1424760  | PC O 36:5 / PC 26:0   | unclassified   | -1.8165       | 0.5873          | 1.98E-03       |
| 2q24.3       | KCNH7       | rs1424760  | PC O 36:5 / PC 30:1   | unclassified   | 0.5560        | 0.6367          | 3.83E-01       |
| 2q24.3       | KCNH7       | rs1424760  | PC O 36:5 / PC 30:0   | unclassified   | -0.0778       | 0.0385          | 4.31E-02       |
| 2q24.3       | KCNH7       | rs1424760  | PC O 36:5 / PC O 32:1 | unclassified   | -0.1182       | 0.0353          | 8.00E-04       |
| 2q24.3       | KCNH7       | rs1424760  | PC O 36:5 / PC O 32:0 | unclassified   | -0.1060       | 0.0299          | 3.95E-04       |
| 2q24.3       | KCNH7       | rs1424760  | PC O 36:5 / PC 32:2   | unclassified   | -0.0808       | 0.0401          | 4.41E-02       |
| 2q24.3       | KCNH7       | rs1424760  | PC O 36:5 / PC 32:1   | unclassified   | -0.0307       | 0.0097          | 1.57E-03       |
| 2q24.3       | KCNH7       | rs1424760  | PC O 36:5 / PC 32:0   | unclassified   | -0.0278       | 0.0053          | 1.75E-07       |
| 2q24.3       | KCNH7       | rs1424760  | PC O 36:5 / PC O 34:3 | unclassified   | -0.0244       | 0.0109          | 2.49E-02       |
| 2q24.3       | KCNH7       | rs1424760  | PC O 36:5 / PC O 34:2 | unclassified   | -0.0354       | 0.0075          | 2.08E-06       |
| 2q24.3       | KCNH7       | rs1424760  | PC O 36:5 / PC O 34:1 | unclassified   | -0.0455       | 0.0091          | 5.95E-07       |
| 2q24.3       | KCNH7       | rs1424760  | PC O 36:5 / PC O 34:0 | unclassified   | -0.2945       | 0.0735          | 6.12E-05       |
| 2q24.3       | KCNH7       | rs1424760  | PC O 36:5 / PC 34:4   | unclassified   | -0.2303       | 0.0815          | 4.73E-03       |

|        |       |            |                       |              |         |        |          |
|--------|-------|------------|-----------------------|--------------|---------|--------|----------|
| 2q24.3 | KCNH7 | rs1424760  | PC O 36:5 / PC 34:3   | unclassified | -0.0287 | 0.0065 | 1.07E-05 |
| 2q24.3 | KCNH7 | rs1424760  | PC O 36:5 / PC 34:2   | unclassified | -0.0007 | 0.0002 | 4.27E-05 |
| 2q24.3 | KCNH7 | rs1424760  | PC O 36:5 / PC 34:1   | unclassified | -0.0019 | 0.0004 | 9.02E-06 |
| 2q24.3 | KCNH7 | rs1424760  | PC O 36:5 / PC 34:0   | unclassified | -0.0431 | 0.0514 | 4.02E-01 |
| 2q24.3 | KCNH7 | rs1424760  | PC O 36:5 / PC 36:4   | unclassified | -0.0016 | 0.0004 | 6.04E-05 |
| 2q24.3 | KCNH7 | rs1424760  | PC O 36:5 / PC 36:3   | unclassified | -0.0031 | 0.0007 | 1.76E-06 |
| 2q24.3 | KCNH7 | rs1424760  | PC O 36:5 / PC 36:2   | unclassified | -0.0016 | 0.0003 | 2.02E-06 |
| 2q24.3 | KCNH7 | rs1424760  | PC O 36:5 / PC 36:1   | unclassified | -0.0121 | 0.0025 | 1.45E-06 |
| 2q24.3 | KCNH7 | rs1424760  | PC O 36:5 / PC 36:0   | unclassified | -0.1107 | 0.0593 | 6.19E-02 |
| 2q24.3 | KCNH7 | rs1424760  | PC O 36:5 / PC O 38:4 | unclassified | -0.0228 | 0.0058 | 8.25E-05 |
| 2q24.3 | KCNH7 | rs1424760  | PC O 36:5 / PC O 38:3 | unclassified | -0.0865 | 0.0227 | 1.34E-04 |
| 2q24.3 | KCNH7 | rs1424760  | PC O 36:5 / PC O 38:2 | unclassified | -0.2815 | 0.1758 | 1.09E-01 |
| 2q24.3 | KCNH7 | rs1424760  | PC O 36:5 / PC O 38:1 | unclassified | -0.2596 | 0.4790 | 5.88E-01 |
| 2q24.3 | KCNH7 | rs1424760  | PC O 36:5 / PC 38:7   | unclassified | -0.1862 | 0.0505 | 2.30E-04 |
| 2q24.3 | KCNH7 | rs1424760  | PC O 36:5 / PC 38:6   | unclassified | -0.0049 | 0.0011 | 1.33E-05 |
| 2q24.3 | KCNH7 | rs1424760  | PC O 36:5 / PC 38:5   | unclassified | -0.0056 | 0.0013 | 1.21E-05 |
| 2q24.3 | KCNH7 | rs1424760  | PC O 36:5 / PC 38:4   | unclassified | -0.0024 | 0.0007 | 3.90E-04 |
| 2q24.3 | KCNH7 | rs1424760  | PC O 36:5 / PC 38:3   | unclassified | -0.0101 | 0.0027 | 1.68E-04 |
| 2q24.3 | KCNH7 | rs1424760  | PC O 36:5 / PC 38:2   | unclassified | -0.1124 | 0.0833 | 1.77E-01 |
| 2q24.3 | KCNH7 | rs1424760  | PC O 36:5 / PC 38:1   | unclassified | -0.0327 | 0.0253 | 1.96E-01 |
| 2q24.3 | KCNH7 | rs1424760  | PC O 36:5 / PC 38:0   | unclassified | -0.0575 | 0.0181 | 1.47E-03 |
| 2q24.3 | KCNH7 | rs1424760  | PC O 36:5 / PC O 40:6 | unclassified | -0.1043 | 0.0209 | 5.84E-07 |
| 2q24.3 | KCNH7 | rs1424760  | PC O 36:5 / PC O 40:4 | unclassified | -0.1146 | 0.0433 | 8.21E-03 |
| 2q24.3 | KCNH7 | rs1424760  | PC O 36:5 / PC 40:7   | unclassified | -0.0719 | 0.0152 | 2.16E-06 |
| 2q24.3 | KCNH7 | rs1424760  | PC O 36:5 / PC 40:6   | unclassified | -0.0164 | 0.0039 | 3.08E-05 |
| 2q24.3 | KCNH7 | rs1424760  | PC O 36:5 / PC 40:5   | unclassified | -0.0326 | 0.0095 | 6.00E-04 |
| 2q24.3 | KCNH7 | rs1424760  | PC O 36:5 / PC 40:4   | unclassified | -0.0437 | 0.0267 | 1.01E-01 |
| 2q24.3 | KCNH7 | rs1424760  | PC O 36:5 / PC 40:3   | unclassified | -0.0407 | 0.0630 | 5.18E-01 |
| 2q24.3 | KCNH7 | rs1424760  | PC O 36:5 / PC 40:2   | unclassified | -0.1520 | 0.0900 | 9.12E-02 |
| 2q24.3 | KCNH7 | rs1424760  | PC O 36:5 / PC 40:1   | unclassified | -0.0439 | 0.0545 | 4.20E-01 |
| 2q24.3 | KCNH7 | rs1424760  | PC O 36:5 / PC 40:0   | unclassified | -0.3735 | 0.1139 | 1.05E-03 |
| 2q24.3 | KCNH7 | rs1424760  | PC O 36:5 / PC O 42:6 | unclassified | -0.3138 | 0.1159 | 6.80E-03 |
| 2q24.3 | KCNH7 | rs1424760  | PC O 36:5 / PC 42:5   | unclassified | -0.1456 | 0.1366 | 2.87E-01 |
| 2q24.3 | KCNH7 | rs1424760  | PC O 36:5 / PC 42:4   | unclassified | -0.3689 | 0.3032 | 2.24E-01 |
| 2q37.3 | ILKAP | rs12472274 | PC 40:3 / PC 34:3     | elongation   | 0.0122  | 0.0029 | 2.63E-05 |
| 2q37.3 | ILKAP | rs12472274 | PC 40:3 / PC 36:3     | elongation   | 0.0015  | 0.0003 | 2.91E-07 |
| 2q37.3 | ILKAP | rs12472274 | PC 40:3 / PC 38:3     | elongation   | 0.0057  | 0.0011 | 7.62E-08 |
| 2q37.3 | ILKAP | rs12472274 | PC 40:3 / PC 40:7     | saturation   | 0.0276  | 0.0066 | 2.65E-05 |
| 2q37.3 | ILKAP | rs12472274 | PC 40:3 / PC 40:6     | saturation   | 0.0070  | 0.0016 | 1.17E-05 |
| 2q37.3 | ILKAP | rs12472274 | PC 40:3 / PC 40:5     | saturation   | 0.0233  | 0.0042 | 4.02E-08 |
| 2q37.3 | ILKAP | rs12472274 | PC 40:3 / PC 40:4     | saturation   | 0.0571  | 0.0103 | 3.39E-08 |

|        |       |            |                     |              |        |        |          |
|--------|-------|------------|---------------------|--------------|--------|--------|----------|
| 2q37.3 | ILKAP | rs12472274 | PC 40:3 / PC 40:2   | saturation   | 0.0373 | 0.0139 | 7.26E-03 |
| 2q37.3 | ILKAP | rs12472274 | PC 40:3 / PC 40:1   | saturation   | 0.0236 | 0.0086 | 6.25E-03 |
| 2q37.3 | ILKAP | rs12472274 | PC 40:3 / PC 40:0   | saturation   | 0.0672 | 0.0333 | 4.39E-02 |
| 2q37.3 | ILKAP | rs12472274 | PC 40:3 / PC 26:0   | unclassified | 0.4345 | 0.1966 | 2.71E-02 |
| 2q37.3 | ILKAP | rs12472274 | PC 40:3 / PC 30:1   | unclassified | 0.5413 | 0.2188 | 1.34E-02 |
| 2q37.3 | ILKAP | rs12472274 | PC 40:3 / PC 30:0   | unclassified | 0.0363 | 0.0136 | 7.67E-03 |
| 2q37.3 | ILKAP | rs12472274 | PC 40:3 / PC O 32:1 | unclassified | 0.0700 | 0.0185 | 1.52E-04 |
| 2q37.3 | ILKAP | rs12472274 | PC 40:3 / PC O 32:0 | unclassified | 0.0663 | 0.0138 | 1.53E-06 |
| 2q37.3 | ILKAP | rs12472274 | PC 40:3 / PC 32:2   | unclassified | 0.0568 | 0.0156 | 2.59E-04 |
| 2q37.3 | ILKAP | rs12472274 | PC 40:3 / PC 32:1   | unclassified | 0.0143 | 0.0036 | 6.27E-05 |
| 2q37.3 | ILKAP | rs12472274 | PC 40:3 / PC 32:0   | unclassified | 0.0128 | 0.0026 | 1.14E-06 |
| 2q37.3 | ILKAP | rs12472274 | PC 40:3 / PC O 34:3 | unclassified | 0.0241 | 0.0071 | 7.34E-04 |
| 2q37.3 | ILKAP | rs12472274 | PC 40:3 / PC O 34:2 | unclassified | 0.0192 | 0.0042 | 5.03E-06 |
| 2q37.3 | ILKAP | rs12472274 | PC 40:3 / PC O 34:1 | unclassified | 0.0216 | 0.0044 | 1.23E-06 |
| 2q37.3 | ILKAP | rs12472274 | PC 40:3 / PC O 34:0 | unclassified | 0.1044 | 0.0312 | 8.34E-04 |
| 2q37.3 | ILKAP | rs12472274 | PC 40:3 / PC 34:4   | unclassified | 0.1003 | 0.0323 | 1.91E-03 |
| 2q37.3 | ILKAP | rs12472274 | PC 40:3 / PC 34:2   | unclassified | 0.0004 | 0.0001 | 1.51E-06 |
| 2q37.3 | ILKAP | rs12472274 | PC 40:3 / PC 34:1   | unclassified | 0.0009 | 0.0002 | 9.97E-07 |
| 2q37.3 | ILKAP | rs12472274 | PC 40:3 / PC 34:0   | unclassified | 0.0427 | 0.0142 | 2.57E-03 |
| 2q37.3 | ILKAP | rs12472274 | PC 40:3 / PC O 36:5 | unclassified | 0.0160 | 0.0037 | 1.48E-05 |
| 2q37.3 | ILKAP | rs12472274 | PC 40:3 / PC O 36:4 | unclassified | 0.0126 | 0.0025 | 4.64E-07 |
| 2q37.3 | ILKAP | rs12472274 | PC 40:3 / PC O 36:3 | unclassified | 0.0267 | 0.0061 | 1.19E-05 |
| 2q37.3 | ILKAP | rs12472274 | PC 40:3 / PC O 36:2 | unclassified | 0.0152 | 0.0034 | 6.21E-06 |
| 2q37.3 | ILKAP | rs12472274 | PC 40:3 / PC O 36:1 | unclassified | 0.0231 | 0.0050 | 3.11E-06 |
| 2q37.3 | ILKAP | rs12472274 | PC 40:3 / PC O 36:0 | unclassified | 0.1608 | 0.0692 | 2.01E-02 |
| 2q37.3 | ILKAP | rs12472274 | PC 40:3 / PC 36:5   | unclassified | 0.0075 | 0.0022 | 7.11E-04 |
| 2q37.3 | ILKAP | rs12472274 | PC 40:3 / PC 36:4   | unclassified | 0.0009 | 0.0002 | 5.39E-07 |
| 2q37.3 | ILKAP | rs12472274 | PC 40:3 / PC 36:2   | unclassified | 0.0008 | 0.0002 | 3.66E-06 |
| 2q37.3 | ILKAP | rs12472274 | PC 40:3 / PC 36:1   | unclassified | 0.0052 | 0.0011 | 4.28E-06 |
| 2q37.3 | ILKAP | rs12472274 | PC 40:3 / PC 36:0   | unclassified | 0.0306 | 0.0175 | 8.11E-02 |
| 2q37.3 | ILKAP | rs12472274 | PC 40:3 / PC O 38:5 | unclassified | 0.0117 | 0.0025 | 2.34E-06 |
| 2q37.3 | ILKAP | rs12472274 | PC 40:3 / PC O 38:4 | unclassified | 0.0162 | 0.0033 | 1.03E-06 |
| 2q37.3 | ILKAP | rs12472274 | PC 40:3 / PC O 38:3 | unclassified | 0.0445 | 0.0103 | 1.53E-05 |
| 2q37.3 | ILKAP | rs12472274 | PC 40:3 / PC O 38:2 | unclassified | 0.1096 | 0.0527 | 3.75E-02 |
| 2q37.3 | ILKAP | rs12472274 | PC 40:3 / PC O 38:1 | unclassified | 0.2081 | 0.1508 | 1.68E-01 |
| 2q37.3 | ILKAP | rs12472274 | PC 40:3 / PC 38:7   | unclassified | 0.0455 | 0.0202 | 2.47E-02 |
| 2q37.3 | ILKAP | rs12472274 | PC 40:3 / PC 38:6   | unclassified | 0.0020 | 0.0005 | 3.01E-05 |
| 2q37.3 | ILKAP | rs12472274 | PC 40:3 / PC 38:5   | unclassified | 0.0032 | 0.0006 | 9.84E-07 |
| 2q37.3 | ILKAP | rs12472274 | PC 40:3 / PC 38:4   | unclassified | 0.0017 | 0.0003 | 1.90E-07 |
| 2q37.3 | ILKAP | rs12472274 | PC 40:3 / PC 38:2   | unclassified | 0.0348 | 0.0248 | 1.61E-01 |
| 2q37.3 | ILKAP | rs12472274 | PC 40:3 / PC 38:1   | unclassified | 0.0099 | 0.0042 | 1.80E-02 |

|        |       |            |                                 |              |         |        |          |
|--------|-------|------------|---------------------------------|--------------|---------|--------|----------|
| 2q37.3 | ILKAP | rs12472274 | PC 40:3 / PC 38:0               | unclassified | 0.0172  | 0.0045 | 1.59E-04 |
| 2q37.3 | ILKAP | rs12472274 | PC 40:3 / PC O 40:6             | unclassified | 0.0502  | 0.0101 | 7.47E-07 |
| 2q37.3 | ILKAP | rs12472274 | PC 40:3 / PC O 40:5             | unclassified | 0.0677  | 0.0139 | 1.15E-06 |
| 2q37.3 | ILKAP | rs12472274 | PC 40:3 / PC O 40:4             | unclassified | 0.0863  | 0.0196 | 1.04E-05 |
| 2q37.3 | ILKAP | rs12472274 | PC 40:3 / PC O 42:6             | unclassified | 0.2321  | 0.0473 | 9.37E-07 |
| 2q37.3 | ILKAP | rs12472274 | PC 40:3 / PC O 42:5             | unclassified | 0.1554  | 0.0367 | 2.25E-05 |
| 2q37.3 | ILKAP | rs12472274 | PC 40:3 / PC 42:5               | unclassified | 0.0751  | 0.0279 | 7.15E-03 |
| 2q37.3 | ILKAP | rs12472274 | PC 40:3 / PC 42:4               | unclassified | 0.0179  | 0.0638 | 7.79E-01 |
| 3p22.2 | ITGA9 | rs197770   | PLPE 18:0/22:6 / PLPE 16:0/18:2 | unclassified | -0.0659 | 0.0211 | 1.80E-03 |
| 3p22.2 | ITGA9 | rs197770   | PLPE 18:0/22:6 / PLPE 16:0/18:1 | unclassified | -0.2058 | 0.0510 | 5.45E-05 |
| 3p22.2 | ITGA9 | rs197770   | PLPE 18:0/22:6 / PLPE 16:0/20:5 | unclassified | 0.0014  | 0.0712 | 9.84E-01 |
| 3p22.2 | ITGA9 | rs197770   | PLPE 18:0/22:6 / PLPE 16:0/20:4 | unclassified | -0.0113 | 0.0068 | 9.90E-02 |
| 3p22.2 | ITGA9 | rs197770   | PLPE 18:0/22:6 / PLPE 16:0/22:6 | unclassified | -0.0141 | 0.0065 | 3.06E-02 |
| 3p22.2 | ITGA9 | rs197770   | PLPE 18:0/22:6 / PLPE 16:0/22:5 | unclassified | -0.0823 | 0.0283 | 3.71E-03 |
| 3p22.2 | ITGA9 | rs197770   | PLPE 18:0/22:6 / PLPE 18:1/18:2 | unclassified | -0.0890 | 0.0288 | 2.02E-03 |
| 3p22.2 | ITGA9 | rs197770   | PLPE 18:0/22:6 / PLPE 18:1/18:1 | unclassified | -0.1683 | 0.0606 | 5.45E-03 |
| 3p22.2 | ITGA9 | rs197770   | PLPE 18:0/22:6 / PLPE 18:1/20:5 | unclassified | 0.0397  | 0.0789 | 6.15E-01 |
| 3p22.2 | ITGA9 | rs197770   | PLPE 18:0/22:6 / PLPE 18:1/20:4 | unclassified | -0.0095 | 0.0087 | 2.74E-01 |
| 3p22.2 | ITGA9 | rs197770   | PLPE 18:0/22:6 / PLPE 18:1/22:6 | unclassified | -0.0067 | 0.0117 | 5.64E-01 |
| 3p22.2 | ITGA9 | rs197770   | PLPE 18:0/22:6 / PLPE 18:0/18:2 | unclassified | -0.0369 | 0.0123 | 2.75E-03 |
| 3p22.2 | ITGA9 | rs197770   | PLPE 18:0/22:6 / PLPE 18:0/18:1 | unclassified | -0.1218 | 0.0390 | 1.80E-03 |
| 3p22.2 | ITGA9 | rs197770   | PLPE 18:0/22:6 / PLPE 18:0/20:5 | unclassified | 0.0190  | 0.0360 | 5.97E-01 |
| 3p22.2 | ITGA9 | rs197770   | PLPE 18:0/22:6 / PLPE 18:0/20:4 | unclassified | -0.0043 | 0.0039 | 2.73E-01 |
| 3q23   | PAQR9 | rs9832727  | PE 34:1 / PE 32:1               | elongation   | -0.3744 | 0.0728 | 2.67E-07 |
| 3q23   | PAQR9 | rs9832727  | PE 34:1 / PE 36:1               | elongation   | -0.0002 | 0.0152 | 9.90E-01 |
| 3q23   | PAQR9 | rs9832727  | PE 34:1 / PE 38:1               | elongation   | -0.9461 | 0.2529 | 1.83E-04 |
| 3q23   | PAQR9 | rs9832727  | PE 36:1 / PE 32:1               | elongation   | -0.1464 | 0.0509 | 4.05E-03 |
| 3q23   | PAQR9 | rs9832727  | PE 36:1 / PE 34:1               | elongation   | 0.0030  | 0.0035 | 3.95E-01 |
| 3q23   | PAQR9 | rs9832727  | PE 36:1 / PE 38:1               | elongation   | -0.4938 | 0.0982 | 4.91E-07 |
| 3q23   | PAQR9 | rs9832727  | PE 34:1 / PE 34:3               | saturation   | -0.4371 | 0.0571 | 2.00E-14 |
| 3q23   | PAQR9 | rs9832727  | PE 34:1 / PE 34:2               | saturation   | -0.0356 | 0.0033 | 6.45E-28 |
| 3q23   | PAQR9 | rs9832727  | PE 34:1 / PE 34:0               | saturation   | -1.0042 | 0.3618 | 5.51E-03 |
| 3q23   | PAQR9 | rs9832727  | PE 36:1 / PE 36:5               | saturation   | -0.2493 | 0.0443 | 1.89E-08 |
| 3q23   | PAQR9 | rs9832727  | PE 36:1 / PE 36:4               | saturation   | -0.0265 | 0.0043 | 6.72E-10 |
| 3q23   | PAQR9 | rs9832727  | PE 36:1 / PE 36:3               | saturation   | -0.0446 | 0.0054 | 2.10E-16 |
| 3q23   | PAQR9 | rs9832727  | PE 36:1 / PE 36:2               | saturation   | -0.0119 | 0.0012 | 1.23E-22 |
| 3q23   | PAQR9 | rs9832727  | PE 34:1 / PE 32:2               | unclassified | -1.3756 | 0.2755 | 5.94E-07 |
| 3q23   | PAQR9 | rs9832727  | PE 34:1 / PE 32:0               | unclassified | -1.2343 | 0.2608 | 2.21E-06 |
| 3q23   | PAQR9 | rs9832727  | PE 34:1 / PE 36:5               | unclassified | -0.4912 | 0.0872 | 1.78E-08 |
| 3q23   | PAQR9 | rs9832727  | PE 34:1 / PE 36:4               | unclassified | -0.0601 | 0.0067 | 2.37E-19 |
| 3q23   | PAQR9 | rs9832727  | PE 34:1 / PE 36:3               | unclassified | -0.0969 | 0.0120 | 6.37E-16 |

|         |       |           |                     |              |         |        |          |
|---------|-------|-----------|---------------------|--------------|---------|--------|----------|
| 3q23    | PAQR9 | rs9832727 | PE 34:1 / PE 36:2   | unclassified | -0.0256 | 0.0030 | 4.97E-17 |
| 3q23    | PAQR9 | rs9832727 | PE 34:1 / PE O 38:7 | unclassified | -1.1138 | 0.3923 | 4.52E-03 |
| 3q23    | PAQR9 | rs9832727 | PE 34:1 / PE 38:6   | unclassified | -0.0754 | 0.0133 | 1.27E-08 |
| 3q23    | PAQR9 | rs9832727 | PE 34:1 / PE 38:5   | unclassified | -0.1104 | 0.0170 | 9.34E-11 |
| 3q23    | PAQR9 | rs9832727 | PE 34:1 / PE 38:4   | unclassified | -0.0356 | 0.0064 | 2.25E-08 |
| 3q23    | PAQR9 | rs9832727 | PE 34:1 / PE 38:3   | unclassified | -0.3293 | 0.0485 | 1.08E-11 |
| 3q23    | PAQR9 | rs9832727 | PE 34:1 / PE 38:2   | unclassified | -1.0948 | 0.2616 | 2.85E-05 |
| 3q23    | PAQR9 | rs9832727 | PE 34:1 / PE O 40:3 | unclassified | -0.2619 | 0.0458 | 1.05E-08 |
| 3q23    | PAQR9 | rs9832727 | PE 34:1 / PE 40:6   | unclassified | -0.1002 | 0.0197 | 3.48E-07 |
| 3q23    | PAQR9 | rs9832727 | PE 34:1 / PE 40:5   | unclassified | -0.3171 | 0.0565 | 1.95E-08 |
| 3q23    | PAQR9 | rs9832727 | PE 34:1 / PE 40:4   | unclassified | -0.9483 | 0.1897 | 5.76E-07 |
| 3q23    | PAQR9 | rs9832727 | PE 34:1 / PE 40:3   | unclassified | -3.8073 | 1.3216 | 3.97E-03 |
| 3q23    | PAQR9 | rs9832727 | PE 34:1 / PE 42:7   | unclassified | -3.3738 | 0.8529 | 7.62E-05 |
| 3q23    | PAQR9 | rs9832727 | PE 34:1 / PE 42:6   | unclassified | -3.9159 | 1.4365 | 6.41E-03 |
| 3q23    | PAQR9 | rs9832727 | PE 34:1 / PE 42:5   | unclassified | -7.7283 | 1.7911 | 1.60E-05 |
| 3q23    | PAQR9 | rs9832727 | PE 36:1 / PE 32:2   | unclassified | -0.6186 | 0.1239 | 5.94E-07 |
| 3q23    | PAQR9 | rs9832727 | PE 36:1 / PE 32:0   | unclassified | -0.6072 | 0.1155 | 1.47E-07 |
| 3q23    | PAQR9 | rs9832727 | PE 36:1 / PE 34:3   | unclassified | -0.2072 | 0.0340 | 1.14E-09 |
| 3q23    | PAQR9 | rs9832727 | PE 36:1 / PE 34:2   | unclassified | -0.0166 | 0.0022 | 3.64E-14 |
| 3q23    | PAQR9 | rs9832727 | PE 36:1 / PE 34:0   | unclassified | -0.5145 | 0.1517 | 6.96E-04 |
| 3q23    | PAQR9 | rs9832727 | PE 36:1 / PE O 38:7 | unclassified | -0.5248 | 0.1542 | 6.66E-04 |
| 3q23    | PAQR9 | rs9832727 | PE 36:1 / PE 38:6   | unclassified | -0.0342 | 0.0075 | 5.55E-06 |
| 3q23    | PAQR9 | rs9832727 | PE 36:1 / PE 38:5   | unclassified | -0.0567 | 0.0096 | 4.12E-09 |
| 3q23    | PAQR9 | rs9832727 | PE 36:1 / PE 38:4   | unclassified | -0.0172 | 0.0030 | 8.76E-09 |
| 3q23    | PAQR9 | rs9832727 | PE 36:1 / PE 38:3   | unclassified | -0.1516 | 0.0257 | 3.46E-09 |
| 3q23    | PAQR9 | rs9832727 | PE 36:1 / PE 38:2   | unclassified | -0.5731 | 0.1070 | 8.47E-08 |
| 3q23    | PAQR9 | rs9832727 | PE 36:1 / PE O 40:3 | unclassified | -0.1293 | 0.0212 | 1.08E-09 |
| 3q23    | PAQR9 | rs9832727 | PE 36:1 / PE 40:6   | unclassified | -0.0418 | 0.0098 | 2.21E-05 |
| 3q23    | PAQR9 | rs9832727 | PE 36:1 / PE 40:5   | unclassified | -0.1420 | 0.0314 | 6.05E-06 |
| 3q23    | PAQR9 | rs9832727 | PE 36:1 / PE 40:4   | unclassified | -0.3990 | 0.0894 | 8.01E-06 |
| 3q23    | PAQR9 | rs9832727 | PE 36:1 / PE 40:3   | unclassified | -1.7467 | 0.5206 | 7.93E-04 |
| 3q23    | PAQR9 | rs9832727 | PE 36:1 / PE 42:7   | unclassified | -1.5871 | 0.3596 | 1.02E-05 |
| 3q23    | PAQR9 | rs9832727 | PE 36:1 / PE 42:6   | unclassified | -1.8019 | 0.5870 | 2.14E-03 |
| 3q23    | PAQR9 | rs9832727 | PE 36:1 / PE 42:5   | unclassified | -3.2463 | 0.7245 | 7.44E-06 |
| 5p15.31 | PAPD7 | rs1566039 | SPM 17:0 / SPM 16:0 | elongation   | 0.0006  | 0.0002 | 2.48E-04 |
| 5p15.31 | PAPD7 | rs1566039 | SPM 17:0 / SPM 18:1 | unclassified | 0.0047  | 0.0018 | 9.69E-03 |
| 5p15.31 | PAPD7 | rs1566039 | SPM 17:0 / SPM 20:1 | unclassified | 0.0090  | 0.0039 | 1.94E-02 |
| 5p15.31 | PAPD7 | rs1566039 | SPM 17:0 / SPM 22:1 | unclassified | 0.0017  | 0.0009 | 4.67E-02 |
| 5p15.31 | PAPD7 | rs1566039 | SPM 17:0 / SPM 23:1 | unclassified | 0.0042  | 0.0015 | 3.98E-03 |
| 5p15.31 | PAPD7 | rs1566039 | SPM 17:0 / SPM 24:1 | unclassified | 0.0012  | 0.0004 | 1.96E-03 |
| 5p15.31 | PAPD7 | rs1566039 | SPM 17:0 / SPM 16:1 | unclassified | 0.0043  | 0.0012 | 5.54E-04 |

|         |        |           |                         |              |         |        |          |
|---------|--------|-----------|-------------------------|--------------|---------|--------|----------|
| 5p15.31 | PAPD7  | rs1566039 | SPM 17:0 / SPM dih 16:0 | unclassified | 0.0174  | 0.0066 | 8.80E-03 |
| 5p15.31 | PAPD7  | rs1566039 | SPM 17:0 / SPM 14:0     | elongation   | 0.0041  | 0.0022 | 5.79E-02 |
| 5p15.31 | PAPD7  | rs1566039 | SPM 17:0 / SPM 15:0     | elongation   | 0.0045  | 0.0027 | 8.89E-02 |
| 5p15.31 | PAPD7  | rs1566039 | SPM 17:0 / SPM 18:2     | unclassified | 0.1140  | 0.0416 | 6.20E-03 |
| 5p15.31 | PAPD7  | rs1566039 | SPM 17:0 / SPM 18:0     | elongation   | 0.0020  | 0.0009 | 1.93E-02 |
| 5p15.31 | PAPD7  | rs1566039 | SPM 17:0 / SPM dih 18:0 | unclassified | -0.0126 | 0.1202 | 9.17E-01 |
| 5p15.31 | PAPD7  | rs1566039 | SPM 17:0 / SPM 20:0     | elongation   | 0.0059  | 0.0036 | 1.01E-01 |
| 5p15.31 | PAPD7  | rs1566039 | SPM 17:0 / SPM 22:2     | unclassified | 0.0417  | 0.1166 | 7.20E-01 |
| 5p15.31 | PAPD7  | rs1566039 | SPM 17:0 / SPM 22:0     | elongation   | 0.0014  | 0.0009 | 1.10E-01 |
| 5p15.31 | PAPD7  | rs1566039 | SPM 17:0 / SPM dih 22:0 | unclassified | 0.1325  | 0.1571 | 3.99E-01 |
| 5p15.31 | PAPD7  | rs1566039 | SPM 17:0 / SPM 23:0     | elongation   | 0.0026  | 0.0015 | 8.68E-02 |
| 5p15.31 | PAPD7  | rs1566039 | SPM 17:0 / SPM dih 23:0 | unclassified | -0.3102 | 0.1969 | 1.15E-01 |
| 5p15.31 | PAPD7  | rs1566039 | SPM 17:0 / SPM 24:3     | unclassified | 0.0320  | 0.0341 | 3.47E-01 |
| 5p15.31 | PAPD7  | rs1566039 | SPM 17:0 / SPM 24:2     | unclassified | 0.0030  | 0.0009 | 7.24E-04 |
| 5p15.31 | PAPD7  | rs1566039 | SPM 17:0 / SPM 24:0     | elongation   | 0.0037  | 0.0013 | 5.40E-03 |
| 5p15.31 | PAPD7  | rs1566039 | SPM 17:0 / SPM dih 24:0 | unclassified | -0.0375 | 0.2489 | 8.80E-01 |
| 6p21.32 | AGPAT1 | rs1061808 | PC 32:0 / PC 26:0       | elongation   | -0.1283 | 0.6907 | 8.53E-01 |
| 6p21.32 | AGPAT1 | rs1061808 | PC 32:0 / PC 34:0       | elongation   | 0.0105  | 0.0642 | 8.70E-01 |
| 6p21.32 | AGPAT1 | rs1061808 | PC 32:0 / PC 36:0       | elongation   | -0.1494 | 0.0776 | 5.40E-02 |
| 6p21.32 | AGPAT1 | rs1061808 | PC 32:0 / PC 38:0       | elongation   | -0.0760 | 0.0290 | 8.71E-03 |
| 6p21.32 | AGPAT1 | rs1061808 | PC 32:0 / PC 40:0       | elongation   | -0.2102 | 0.1449 | 1.47E-01 |
| 6p21.32 | AGPAT1 | rs1061808 | PC 32:0 / PC 32:2       | saturation   | -0.0192 | 0.0397 | 6.29E-01 |
| 6p21.32 | AGPAT1 | rs1061808 | PC 32:0 / PC 32:1       | saturation   | -0.0196 | 0.0085 | 2.15E-02 |
| 6p21.32 | AGPAT1 | rs1061808 | PC 32:0 / PC 30:1       | unclassified | -0.4929 | 0.7887 | 5.32E-01 |
| 6p21.32 | AGPAT1 | rs1061808 | PC 32:0 / PC 30:0       | unclassified | 0.0199  | 0.0307 | 5.15E-01 |
| 6p21.32 | AGPAT1 | rs1061808 | PC 32:0 / PC O 32:1     | unclassified | -0.1419 | 0.0405 | 4.60E-04 |
| 6p21.32 | AGPAT1 | rs1061808 | PC 32:0 / PC O 32:0     | unclassified | -0.0293 | 0.0249 | 2.38E-01 |
| 6p21.32 | AGPAT1 | rs1061808 | PC 32:0 / PC O 34:3     | unclassified | -0.0554 | 0.0194 | 4.19E-03 |
| 6p21.32 | AGPAT1 | rs1061808 | PC 32:0 / PC O 34:2     | unclassified | -0.0142 | 0.0094 | 1.30E-01 |
| 6p21.32 | AGPAT1 | rs1061808 | PC 32:0 / PC O 34:1     | unclassified | -0.0323 | 0.0074 | 1.21E-05 |
| 6p21.32 | AGPAT1 | rs1061808 | PC 32:0 / PC O 34:0     | unclassified | -0.1918 | 0.0725 | 8.13E-03 |
| 6p21.32 | AGPAT1 | rs1061808 | PC 32:0 / PC 34:4       | unclassified | -0.1059 | 0.1005 | 2.92E-01 |
| 6p21.32 | AGPAT1 | rs1061808 | PC 32:0 / PC 34:3       | unclassified | -0.0144 | 0.0060 | 1.66E-02 |
| 6p21.32 | AGPAT1 | rs1061808 | PC 32:0 / PC 34:2       | unclassified | -0.0006 | 0.0002 | 1.27E-04 |
| 6p21.32 | AGPAT1 | rs1061808 | PC 32:0 / PC O 36:5     | unclassified | -0.0418 | 0.0103 | 5.08E-05 |
| 6p21.32 | AGPAT1 | rs1061808 | PC 32:0 / PC O 36:4     | unclassified | -0.0203 | 0.0063 | 1.19E-03 |
| 6p21.32 | AGPAT1 | rs1061808 | PC 32:0 / PC O 36:3     | unclassified | -0.0301 | 0.0138 | 2.90E-02 |
| 6p21.32 | AGPAT1 | rs1061808 | PC 32:0 / PC O 36:2     | unclassified | -0.0153 | 0.0079 | 5.28E-02 |
| 6p21.32 | AGPAT1 | rs1061808 | PC 32:0 / PC O 36:1     | unclassified | -0.0380 | 0.0103 | 2.10E-04 |
| 6p21.32 | AGPAT1 | rs1061808 | PC 32:0 / PC O 36:0     | unclassified | -0.5504 | 0.2767 | 4.67E-02 |
| 6p21.32 | AGPAT1 | rs1061808 | PC 32:0 / PC 36:5       | unclassified | -0.0075 | 0.0065 | 2.49E-01 |

|          |        |           |                     |              |         |        |          |
|----------|--------|-----------|---------------------|--------------|---------|--------|----------|
| 6p21.32  | AGPAT1 | rs1061808 | PC 32:0 / PC 36:4   | unclassified | -0.0015 | 0.0005 | 9.55E-04 |
| 6p21.32  | AGPAT1 | rs1061808 | PC 32:0 / PC 36:3   | unclassified | -0.0013 | 0.0006 | 2.08E-02 |
| 6p21.32  | AGPAT1 | rs1061808 | PC 32:0 / PC 36:2   | unclassified | -0.0010 | 0.0003 | 1.96E-03 |
| 6p21.32  | AGPAT1 | rs1061808 | PC 32:0 / PC 36:1   | unclassified | -0.0108 | 0.0023 | 2.19E-06 |
| 6p21.32  | AGPAT1 | rs1061808 | PC 32:0 / PC O 38:5 | unclassified | -0.0245 | 0.0058 | 2.76E-05 |
| 6p21.32  | AGPAT1 | rs1061808 | PC 32:0 / PC O 38:4 | unclassified | -0.0290 | 0.0087 | 8.06E-04 |
| 6p21.32  | AGPAT1 | rs1061808 | PC 32:0 / PC O 38:3 | unclassified | -0.0641 | 0.0264 | 1.51E-02 |
| 6p21.32  | AGPAT1 | rs1061808 | PC 32:0 / PC O 38:2 | unclassified | -0.0329 | 0.2319 | 8.87E-01 |
| 6p21.32  | AGPAT1 | rs1061808 | PC 32:0 / PC O 38:1 | unclassified | -0.6705 | 0.6436 | 2.98E-01 |
| 6p21.32  | AGPAT1 | rs1061808 | PC 32:0 / PC 38:7   | unclassified | -0.1569 | 0.0641 | 1.43E-02 |
| 6p21.32  | AGPAT1 | rs1061808 | PC 32:0 / PC 38:6   | unclassified | -0.0045 | 0.0013 | 5.71E-04 |
| 6p21.32  | AGPAT1 | rs1061808 | PC 32:0 / PC 38:5   | unclassified | -0.0062 | 0.0016 | 6.99E-05 |
| 6p21.32  | AGPAT1 | rs1061808 | PC 32:0 / PC 38:4   | unclassified | -0.0028 | 0.0010 | 3.43E-03 |
| 6p21.32  | AGPAT1 | rs1061808 | PC 32:0 / PC 38:3   | unclassified | -0.0049 | 0.0029 | 9.18E-02 |
| 6p21.32  | AGPAT1 | rs1061808 | PC 32:0 / PC 38:2   | unclassified | -0.1738 | 0.1276 | 1.73E-01 |
| 6p21.32  | AGPAT1 | rs1061808 | PC 32:0 / PC 38:1   | unclassified | -0.1316 | 0.0637 | 3.90E-02 |
| 6p21.32  | AGPAT1 | rs1061808 | PC 32:0 / PC O 40:6 | unclassified | -0.1040 | 0.0278 | 1.87E-04 |
| 6p21.32  | AGPAT1 | rs1061808 | PC 32:0 / PC O 40:5 | unclassified | -0.1269 | 0.0371 | 6.32E-04 |
| 6p21.32  | AGPAT1 | rs1061808 | PC 32:0 / PC O 40:4 | unclassified | -0.1937 | 0.0584 | 9.17E-04 |
| 6p21.32  | AGPAT1 | rs1061808 | PC 32:0 / PC 40:7   | unclassified | -0.0300 | 0.0173 | 8.34E-02 |
| 6p21.32  | AGPAT1 | rs1061808 | PC 32:0 / PC 40:6   | unclassified | -0.0151 | 0.0046 | 9.78E-04 |
| 6p21.32  | AGPAT1 | rs1061808 | PC 32:0 / PC 40:5   | unclassified | -0.0510 | 0.0108 | 2.30E-06 |
| 6p21.32  | AGPAT1 | rs1061808 | PC 32:0 / PC 40:4   | unclassified | -0.1339 | 0.0331 | 5.15E-05 |
| 6p21.32  | AGPAT1 | rs1061808 | PC 32:0 / PC 40:3   | unclassified | -0.2391 | 0.1366 | 8.00E-02 |
| 6p21.32  | AGPAT1 | rs1061808 | PC 32:0 / PC 40:2   | unclassified | -0.1145 | 0.1174 | 3.29E-01 |
| 6p21.32  | AGPAT1 | rs1061808 | PC 32:0 / PC 40:1   | unclassified | -0.0637 | 0.0735 | 3.86E-01 |
| 6p21.32  | AGPAT1 | rs1061808 | PC 32:0 / PC O 42:6 | unclassified | -0.4519 | 0.1602 | 4.78E-03 |
| 6p21.32  | AGPAT1 | rs1061808 | PC 32:0 / PC O 42:5 | unclassified | -0.1808 | 0.1090 | 9.70E-02 |
| 6p21.32  | AGPAT1 | rs1061808 | PC 32:0 / PC 42:5   | unclassified | -0.2687 | 0.1706 | 1.15E-01 |
| 6p21.32  | AGPAT1 | rs1061808 | PC 32:0 / PC 42:4   | unclassified | -0.8565 | 0.4100 | 3.67E-02 |
| 6p21.32  | AGPAT1 | rs1061808 | PC 32:0 / PC 34:1   | unclassified | -0.0024 | 0.0003 | 1.82E-14 |
| 10q24.31 | PKD2L1 | rs603424  | LPC 16:1 / LPC 18:1 | elongation   | -0.0057 | 0.0009 | 6.83E-11 |
| 10q24.31 | PKD2L1 | rs603424  | LPC 16:1 / LPC 15:0 | unclassified | -0.0810 | 0.0199 | 4.50E-05 |
| 10q24.31 | PKD2L1 | rs603424  | LPC 16:1 / LPC 18:3 | unclassified | -0.2538 | 0.0483 | 1.52E-07 |
| 10q24.31 | PKD2L1 | rs603424  | LPC 16:1 / LPC 18:2 | unclassified | -0.0059 | 0.0011 | 2.82E-08 |
| 10q24.31 | PKD2L1 | rs603424  | LPC 16:1 / LPC 18:0 | unclassified | -0.0024 | 0.0005 | 3.92E-07 |
| 10q24.31 | PKD2L1 | rs603424  | LPC 16:1 / LPC 20:5 | unclassified | -0.2217 | 0.0505 | 1.13E-05 |
| 10q24.31 | PKD2L1 | rs603424  | LPC 16:1 / LPC 20:4 | unclassified | -0.0229 | 0.0041 | 1.97E-08 |
| 10q24.31 | PKD2L1 | rs603424  | LPC 16:1 / LPC 20:3 | unclassified | -0.0584 | 0.0090 | 1.03E-10 |
| 10q24.31 | PKD2L1 | rs603424  | LPC 16:1 / LPC 20:0 | unclassified | -0.2269 | 0.0819 | 5.57E-03 |
| 10q24.31 | PKD2L1 | rs603424  | LPC 16:1 / LPC 22:6 | unclassified | -0.0919 | 0.0203 | 5.85E-06 |

|          |          |            |                     |              |         |        |          |
|----------|----------|------------|---------------------|--------------|---------|--------|----------|
| 10q24.31 | PKD2L1   | rs603424   | LPC 16:1 / LPC 22:5 | unclassified | -0.3135 | 0.0532 | 3.80E-09 |
| 10q24.31 | PKD2L1   | rs603424   | LPC 16:1 / LPC 22:4 | unclassified | -0.4582 | 0.1078 | 2.12E-05 |
| 10q24.31 | PKD2L1   | rs603424   | LPC 16:1 / LPC 22:0 | unclassified | -0.1342 | 0.0497 | 6.88E-03 |
| 10q24.31 | PKD2L1   | rs603424   | LPC 16:1 / LPC 16:0 | saturation   | -0.0009 | 0.0001 | 2.25E-15 |
| 10q25.3  | PNLIPRP1 | rs10885997 | PC 36:1 / PC 30:1   | elongation   | 1.7219  | 2.0456 | 4.00E-01 |
| 10q25.3  | PNLIPRP1 | rs10885997 | PC 36:1 / PC 32:1   | elongation   | -0.0589 | 0.0223 | 8.11E-03 |
| 10q25.3  | PNLIPRP1 | rs10885997 | PC 36:1 / PC 38:1   | elongation   | -0.1256 | 0.0949 | 1.85E-01 |
| 10q25.3  | PNLIPRP1 | rs10885997 | PC 36:1 / PC 40:1   | elongation   | -0.0848 | 0.1896 | 6.55E-01 |
| 10q25.3  | PNLIPRP1 | rs10885997 | PC 36:1 / PC 36:5   | saturation   | -0.0450 | 0.0183 | 1.42E-02 |
| 10q25.3  | PNLIPRP1 | rs10885997 | PC 36:1 / PC 36:4   | saturation   | -0.0057 | 0.0016 | 4.01E-04 |
| 10q25.3  | PNLIPRP1 | rs10885997 | PC 36:1 / PC 36:3   | saturation   | -0.0094 | 0.0016 | 8.72E-09 |
| 10q25.3  | PNLIPRP1 | rs10885997 | PC 36:1 / PC 36:2   | saturation   | -0.0034 | 0.0009 | 1.91E-04 |
| 10q25.3  | PNLIPRP1 | rs10885997 | PC 36:1 / PC 36:0   | saturation   | 0.1195  | 0.2250 | 5.95E-01 |
| 10q25.3  | PNLIPRP1 | rs10885997 | PC 36:1 / PC 26:0   | unclassified | 0.0452  | 1.7631 | 9.80E-01 |
| 10q25.3  | PNLIPRP1 | rs10885997 | PC 36:1 / PC 30:0   | unclassified | -0.1133 | 0.0952 | 2.34E-01 |
| 10q25.3  | PNLIPRP1 | rs10885997 | PC 36:1 / PC O 32:1 | unclassified | -0.3872 | 0.1441 | 7.22E-03 |
| 10q25.3  | PNLIPRP1 | rs10885997 | PC 36:1 / PC O 32:0 | unclassified | -0.2177 | 0.1010 | 3.12E-02 |
| 10q25.3  | PNLIPRP1 | rs10885997 | PC 36:1 / PC 32:2   | unclassified | -0.3321 | 0.1159 | 4.17E-03 |
| 10q25.3  | PNLIPRP1 | rs10885997 | PC 36:1 / PC 32:0   | unclassified | -0.0678 | 0.0165 | 3.93E-05 |
| 10q25.3  | PNLIPRP1 | rs10885997 | PC 36:1 / PC O 34:3 | unclassified | -0.1579 | 0.0605 | 9.08E-03 |
| 10q25.3  | PNLIPRP1 | rs10885997 | PC 36:1 / PC O 34:2 | unclassified | -0.1002 | 0.0323 | 1.95E-03 |
| 10q25.3  | PNLIPRP1 | rs10885997 | PC 36:1 / PC O 34:1 | unclassified | -0.1007 | 0.0257 | 9.20E-05 |
| 10q25.3  | PNLIPRP1 | rs10885997 | PC 36:1 / PC O 34:0 | unclassified | -0.1108 | 0.2225 | 6.18E-01 |
| 10q25.3  | PNLIPRP1 | rs10885997 | PC 36:1 / PC 34:4   | unclassified | -0.6222 | 0.2707 | 2.15E-02 |
| 10q25.3  | PNLIPRP1 | rs10885997 | PC 36:1 / PC 34:2   | unclassified | -0.0033 | 0.0006 | 2.29E-08 |
| 10q25.3  | PNLIPRP1 | rs10885997 | PC 36:1 / PC 34:0   | unclassified | -0.1941 | 0.1847 | 2.93E-01 |
| 10q25.3  | PNLIPRP1 | rs10885997 | PC 36:1 / PC O 36:5 | unclassified | -0.0825 | 0.0345 | 1.67E-02 |
| 10q25.3  | PNLIPRP1 | rs10885997 | PC 36:1 / PC O 36:4 | unclassified | -0.0888 | 0.0216 | 4.00E-05 |
| 10q25.3  | PNLIPRP1 | rs10885997 | PC 36:1 / PC O 36:3 | unclassified | -0.1515 | 0.0436 | 5.13E-04 |
| 10q25.3  | PNLIPRP1 | rs10885997 | PC 36:1 / PC O 36:2 | unclassified | -0.0760 | 0.0260 | 3.47E-03 |
| 10q25.3  | PNLIPRP1 | rs10885997 | PC 36:1 / PC O 36:1 | unclassified | -0.1020 | 0.0304 | 8.00E-04 |
| 10q25.3  | PNLIPRP1 | rs10885997 | PC 36:1 / PC O 36:0 | unclassified | 0.2959  | 0.6824 | 6.65E-01 |
| 10q25.3  | PNLIPRP1 | rs10885997 | PC 36:1 / PC O 38:5 | unclassified | -0.0714 | 0.0209 | 6.26E-04 |
| 10q25.3  | PNLIPRP1 | rs10885997 | PC 36:1 / PC O 38:4 | unclassified | -0.0928 | 0.0288 | 1.30E-03 |
| 10q25.3  | PNLIPRP1 | rs10885997 | PC 36:1 / PC O 38:3 | unclassified | -0.1424 | 0.0789 | 7.13E-02 |
| 10q25.3  | PNLIPRP1 | rs10885997 | PC 36:1 / PC O 38:2 | unclassified | 0.0492  | 0.5562 | 9.30E-01 |
| 10q25.3  | PNLIPRP1 | rs10885997 | PC 36:1 / PC O 38:1 | unclassified | 0.5036  | 1.5998 | 7.53E-01 |
| 10q25.3  | PNLIPRP1 | rs10885997 | PC 36:1 / PC 38:7   | unclassified | -0.2279 | 0.1893 | 2.29E-01 |
| 10q25.3  | PNLIPRP1 | rs10885997 | PC 36:1 / PC 38:6   | unclassified | -0.0113 | 0.0044 | 9.91E-03 |
| 10q25.3  | PNLIPRP1 | rs10885997 | PC 36:1 / PC 38:5   | unclassified | -0.0109 | 0.0045 | 1.61E-02 |
| 10q25.3  | PNLIPRP1 | rs10885997 | PC 36:1 / PC 38:4   | unclassified | -0.0054 | 0.0028 | 4.85E-02 |



|         |          |            |                       |              |         |        |          |
|---------|----------|------------|-----------------------|--------------|---------|--------|----------|
| 10q25.3 | PNLIPRP1 | rs10885997 | PC 36:1 / PC 38:3     | unclassified | -0.0075 | 0.0066 | 2.60E-01 |
| 10q25.3 | PNLIPRP1 | rs10885997 | PC 36:1 / PC 38:2     | unclassified | -0.1623 | 0.2530 | 5.21E-01 |
| 10q25.3 | PNLIPRP1 | rs10885997 | PC 36:1 / PC 38:0     | unclassified | -0.1390 | 0.0658 | 3.45E-02 |
| 10q25.3 | PNLIPRP1 | rs10885997 | PC 36:1 / PC O 40:6   | unclassified | -0.0903 | 0.0923 | 3.28E-01 |
| 10q25.3 | PNLIPRP1 | rs10885997 | PC 36:1 / PC O 40:5   | unclassified | -0.3493 | 0.1163 | 2.68E-03 |
| 10q25.3 | PNLIPRP1 | rs10885997 | PC 36:1 / PC O 40:4   | unclassified | -0.3819 | 0.1757 | 2.98E-02 |
| 10q25.3 | PNLIPRP1 | rs10885997 | PC 36:1 / PC 40:7     | unclassified | -0.1540 | 0.0528 | 3.52E-03 |
| 10q25.3 | PNLIPRP1 | rs10885997 | PC 36:1 / PC 40:6     | unclassified | -0.0203 | 0.0132 | 1.25E-01 |
| 10q25.3 | PNLIPRP1 | rs10885997 | PC 36:1 / PC 40:5     | unclassified | -0.0410 | 0.0274 | 1.35E-01 |
| 10q25.3 | PNLIPRP1 | rs10885997 | PC 36:1 / PC 40:4     | unclassified | -0.1008 | 0.0855 | 2.38E-01 |
| 10q25.3 | PNLIPRP1 | rs10885997 | PC 36:1 / PC 40:3     | unclassified | -0.4902 | 0.2405 | 4.15E-02 |
| 10q25.3 | PNLIPRP1 | rs10885997 | PC 36:1 / PC 40:2     | unclassified | -0.7865 | 0.3095 | 1.11E-02 |
| 10q25.3 | PNLIPRP1 | rs10885997 | PC 36:1 / PC 40:0     | unclassified | -0.4509 | 0.3965 | 2.55E-01 |
| 10q25.3 | PNLIPRP1 | rs10885997 | PC 36:1 / PC O 42:6   | unclassified | -1.0469 | 0.4987 | 3.58E-02 |
| 10q25.3 | PNLIPRP1 | rs10885997 | PC 36:1 / PC O 42:5   | unclassified | -0.7446 | 0.3480 | 3.24E-02 |
| 10q25.3 | PNLIPRP1 | rs10885997 | PC 36:1 / PC 42:5     | unclassified | -0.5844 | 0.4897 | 2.33E-01 |
| 10q25.3 | PNLIPRP1 | rs10885997 | PC 36:1 / PC 42:4     | unclassified | -1.0514 | 1.1280 | 3.51E-01 |
| 10q25.3 | PNLIPRP1 | rs10885997 | PC 36:1 / PC 34:1     | elongation   | -0.0048 | 0.0008 | 3.28E-10 |
| 10q25.3 | PNLIPRP1 | rs10885997 | PC 36:1 / PC 34:3     | unclassified | -0.0992 | 0.0163 | 1.15E-09 |
| 11p15.4 | SYT9     | rs10769780 | PC O 42:6 / PC O 40:6 | elongation   | 0.0036  | 0.0020 | 6.67E-02 |
| 11p15.4 | SYT9     | rs10769780 | PC O 42:6 / PC O 42:5 | saturation   | 0.0176  | 0.0068 | 9.96E-03 |
| 11p15.4 | SYT9     | rs10769780 | PC O 42:6 / PC 26:0   | unclassified | 0.0622  | 0.0569 | 2.75E-01 |
| 11p15.4 | SYT9     | rs10769780 | PC O 42:6 / PC 30:1   | unclassified | 0.0204  | 0.0594 | 7.31E-01 |
| 11p15.4 | SYT9     | rs10769780 | PC O 42:6 / PC 30:0   | unclassified | 0.0063  | 0.0036 | 7.88E-02 |
| 11p15.4 | SYT9     | rs10769780 | PC O 42:6 / PC O 32:1 | unclassified | 0.0089  | 0.0038 | 1.84E-02 |
| 11p15.4 | SYT9     | rs10769780 | PC O 42:6 / PC O 32:0 | unclassified | 0.0090  | 0.0029 | 1.77E-03 |
| 11p15.4 | SYT9     | rs10769780 | PC O 42:6 / PC 32:2   | unclassified | 0.0048  | 0.0038 | 2.11E-01 |
| 11p15.4 | SYT9     | rs10769780 | PC O 42:6 / PC 32:1   | unclassified | 0.0019  | 0.0010 | 6.01E-02 |
| 11p15.4 | SYT9     | rs10769780 | PC O 42:6 / PC 32:0   | unclassified | 0.0016  | 0.0006 | 1.24E-02 |
| 11p15.4 | SYT9     | rs10769780 | PC O 42:6 / PC O 34:3 | unclassified | 0.0038  | 0.0015 | 1.16E-02 |
| 11p15.4 | SYT9     | rs10769780 | PC O 42:6 / PC O 34:2 | unclassified | 0.0032  | 0.0009 | 2.12E-04 |
| 11p15.4 | SYT9     | rs10769780 | PC O 42:6 / PC O 34:1 | unclassified | 0.0031  | 0.0010 | 1.70E-03 |
| 11p15.4 | SYT9     | rs10769780 | PC O 42:6 / PC O 34:0 | unclassified | 0.0216  | 0.0074 | 3.37E-03 |
| 11p15.4 | SYT9     | rs10769780 | PC O 42:6 / PC 34:4   | unclassified | 0.0177  | 0.0098 | 7.00E-02 |
| 11p15.4 | SYT9     | rs10769780 | PC O 42:6 / PC 34:3   | unclassified | 0.0020  | 0.0008 | 8.19E-03 |
| 11p15.4 | SYT9     | rs10769780 | PC O 42:6 / PC 34:2   | unclassified | 0.0001  | 0.0000 | 9.86E-04 |
| 11p15.4 | SYT9     | rs10769780 | PC O 42:6 / PC 34:1   | unclassified | 0.0001  | 0.0001 | 5.50E-03 |
| 11p15.4 | SYT9     | rs10769780 | PC O 42:6 / PC 34:0   | unclassified | 0.0072  | 0.0042 | 8.52E-02 |
| 11p15.4 | SYT9     | rs10769780 | PC O 42:6 / PC O 36:5 | unclassified | 0.0022  | 0.0009 | 1.59E-02 |
| 11p15.4 | SYT9     | rs10769780 | PC O 42:6 / PC O 36:4 | unclassified | 0.0017  | 0.0006 | 3.66E-03 |
| 11p15.4 | SYT9     | rs10769780 | PC O 42:6 / PC O 36:3 | unclassified | 0.0053  | 0.0013 | 3.62E-05 |

|         |         |            |                       |              |         |        |          |
|---------|---------|------------|-----------------------|--------------|---------|--------|----------|
| 11p15.4 | SYT9    | rs10769780 | PC O 42:6 / PC O 36:2 | unclassified | 0.0025  | 0.0007 | 3.86E-04 |
| 11p15.4 | SYT9    | rs10769780 | PC O 42:6 / PC O 36:1 | unclassified | 0.0038  | 0.0011 | 8.95E-04 |
| 11p15.4 | SYT9    | rs10769780 | PC O 42:6 / PC O 36:0 | unclassified | 0.0238  | 0.0205 | 2.46E-01 |
| 11p15.4 | SYT9    | rs10769780 | PC O 42:6 / PC 36:5   | unclassified | 0.0009  | 0.0006 | 1.30E-01 |
| 11p15.4 | SYT9    | rs10769780 | PC O 42:6 / PC 36:4   | unclassified | 0.0001  | 0.0001 | 4.87E-02 |
| 11p15.4 | SYT9    | rs10769780 | PC O 42:6 / PC 36:3   | unclassified | 0.0003  | 0.0001 | 1.16E-03 |
| 11p15.4 | SYT9    | rs10769780 | PC O 42:6 / PC 36:2   | unclassified | 0.0002  | 0.0000 | 5.58E-05 |
| 11p15.4 | SYT9    | rs10769780 | PC O 42:6 / PC 36:1   | unclassified | 0.0010  | 0.0003 | 2.00E-04 |
| 11p15.4 | SYT9    | rs10769780 | PC O 42:6 / PC 36:0   | unclassified | 0.0139  | 0.0054 | 1.01E-02 |
| 11p15.4 | SYT9    | rs10769780 | PC O 42:6 / PC O 38:5 | unclassified | 0.0015  | 0.0005 | 4.87E-03 |
| 11p15.4 | SYT9    | rs10769780 | PC O 42:6 / PC O 38:4 | unclassified | 0.0020  | 0.0007 | 6.54E-03 |
| 11p15.4 | SYT9    | rs10769780 | PC O 42:6 / PC O 38:3 | unclassified | 0.0073  | 0.0024 | 1.95E-03 |
| 11p15.4 | SYT9    | rs10769780 | PC O 42:6 / PC O 38:2 | unclassified | 0.0307  | 0.0150 | 4.10E-02 |
| 11p15.4 | SYT9    | rs10769780 | PC O 42:6 / PC O 38:1 | unclassified | 0.0423  | 0.0463 | 3.60E-01 |
| 11p15.4 | SYT9    | rs10769780 | PC O 42:6 / PC 38:7   | unclassified | 0.0047  | 0.0051 | 3.60E-01 |
| 11p15.4 | SYT9    | rs10769780 | PC O 42:6 / PC 38:6   | unclassified | 0.0003  | 0.0001 | 3.21E-02 |
| 11p15.4 | SYT9    | rs10769780 | PC O 42:6 / PC 38:5   | unclassified | 0.0003  | 0.0002 | 4.58E-02 |
| 11p15.4 | SYT9    | rs10769780 | PC O 42:6 / PC 38:4   | unclassified | 0.0002  | 0.0001 | 1.49E-02 |
| 11p15.4 | SYT9    | rs10769780 | PC O 42:6 / PC 38:3   | unclassified | 0.0010  | 0.0003 | 7.79E-04 |
| 11p15.4 | SYT9    | rs10769780 | PC O 42:6 / PC 38:2   | unclassified | 0.0036  | 0.0074 | 6.24E-01 |
| 11p15.4 | SYT9    | rs10769780 | PC O 42:6 / PC 38:1   | unclassified | 0.0046  | 0.0024 | 5.35E-02 |
| 11p15.4 | SYT9    | rs10769780 | PC O 42:6 / PC 38:0   | unclassified | 0.0052  | 0.0019 | 5.73E-03 |
| 11p15.4 | SYT9    | rs10769780 | PC O 42:6 / PC O 40:5 | unclassified | 0.0066  | 0.0026 | 1.01E-02 |
| 11p15.4 | SYT9    | rs10769780 | PC O 42:6 / PC O 40:4 | unclassified | 0.0098  | 0.0041 | 1.59E-02 |
| 11p15.4 | SYT9    | rs10769780 | PC O 42:6 / PC 40:7   | unclassified | 0.0032  | 0.0015 | 3.08E-02 |
| 11p15.4 | SYT9    | rs10769780 | PC O 42:6 / PC 40:6   | unclassified | 0.0009  | 0.0004 | 2.28E-02 |
| 11p15.4 | SYT9    | rs10769780 | PC O 42:6 / PC 40:5   | unclassified | 0.0023  | 0.0011 | 3.46E-02 |
| 11p15.4 | SYT9    | rs10769780 | PC O 42:6 / PC 40:4   | unclassified | 0.0056  | 0.0030 | 6.73E-02 |
| 11p15.4 | SYT9    | rs10769780 | PC O 42:6 / PC 40:3   | unclassified | 0.0098  | 0.0065 | 1.35E-01 |
| 11p15.4 | SYT9    | rs10769780 | PC O 42:6 / PC 40:2   | unclassified | 0.0244  | 0.0089 | 5.92E-03 |
| 11p15.4 | SYT9    | rs10769780 | PC O 42:6 / PC 40:1   | unclassified | 0.0158  | 0.0053 | 2.83E-03 |
| 11p15.4 | SYT9    | rs10769780 | PC O 42:6 / PC 40:0   | unclassified | 0.0214  | 0.0111 | 5.33E-02 |
| 11p15.4 | SYT9    | rs10769780 | PC O 42:6 / PC 42:5   | unclassified | 0.0096  | 0.0126 | 4.46E-01 |
| 11p15.4 | SYT9    | rs10769780 | PC O 42:6 / PC 42:4   | unclassified | 0.0525  | 0.0295 | 7.52E-02 |
| 11q12.1 | OR5AQ1P | rs2945816  | PC 26:0 / PC 30:0     | elongation   | -0.0438 | 0.0092 | 2.14E-06 |
| 11q12.1 | OR5AQ1P | rs2945816  | PC 26:0 / PC 32:0     | elongation   | -0.0130 | 0.0025 | 2.07E-07 |
| 11q12.1 | OR5AQ1P | rs2945816  | PC 26:0 / PC 34:0     | elongation   | -0.0572 | 0.0135 | 2.11E-05 |
| 11q12.1 | OR5AQ1P | rs2945816  | PC 26:0 / PC 38:0     | elongation   | -0.0353 | 0.0073 | 1.38E-06 |
| 11q12.1 | OR5AQ1P | rs2945816  | PC 26:0 / PC 40:0     | elongation   | -0.1889 | 0.0402 | 2.67E-06 |
| 11q12.1 | OR5AQ1P | rs2945816  | PC 26:0 / PC 30:1     | unclassified | -0.1163 | 0.1206 | 3.35E-01 |
| 11q12.1 | OR5AQ1P | rs2945816  | PC 26:0 / PC O 32:1   | unclassified | -0.0634 | 0.0150 | 2.42E-05 |

|         |         |           |                     |              |         |        |          |
|---------|---------|-----------|---------------------|--------------|---------|--------|----------|
| 11q12.1 | OR5AQ1P | rs2945816 | PC 26:0 / PC O 32:0 | unclassified | -0.0515 | 0.0108 | 1.79E-06 |
| 11q12.1 | OR5AQ1P | rs2945816 | PC 26:0 / PC 32:2   | unclassified | -0.0313 | 0.0093 | 7.27E-04 |
| 11q12.1 | OR5AQ1P | rs2945816 | PC 26:0 / PC 32:1   | unclassified | -0.0139 | 0.0025 | 2.24E-08 |
| 11q12.1 | OR5AQ1P | rs2945816 | PC 26:0 / PC O 34:3 | unclassified | -0.0187 | 0.0057 | 9.34E-04 |
| 11q12.1 | OR5AQ1P | rs2945816 | PC 26:0 / PC O 34:2 | unclassified | -0.0136 | 0.0033 | 4.40E-05 |
| 11q12.1 | OR5AQ1P | rs2945816 | PC 26:0 / PC O 34:1 | unclassified | -0.0196 | 0.0037 | 9.07E-08 |
| 11q12.1 | OR5AQ1P | rs2945816 | PC 26:0 / PC O 34:0 | unclassified | -0.1204 | 0.0246 | 9.41E-07 |
| 11q12.1 | OR5AQ1P | rs2945816 | PC 26:0 / PC 34:4   | unclassified | -0.1069 | 0.0256 | 3.00E-05 |
| 11q12.1 | OR5AQ1P | rs2945816 | PC 26:0 / PC 34:3   | unclassified | -0.0101 | 0.0023 | 1.33E-05 |
| 11q12.1 | OR5AQ1P | rs2945816 | PC 26:0 / PC 34:2   | unclassified | -0.0003 | 0.0001 | 1.33E-05 |
| 11q12.1 | OR5AQ1P | rs2945816 | PC 26:0 / PC 34:1   | unclassified | -0.0009 | 0.0002 | 3.32E-08 |
| 11q12.1 | OR5AQ1P | rs2945816 | PC 26:0 / PC O 36:5 | unclassified | -0.0193 | 0.0041 | 1.83E-06 |
| 11q12.1 | OR5AQ1P | rs2945816 | PC 26:0 / PC O 36:4 | unclassified | -0.0134 | 0.0026 | 2.07E-07 |
| 11q12.1 | OR5AQ1P | rs2945816 | PC 26:0 / PC O 36:3 | unclassified | -0.0248 | 0.0053 | 2.57E-06 |
| 11q12.1 | OR5AQ1P | rs2945816 | PC 26:0 / PC O 36:2 | unclassified | -0.0123 | 0.0027 | 4.57E-06 |
| 11q12.1 | OR5AQ1P | rs2945816 | PC 26:0 / PC O 36:1 | unclassified | -0.0215 | 0.0041 | 1.85E-07 |
| 11q12.1 | OR5AQ1P | rs2945816 | PC 26:0 / PC O 36:0 | unclassified | -0.3439 | 0.0695 | 7.50E-07 |
| 11q12.1 | OR5AQ1P | rs2945816 | PC 26:0 / PC 36:4   | unclassified | -0.0011 | 0.0002 | 2.76E-07 |
| 11q12.1 | OR5AQ1P | rs2945816 | PC 26:0 / PC 36:3   | unclassified | -0.0013 | 0.0003 | 2.81E-06 |
| 11q12.1 | OR5AQ1P | rs2945816 | PC 26:0 / PC 36:2   | unclassified | -0.0007 | 0.0001 | 2.40E-06 |
| 11q12.1 | OR5AQ1P | rs2945816 | PC 26:0 / PC 36:0   | unclassified | -0.0501 | 0.0172 | 3.62E-03 |
| 11q12.1 | OR5AQ1P | rs2945816 | PC 26:0 / PC O 38:5 | unclassified | -0.0145 | 0.0027 | 1.08E-07 |
| 11q12.1 | OR5AQ1P | rs2945816 | PC 26:0 / PC O 38:4 | unclassified | -0.0190 | 0.0035 | 5.52E-08 |
| 11q12.1 | OR5AQ1P | rs2945816 | PC 26:0 / PC O 38:3 | unclassified | -0.0430 | 0.0090 | 1.91E-06 |
| 11q12.1 | OR5AQ1P | rs2945816 | PC 26:0 / PC O 38:2 | unclassified | -0.0987 | 0.0411 | 1.63E-02 |
| 11q12.1 | OR5AQ1P | rs2945816 | PC 26:0 / PC O 38:1 | unclassified | -0.1692 | 0.1134 | 1.36E-01 |
| 11q12.1 | OR5AQ1P | rs2945816 | PC 26:0 / PC 38:7   | unclassified | -0.0801 | 0.0200 | 6.02E-05 |
| 11q12.1 | OR5AQ1P | rs2945816 | PC 26:0 / PC 38:6   | unclassified | -0.0028 | 0.0005 | 3.43E-08 |
| 11q12.1 | OR5AQ1P | rs2945816 | PC 26:0 / PC 38:3   | unclassified | -0.0053 | 0.0010 | 4.50E-08 |
| 11q12.1 | OR5AQ1P | rs2945816 | PC 26:0 / PC 38:2   | unclassified | -0.0569 | 0.0207 | 6.00E-03 |
| 11q12.1 | OR5AQ1P | rs2945816 | PC 26:0 / PC 38:1   | unclassified | -0.0189 | 0.0066 | 4.29E-03 |
| 11q12.1 | OR5AQ1P | rs2945816 | PC 26:0 / PC O 40:6 | unclassified | -0.0543 | 0.0110 | 7.58E-07 |
| 11q12.1 | OR5AQ1P | rs2945816 | PC 26:0 / PC O 40:5 | unclassified | -0.0650 | 0.0138 | 2.49E-06 |
| 11q12.1 | OR5AQ1P | rs2945816 | PC 26:0 / PC O 40:4 | unclassified | -0.0891 | 0.0210 | 2.10E-05 |
| 11q12.1 | OR5AQ1P | rs2945816 | PC 26:0 / PC 40:5   | unclassified | -0.0220 | 0.0040 | 3.78E-08 |
| 11q12.1 | OR5AQ1P | rs2945816 | PC 26:0 / PC 40:4   | unclassified | -0.0558 | 0.0111 | 4.79E-07 |
| 11q12.1 | OR5AQ1P | rs2945816 | PC 26:0 / PC 40:3   | unclassified | -0.0602 | 0.0189 | 1.47E-03 |
| 11q12.1 | OR5AQ1P | rs2945816 | PC 26:0 / PC 40:2   | unclassified | -0.0825 | 0.0245 | 7.42E-04 |
| 11q12.1 | OR5AQ1P | rs2945816 | PC 26:0 / PC 40:1   | unclassified | -0.0356 | 0.0149 | 1.71E-02 |
| 11q12.1 | OR5AQ1P | rs2945816 | PC 26:0 / PC O 42:6 | unclassified | -0.2545 | 0.0483 | 1.40E-07 |
| 11q12.1 | OR5AQ1P | rs2945816 | PC 26:0 / PC O 42:5 | unclassified | -0.1435 | 0.0346 | 3.28E-05 |

|         |         |            |                       |              |         |        |          |
|---------|---------|------------|-----------------------|--------------|---------|--------|----------|
| 11q12.1 | OR5AQ1P | rs2945816  | PC 26:0 / PC 42:5     | unclassified | -0.1834 | 0.0449 | 4.32E-05 |
| 11q12.1 | OR5AQ1P | rs2945816  | PC 26:0 / PC 42:4     | unclassified | -0.4219 | 0.0834 | 4.17E-07 |
| 11q12.1 | OR5AQ1P | rs2945816  | PC 26:0 / PC 36:5     | unclassified | -0.0105 | 0.0019 | 1.92E-08 |
| 11q12.1 | OR5AQ1P | rs2945816  | PC 26:0 / PC 36:1     | unclassified | -0.0053 | 0.0009 | 2.93E-09 |
| 11q12.1 | OR5AQ1P | rs2945816  | PC 26:0 / PC 38:5     | unclassified | -0.0039 | 0.0007 | 1.21E-08 |
| 11q12.1 | OR5AQ1P | rs2945816  | PC 26:0 / PC 38:4     | unclassified | -0.0022 | 0.0004 | 9.31E-09 |
| 11q12.1 | OR5AQ1P | rs2945816  | PC 26:0 / PC 40:7     | unclassified | -0.0393 | 0.0069 | 1.12E-08 |
| 11q12.1 | OR5AQ1P | rs2945816  | PC 26:0 / PC 40:6     | unclassified | -0.0098 | 0.0017 | 7.27E-09 |
| 11q14.1 | DLG2    | rs17148090 | PC O 42:5 / PC O 36:5 | elongation   | -0.0088 | 0.0024 | 2.35E-04 |
| 11q14.1 | DLG2    | rs17148090 | PC O 42:5 / PC O 38:5 | elongation   | -0.0038 | 0.0013 | 3.26E-03 |
| 11q14.1 | DLG2    | rs17148090 | PC O 42:5 / PC O 40:5 | elongation   | -0.0186 | 0.0058 | 1.34E-03 |
| 11q14.1 | DLG2    | rs17148090 | PC O 42:5 / PC O 42:6 | saturation   | -0.0451 | 0.0235 | 5.48E-02 |
| 11q14.1 | DLG2    | rs17148090 | PC O 42:5 / PC 26:0   | unclassified | -0.2542 | 0.1525 | 9.57E-02 |
| 11q14.1 | DLG2    | rs17148090 | PC O 42:5 / PC 30:1   | unclassified | -0.1194 | 0.1546 | 4.40E-01 |
| 11q14.1 | DLG2    | rs17148090 | PC O 42:5 / PC 30:0   | unclassified | -0.0114 | 0.0087 | 1.87E-01 |
| 11q14.1 | DLG2    | rs17148090 | PC O 42:5 / PC O 32:1 | unclassified | -0.0191 | 0.0094 | 4.27E-02 |
| 11q14.1 | DLG2    | rs17148090 | PC O 42:5 / PC O 32:0 | unclassified | -0.0093 | 0.0067 | 1.68E-01 |
| 11q14.1 | DLG2    | rs17148090 | PC O 42:5 / PC 32:2   | unclassified | -0.0236 | 0.0100 | 1.78E-02 |
| 11q14.1 | DLG2    | rs17148090 | PC O 42:5 / PC 32:1   | unclassified | -0.0068 | 0.0024 | 4.24E-03 |
| 11q14.1 | DLG2    | rs17148090 | PC O 42:5 / PC 32:0   | unclassified | -0.0050 | 0.0015 | 1.02E-03 |
| 11q14.1 | DLG2    | rs17148090 | PC O 42:5 / PC O 34:3 | unclassified | -0.0126 | 0.0039 | 1.39E-03 |
| 11q14.1 | DLG2    | rs17148090 | PC O 42:5 / PC O 34:2 | unclassified | -0.0077 | 0.0021 | 3.02E-04 |
| 11q14.1 | DLG2    | rs17148090 | PC O 42:5 / PC O 34:1 | unclassified | -0.0056 | 0.0022 | 1.15E-02 |
| 11q14.1 | DLG2    | rs17148090 | PC O 42:5 / PC O 34:0 | unclassified | -0.0277 | 0.0179 | 1.23E-01 |
| 11q14.1 | DLG2    | rs17148090 | PC O 42:5 / PC 34:4   | unclassified | -0.0857 | 0.0246 | 4.89E-04 |
| 11q14.1 | DLG2    | rs17148090 | PC O 42:5 / PC 34:3   | unclassified | -0.0051 | 0.0019 | 6.18E-03 |
| 11q14.1 | DLG2    | rs17148090 | PC O 42:5 / PC 34:2   | unclassified | -0.0002 | 0.0001 | 3.09E-04 |
| 11q14.1 | DLG2    | rs17148090 | PC O 42:5 / PC 34:1   | unclassified | -0.0004 | 0.0001 | 7.25E-04 |
| 11q14.1 | DLG2    | rs17148090 | PC O 42:5 / PC 34:0   | unclassified | -0.0198 | 0.0118 | 9.21E-02 |
| 11q14.1 | DLG2    | rs17148090 | PC O 42:5 / PC O 36:4 | unclassified | -0.0049 | 0.0014 | 5.69E-04 |
| 11q14.1 | DLG2    | rs17148090 | PC O 42:5 / PC O 36:3 | unclassified | -0.0110 | 0.0032 | 5.33E-04 |
| 11q14.1 | DLG2    | rs17148090 | PC O 42:5 / PC O 36:2 | unclassified | -0.0060 | 0.0017 | 5.18E-04 |
| 11q14.1 | DLG2    | rs17148090 | PC O 42:5 / PC O 36:1 | unclassified | -0.0092 | 0.0026 | 4.95E-04 |
| 11q14.1 | DLG2    | rs17148090 | PC O 42:5 / PC O 36:0 | unclassified | -0.0308 | 0.0516 | 5.51E-01 |
| 11q14.1 | DLG2    | rs17148090 | PC O 42:5 / PC 36:5   | unclassified | -0.0043 | 0.0016 | 5.20E-03 |
| 11q14.1 | DLG2    | rs17148090 | PC O 42:5 / PC 36:4   | unclassified | -0.0006 | 0.0001 | 1.30E-05 |
| 11q14.1 | DLG2    | rs17148090 | PC O 42:5 / PC 36:3   | unclassified | -0.0008 | 0.0002 | 6.94E-05 |
| 11q14.1 | DLG2    | rs17148090 | PC O 42:5 / PC 36:2   | unclassified | -0.0004 | 0.0001 | 8.48E-05 |
| 11q14.1 | DLG2    | rs17148090 | PC O 42:5 / PC 36:1   | unclassified | -0.0021 | 0.0007 | 9.44E-04 |
| 11q14.1 | DLG2    | rs17148090 | PC O 42:5 / PC 36:0   | unclassified | 0.0012  | 0.0143 | 9.35E-01 |
| 11q14.1 | DLG2    | rs17148090 | PC O 42:5 / PC O 38:4 | unclassified | -0.0055 | 0.0017 | 1.42E-03 |

|         |       |            |                       |              |         |        |          |
|---------|-------|------------|-----------------------|--------------|---------|--------|----------|
| 11q14.1 | DLG2  | rs17148090 | PC O 42:5 / PC O 38:3 | unclassified | -0.0181 | 0.0054 | 8.33E-04 |
| 11q14.1 | DLG2  | rs17148090 | PC O 42:5 / PC O 38:2 | unclassified | 0.0045  | 0.0355 | 8.99E-01 |
| 11q14.1 | DLG2  | rs17148090 | PC O 42:5 / PC O 38:1 | unclassified | -0.1669 | 0.1201 | 1.65E-01 |
| 11q14.1 | DLG2  | rs17148090 | PC O 42:5 / PC 38:7   | unclassified | -0.0465 | 0.0137 | 6.74E-04 |
| 11q14.1 | DLG2  | rs17148090 | PC O 42:5 / PC 38:6   | unclassified | -0.0010 | 0.0003 | 1.60E-03 |
| 11q14.1 | DLG2  | rs17148090 | PC O 42:5 / PC 38:5   | unclassified | -0.0015 | 0.0004 | 4.28E-04 |
| 11q14.1 | DLG2  | rs17148090 | PC O 42:5 / PC 38:4   | unclassified | -0.0010 | 0.0002 | 2.00E-05 |
| 11q14.1 | DLG2  | rs17148090 | PC O 42:5 / PC 38:3   | unclassified | -0.0028 | 0.0007 | 1.39E-04 |
| 11q14.1 | DLG2  | rs17148090 | PC O 42:5 / PC 38:2   | unclassified | -0.0032 | 0.0195 | 8.68E-01 |
| 11q14.1 | DLG2  | rs17148090 | PC O 42:5 / PC 38:1   | unclassified | -0.0009 | 0.0066 | 8.88E-01 |
| 11q14.1 | DLG2  | rs17148090 | PC O 42:5 / PC 38:0   | unclassified | -0.0075 | 0.0052 | 1.50E-01 |
| 11q14.1 | DLG2  | rs17148090 | PC O 42:5 / PC O 40:6 | unclassified | -0.0114 | 0.0053 | 3.23E-02 |
| 11q14.1 | DLG2  | rs17148090 | PC O 42:5 / PC O 40:4 | unclassified | -0.0303 | 0.0091 | 8.13E-04 |
| 11q14.1 | DLG2  | rs17148090 | PC O 42:5 / PC 40:7   | unclassified | -0.0125 | 0.0040 | 1.84E-03 |
| 11q14.1 | DLG2  | rs17148090 | PC O 42:5 / PC 40:6   | unclassified | -0.0038 | 0.0011 | 4.32E-04 |
| 11q14.1 | DLG2  | rs17148090 | PC O 42:5 / PC 40:5   | unclassified | -0.0086 | 0.0027 | 1.54E-03 |
| 11q14.1 | DLG2  | rs17148090 | PC O 42:5 / PC 40:4   | unclassified | -0.0182 | 0.0076 | 1.68E-02 |
| 11q14.1 | DLG2  | rs17148090 | PC O 42:5 / PC 40:3   | unclassified | -0.0071 | 0.0179 | 6.93E-01 |
| 11q14.1 | DLG2  | rs17148090 | PC O 42:5 / PC 40:2   | unclassified | -0.0368 | 0.0234 | 1.16E-01 |
| 11q14.1 | DLG2  | rs17148090 | PC O 42:5 / PC 40:1   | unclassified | -0.0033 | 0.0139 | 8.15E-01 |
| 11q14.1 | DLG2  | rs17148090 | PC O 42:5 / PC 40:0   | unclassified | -0.0551 | 0.0260 | 3.42E-02 |
| 11q14.1 | DLG2  | rs17148090 | PC O 42:5 / PC 42:5   | unclassified | -0.0756 | 0.0324 | 1.97E-02 |
| 11q14.1 | DLG2  | rs17148090 | PC O 42:5 / PC 42:4   | unclassified | -0.1650 | 0.0775 | 3.33E-02 |
| 12q23.1 | CDK17 | rs12423247 | PC O 42:6 / PC 26:0   | unclassified | -0.6852 | 0.2049 | 8.25E-04 |
| 12q23.1 | CDK17 | rs12423247 | PC O 42:6 / PC 30:1   | unclassified | -0.1586 | 0.2003 | 4.28E-01 |
| 12q23.1 | CDK17 | rs12423247 | PC O 42:6 / PC 30:0   | unclassified | -0.0047 | 0.0121 | 6.96E-01 |
| 12q23.1 | CDK17 | rs12423247 | PC O 42:6 / PC O 32:1 | unclassified | -0.0409 | 0.0132 | 1.94E-03 |
| 12q23.1 | CDK17 | rs12423247 | PC O 42:6 / PC O 32:0 | unclassified | -0.0365 | 0.0100 | 2.65E-04 |
| 12q23.1 | CDK17 | rs12423247 | PC O 42:6 / PC 32:2   | unclassified | -0.0175 | 0.0131 | 1.82E-01 |
| 12q23.1 | CDK17 | rs12423247 | PC O 42:6 / PC 32:1   | unclassified | -0.0048 | 0.0035 | 1.68E-01 |
| 12q23.1 | CDK17 | rs12423247 | PC O 42:6 / PC 32:0   | unclassified | -0.0085 | 0.0022 | 1.42E-04 |
| 12q23.1 | CDK17 | rs12423247 | PC O 42:6 / PC O 34:3 | unclassified | -0.0218 | 0.0054 | 5.14E-05 |
| 12q23.1 | CDK17 | rs12423247 | PC O 42:6 / PC O 34:2 | unclassified | -0.0131 | 0.0030 | 1.69E-05 |
| 12q23.1 | CDK17 | rs12423247 | PC O 42:6 / PC O 34:1 | unclassified | -0.0120 | 0.0034 | 4.52E-04 |
| 12q23.1 | CDK17 | rs12423247 | PC O 42:6 / PC O 34:0 | unclassified | -0.0126 | 0.0248 | 6.11E-01 |
| 12q23.1 | CDK17 | rs12423247 | PC O 42:6 / PC 34:4   | unclassified | -0.0348 | 0.0343 | 3.10E-01 |
| 12q23.1 | CDK17 | rs12423247 | PC O 42:6 / PC 34:3   | unclassified | -0.0092 | 0.0027 | 5.21E-04 |
| 12q23.1 | CDK17 | rs12423247 | PC O 42:6 / PC 34:2   | unclassified | -0.0004 | 0.0001 | 2.25E-07 |
| 12q23.1 | CDK17 | rs12423247 | PC O 42:6 / PC 34:1   | unclassified | -0.0006 | 0.0002 | 9.21E-04 |
| 12q23.1 | CDK17 | rs12423247 | PC O 42:6 / PC 34:0   | unclassified | -0.0164 | 0.0140 | 2.41E-01 |
| 12q23.1 | CDK17 | rs12423247 | PC O 42:6 / PC O 36:5 | unclassified | -0.0099 | 0.0032 | 1.86E-03 |

|         |        |            |                       |              |          |         |          |
|---------|--------|------------|-----------------------|--------------|----------|---------|----------|
| 12q23.1 | CDK17  | rs12423247 | PC O 42:6 / PC O 36:4 | unclassified | -0.0094  | 0.0021  | 6.21E-06 |
| 12q23.1 | CDK17  | rs12423247 | PC O 42:6 / PC O 36:3 | unclassified | -0.0196  | 0.0046  | 1.79E-05 |
| 12q23.1 | CDK17  | rs12423247 | PC O 42:6 / PC O 36:2 | unclassified | -0.0096  | 0.0025  | 9.76E-05 |
| 12q23.1 | CDK17  | rs12423247 | PC O 42:6 / PC O 36:1 | unclassified | -0.0097  | 0.0040  | 1.45E-02 |
| 12q23.1 | CDK17  | rs12423247 | PC O 42:6 / PC O 36:0 | unclassified | -0.0011  | 0.0692  | 9.87E-01 |
| 12q23.1 | CDK17  | rs12423247 | PC O 42:6 / PC 36:5   | unclassified | -0.0014  | 0.0020  | 5.01E-01 |
| 12q23.1 | CDK17  | rs12423247 | PC O 42:6 / PC 36:4   | unclassified | -0.0008  | 0.0002  | 1.53E-04 |
| 12q23.1 | CDK17  | rs12423247 | PC O 42:6 / PC 36:3   | unclassified | -0.0012  | 0.0003  | 1.15E-05 |
| 12q23.1 | CDK17  | rs12423247 | PC O 42:6 / PC 36:2   | unclassified | -0.0007  | 0.0001  | 8.36E-08 |
| 12q23.1 | CDK17  | rs12423247 | PC O 42:6 / PC 36:1   | unclassified | -0.0035  | 0.0010  | 2.19E-04 |
| 12q23.1 | CDK17  | rs12423247 | PC O 42:6 / PC 36:0   | unclassified | -0.0205  | 0.0187  | 2.73E-01 |
| 12q23.1 | CDK17  | rs12423247 | PC O 42:6 / PC O 38:5 | unclassified | -0.0081  | 0.0018  | 9.80E-06 |
| 12q23.1 | CDK17  | rs12423247 | PC O 42:6 / PC O 38:4 | unclassified | -0.0096  | 0.0026  | 2.38E-04 |
| 12q23.1 | CDK17  | rs12423247 | PC O 42:6 / PC O 38:3 | unclassified | -0.0210  | 0.0083  | 1.11E-02 |
| 12q23.1 | CDK17  | rs12423247 | PC O 42:6 / PC O 38:2 | unclassified | -0.0988  | 0.0511  | 5.30E-02 |
| 12q23.1 | CDK17  | rs12423247 | PC O 42:6 / PC O 38:1 | unclassified | 0.0082   | 0.1663  | 9.61E-01 |
| 12q23.1 | CDK17  | rs12423247 | PC O 42:6 / PC 38:7   | unclassified | -0.0084  | 0.0174  | 6.28E-01 |
| 12q23.1 | CDK17  | rs12423247 | PC O 42:6 / PC 38:6   | unclassified | -0.0006  | 0.0004  | 1.33E-01 |
| 12q23.1 | CDK17  | rs12423247 | PC O 42:6 / PC 38:5   | unclassified | -0.0016  | 0.0006  | 7.92E-03 |
| 12q23.1 | CDK17  | rs12423247 | PC O 42:6 / PC 38:4   | unclassified | -0.0010  | 0.0003  | 2.40E-03 |
| 12q23.1 | CDK17  | rs12423247 | PC O 42:6 / PC 38:3   | unclassified | -0.0023  | 0.0010  | 2.50E-02 |
| 12q23.1 | CDK17  | rs12423247 | PC O 42:6 / PC 38:2   | unclassified | -0.0088  | 0.0241  | 7.15E-01 |
| 12q23.1 | CDK17  | rs12423247 | PC O 42:6 / PC 38:1   | unclassified | -0.0034  | 0.0084  | 6.88E-01 |
| 12q23.1 | CDK17  | rs12423247 | PC O 42:6 / PC 38:0   | unclassified | -0.0099  | 0.0066  | 1.32E-01 |
| 12q23.1 | CDK17  | rs12423247 | PC O 42:6 / PC O 40:6 | unclassified | -0.0094  | 0.0068  | 1.72E-01 |
| 12q23.1 | CDK17  | rs12423247 | PC O 42:6 / PC O 40:5 | unclassified | -0.0248  | 0.0090  | 5.52E-03 |
| 12q23.1 | CDK17  | rs12423247 | PC O 42:6 / PC O 40:4 | unclassified | -0.0502  | 0.0144  | 5.14E-04 |
| 12q23.1 | CDK17  | rs12423247 | PC O 42:6 / PC 40:7   | unclassified | -0.0121  | 0.0053  | 2.18E-02 |
| 12q23.1 | CDK17  | rs12423247 | PC O 42:6 / PC 40:6   | unclassified | -0.0013  | 0.0014  | 3.61E-01 |
| 12q23.1 | CDK17  | rs12423247 | PC O 42:6 / PC 40:5   | unclassified | -0.0084  | 0.0037  | 2.44E-02 |
| 12q23.1 | CDK17  | rs12423247 | PC O 42:6 / PC 40:4   | unclassified | -0.0275  | 0.0106  | 9.46E-03 |
| 12q23.1 | CDK17  | rs12423247 | PC O 42:6 / PC 40:3   | unclassified | -0.0151  | 0.0231  | 5.14E-01 |
| 12q23.1 | CDK17  | rs12423247 | PC O 42:6 / PC 40:2   | unclassified | -0.0275  | 0.0318  | 3.87E-01 |
| 12q23.1 | CDK17  | rs12423247 | PC O 42:6 / PC 40:1   | unclassified | -0.0318  | 0.0190  | 9.38E-02 |
| 12q23.1 | CDK17  | rs12423247 | PC O 42:6 / PC 40:0   | unclassified | -0.1161  | 0.0391  | 2.98E-03 |
| 12q23.1 | CDK17  | rs12423247 | PC O 42:6 / PC O 42:5 | unclassified | -0.0747  | 0.0237  | 1.67E-03 |
| 12q23.1 | CDK17  | rs12423247 | PC O 42:6 / PC 42:5   | unclassified | 0.0051   | 0.0436  | 9.07E-01 |
| 12q23.1 | CDK17  | rs12423247 | PC O 42:6 / PC 42:4   | unclassified | 0.0901   | 0.1024  | 3.79E-01 |
| 13q21.2 | PCDH20 | rs7337573  | PC 32:1 / PC 30:1     | elongation   | -16.2242 | 60.0870 | 7.87E-01 |
| 13q21.2 | PCDH20 | rs7337573  | PC 32:1 / PC 34:1     | elongation   | -0.0759  | 0.0246  | 2.05E-03 |
| 13q21.2 | PCDH20 | rs7337573  | PC 32:1 / PC 36:1     | elongation   | -0.6500  | 0.1840  | 4.12E-04 |

|         |        |           |                     |              |          |         |          |
|---------|--------|-----------|---------------------|--------------|----------|---------|----------|
| 13q21.2 | PCDH20 | rs7337573 | PC 32:1 / PC 38:1   | elongation   | -4.3126  | 4.5079  | 3.39E-01 |
| 13q21.2 | PCDH20 | rs7337573 | PC 32:1 / PC 40:1   | elongation   | -19.5434 | 6.3659  | 2.14E-03 |
| 13q21.2 | PCDH20 | rs7337573 | PC 32:1 / PC O 32:1 | oxidation    | -22.7312 | 4.4887  | 4.10E-07 |
| 13q21.2 | PCDH20 | rs7337573 | PC 32:1 / PC 32:0   | saturation   | -2.6546  | 0.5109  | 2.04E-07 |
| 13q21.2 | PCDH20 | rs7337573 | PC 32:1 / PC 26:0   | unclassified | -50.6455 | 30.3818 | 9.55E-02 |
| 13q21.2 | PCDH20 | rs7337573 | PC 32:1 / PC 30:0   | unclassified | -8.7083  | 3.7446  | 2.00E-02 |
| 13q21.2 | PCDH20 | rs7337573 | PC 32:1 / PC O 34:3 | unclassified | -9.1861  | 1.9206  | 1.73E-06 |
| 13q21.2 | PCDH20 | rs7337573 | PC 32:1 / PC 34:4   | unclassified | -13.8075 | 5.3763  | 1.02E-02 |
| 13q21.2 | PCDH20 | rs7337573 | PC 32:1 / PC 34:3   | unclassified | -1.8894  | 0.4304  | 1.13E-05 |
| 13q21.2 | PCDH20 | rs7337573 | PC 32:1 / PC 34:0   | unclassified | -70.41   | 19.35   | 2.75E-04 |
| 13q21.2 | PCDH20 | rs7337573 | PC 32:1 / PC O 36:5 | unclassified | -3.6737  | 1.0464  | 4.47E-04 |
| 13q21.2 | PCDH20 | rs7337573 | PC 32:1 / PC O 36:4 | unclassified | -3.1230  | 0.6567  | 1.98E-06 |
| 13q21.2 | PCDH20 | rs7337573 | PC 32:1 / PC O 36:0 | unclassified | -18.15   | 16.29   | 2.65E-01 |
| 13q21.2 | PCDH20 | rs7337573 | PC 32:1 / PC 36:5   | unclassified | -1.2139  | 0.4212  | 3.95E-03 |
| 13q21.2 | PCDH20 | rs7337573 | PC 32:1 / PC 36:4   | unclassified | -0.1750  | 0.0434  | 5.59E-05 |
| 13q21.2 | PCDH20 | rs7337573 | PC 32:1 / PC 36:0   | unclassified | -13.40   | 9.93    | 1.77E-01 |
| 13q21.2 | PCDH20 | rs7337573 | PC 32:1 / PC O 38:5 | unclassified | -2.95    | 0.67    | 1.08E-05 |
| 13q21.2 | PCDH20 | rs7337573 | PC 32:1 / PC O 38:3 | unclassified | -15.06   | 2.80    | 7.90E-08 |
| 13q21.2 | PCDH20 | rs7337573 | PC 32:1 / PC O 38:2 | unclassified | -39.42   | 11.98   | 1.01E-03 |
| 13q21.2 | PCDH20 | rs7337573 | PC 32:1 / PC O 38:1 | unclassified | -132.48  | 36.23   | 2.56E-04 |
| 13q21.2 | PCDH20 | rs7337573 | PC 32:1 / PC 38:7   | unclassified | -11.8776 | 5.6460  | 3.54E-02 |
| 13q21.2 | PCDH20 | rs7337573 | PC 32:1 / PC 38:6   | unclassified | -0.3908  | 0.1156  | 7.22E-04 |
| 13q21.2 | PCDH20 | rs7337573 | PC 32:1 / PC 38:5   | unclassified | -0.5695  | 0.1464  | 1.00E-04 |
| 13q21.2 | PCDH20 | rs7337573 | PC 32:1 / PC 38:4   | unclassified | -0.2848  | 0.0816  | 4.85E-04 |
| 13q21.2 | PCDH20 | rs7337573 | PC 32:1 / PC 38:3   | unclassified | -0.8829  | 0.1997  | 9.87E-06 |
| 13q21.2 | PCDH20 | rs7337573 | PC 32:1 / PC 38:2   | unclassified | -11.8647 | 6.7355  | 7.82E-02 |
| 13q21.2 | PCDH20 | rs7337573 | PC 32:1 / PC 38:0   | unclassified | -6.5739  | 2.0357  | 1.24E-03 |
| 13q21.2 | PCDH20 | rs7337573 | PC 32:1 / PC O 40:5 | unclassified | -18.2214 | 3.7250  | 1.00E-06 |
| 13q21.2 | PCDH20 | rs7337573 | PC 32:1 / PC 40:7   | unclassified | -6.8560  | 1.5539  | 1.02E-05 |
| 13q21.2 | PCDH20 | rs7337573 | PC 32:1 / PC 40:6   | unclassified | -0.9649  | 0.3405  | 4.61E-03 |
| 13q21.2 | PCDH20 | rs7337573 | PC 32:1 / PC 40:5   | unclassified | -2.7408  | 0.8555  | 1.36E-03 |
| 13q21.2 | PCDH20 | rs7337573 | PC 32:1 / PC 40:4   | unclassified | -5.1475  | 2.2526  | 2.23E-02 |
| 13q21.2 | PCDH20 | rs7337573 | PC 32:1 / PC 40:3   | unclassified | -15.1946 | 6.6836  | 2.30E-02 |
| 13q21.2 | PCDH20 | rs7337573 | PC 32:1 / PC 40:2   | unclassified | -38.7784 | 8.6624  | 7.58E-06 |
| 13q21.2 | PCDH20 | rs7337573 | PC 32:1 / PC 40:0   | unclassified | -20.2498 | 9.2188  | 2.81E-02 |
| 13q21.2 | PCDH20 | rs7337573 | PC 32:1 / PC O 42:6 | unclassified | -41.5929 | 13.4535 | 1.99E-03 |
| 13q21.2 | PCDH20 | rs7337573 | PC 32:1 / PC O 42:5 | unclassified | -39.4633 | 9.8226  | 5.88E-05 |
| 13q21.2 | PCDH20 | rs7337573 | PC 32:1 / PC 42:5   | unclassified | -35.9763 | 11.0778 | 1.16E-03 |
| 13q21.2 | PCDH20 | rs7337573 | PC 32:1 / PC 42:4   | unclassified | -33.3531 | 22.4458 | 1.37E-01 |
| 13q21.2 | PCDH20 | rs7337573 | PC 32:1 / PC 32:2   | saturation   | -16.7985 | 2.5499  | 4.46E-11 |
| 13q21.2 | PCDH20 | rs7337573 | PC 32:1 / PC O 32:0 | unclassified | -28.7017 | 3.2735  | 1.82E-18 |

|         |        |            |                       |              |          |        |          |
|---------|--------|------------|-----------------------|--------------|----------|--------|----------|
| 13q21.2 | PCDH20 | rs7337573  | PC 32:1 / PC O 34:2   | unclassified | -9.2892  | 1.1192 | 1.04E-16 |
| 13q21.2 | PCDH20 | rs7337573  | PC 32:1 / PC O 34:1   | unclassified | -6.5824  | 1.0022 | 5.11E-11 |
| 13q21.2 | PCDH20 | rs7337573  | PC 32:1 / PC O 34:0   | unclassified | -56.3320 | 9.6174 | 4.70E-09 |
| 13q21.2 | PCDH20 | rs7337573  | PC 32:1 / PC 34:2     | unclassified | -0.1211  | 0.0187 | 9.57E-11 |
| 13q21.2 | PCDH20 | rs7337573  | PC 32:1 / PC O 36:3   | unclassified | -8.8210  | 1.5119 | 5.40E-09 |
| 13q21.2 | PCDH20 | rs7337573  | PC 32:1 / PC O 36:2   | unclassified | -7.7711  | 0.9565 | 4.50E-16 |
| 13q21.2 | PCDH20 | rs7337573  | PC 32:1 / PC O 36:1   | unclassified | -7.8715  | 1.2481 | 2.85E-10 |
| 13q21.2 | PCDH20 | rs7337573  | PC 32:1 / PC 36:3     | unclassified | -0.3715  | 0.0583 | 1.82E-10 |
| 13q21.2 | PCDH20 | rs7337573  | PC 32:1 / PC 36:2     | unclassified | -0.2217  | 0.0377 | 4.00E-09 |
| 13q21.2 | PCDH20 | rs7337573  | PC 32:1 / PC O 38:4   | unclassified | -6.2303  | 0.9935 | 3.59E-10 |
| 13q21.2 | PCDH20 | rs7337573  | PC 32:1 / PC O 40:6   | unclassified | -19.3170 | 2.8979 | 2.63E-11 |
| 13q21.2 | PCDH20 | rs7337573  | PC 32:1 / PC O 40:4   | unclassified | -30.6446 | 5.3823 | 1.24E-08 |
| 13q22.1 | KLF12  | rs17718828 | PC O 42:5 / PC 26:0   | unclassified | 0.0715   | 0.1325 | 5.89E-01 |
| 13q22.1 | KLF12  | rs17718828 | PC O 42:5 / PC 30:1   | unclassified | 0.0619   | 0.1195 | 6.04E-01 |
| 13q22.1 | KLF12  | rs17718828 | PC O 42:5 / PC 30:0   | unclassified | 0.0240   | 0.0069 | 5.40E-04 |
| 13q22.1 | KLF12  | rs17718828 | PC O 42:5 / PC O 32:1 | unclassified | 0.0227   | 0.0076 | 2.63E-03 |
| 13q22.1 | KLF12  | rs17718828 | PC O 42:5 / PC O 32:0 | unclassified | 0.0212   | 0.0055 | 1.26E-04 |
| 13q22.1 | KLF12  | rs17718828 | PC O 42:5 / PC 32:2   | unclassified | 0.0174   | 0.0076 | 2.26E-02 |
| 13q22.1 | KLF12  | rs17718828 | PC O 42:5 / PC 32:1   | unclassified | 0.0055   | 0.0020 | 6.33E-03 |
| 13q22.1 | KLF12  | rs17718828 | PC O 42:5 / PC 32:0   | unclassified | 0.0063   | 0.0013 | 6.75E-07 |
| 13q22.1 | KLF12  | rs17718828 | PC O 42:5 / PC O 34:3 | unclassified | 0.0046   | 0.0032 | 1.48E-01 |
| 13q22.1 | KLF12  | rs17718828 | PC O 42:5 / PC O 34:2 | unclassified | 0.0053   | 0.0018 | 2.68E-03 |
| 13q22.1 | KLF12  | rs17718828 | PC O 42:5 / PC O 34:1 | unclassified | 0.0076   | 0.0018 | 3.46E-05 |
| 13q22.1 | KLF12  | rs17718828 | PC O 42:5 / PC O 34:0 | unclassified | 0.0519   | 0.0147 | 4.32E-04 |
| 13q22.1 | KLF12  | rs17718828 | PC O 42:5 / PC 34:4   | unclassified | 0.0490   | 0.0199 | 1.40E-02 |
| 13q22.1 | KLF12  | rs17718828 | PC O 42:5 / PC 34:3   | unclassified | 0.0044   | 0.0016 | 5.16E-03 |
| 13q22.1 | KLF12  | rs17718828 | PC O 42:5 / PC 34:2   | unclassified | 0.0002   | 0.0000 | 5.42E-05 |
| 13q22.1 | KLF12  | rs17718828 | PC O 42:5 / PC 34:1   | unclassified | 0.0004   | 0.0001 | 1.71E-04 |
| 13q22.1 | KLF12  | rs17718828 | PC O 42:5 / PC 34:0   | unclassified | 0.0156   | 0.0087 | 7.19E-02 |
| 13q22.1 | KLF12  | rs17718828 | PC O 42:5 / PC O 36:5 | unclassified | 0.0054   | 0.0019 | 5.11E-03 |
| 13q22.1 | KLF12  | rs17718828 | PC O 42:5 / PC O 36:4 | unclassified | 0.0043   | 0.0012 | 2.30E-04 |
| 13q22.1 | KLF12  | rs17718828 | PC O 42:5 / PC O 36:3 | unclassified | 0.0078   | 0.0026 | 3.03E-03 |
| 13q22.1 | KLF12  | rs17718828 | PC O 42:5 / PC O 36:2 | unclassified | 0.0049   | 0.0014 | 5.86E-04 |
| 13q22.1 | KLF12  | rs17718828 | PC O 42:5 / PC O 36:1 | unclassified | 0.0089   | 0.0022 | 5.77E-05 |
| 13q22.1 | KLF12  | rs17718828 | PC O 42:5 / PC O 36:0 | unclassified | 0.1032   | 0.0425 | 1.52E-02 |
| 13q22.1 | KLF12  | rs17718828 | PC O 42:5 / PC 36:5   | unclassified | 0.0051   | 0.0014 | 2.33E-04 |
| 13q22.1 | KLF12  | rs17718828 | PC O 42:5 / PC 36:4   | unclassified | 0.0005   | 0.0001 | 1.00E-05 |
| 13q22.1 | KLF12  | rs17718828 | PC O 42:5 / PC 36:3   | unclassified | 0.0005   | 0.0002 | 3.94E-04 |
| 13q22.1 | KLF12  | rs17718828 | PC O 42:5 / PC 36:2   | unclassified | 0.0003   | 0.0001 | 9.77E-04 |
| 13q22.1 | KLF12  | rs17718828 | PC O 42:5 / PC 36:1   | unclassified | 0.0017   | 0.0006 | 2.29E-03 |
| 13q22.1 | KLF12  | rs17718828 | PC O 42:5 / PC 36:0   | unclassified | 0.0140   | 0.0111 | 2.06E-01 |



|          |        |            |                       |              |         |        |          |
|----------|--------|------------|-----------------------|--------------|---------|--------|----------|
| 13q22.1  | KLF12  | rs17718828 | PC O 42:5 / PC O 38:5 | unclassified | 0.0040  | 0.0011 | 1.92E-04 |
| 13q22.1  | KLF12  | rs17718828 | PC O 42:5 / PC O 38:4 | unclassified | 0.0059  | 0.0014 | 2.73E-05 |
| 13q22.1  | KLF12  | rs17718828 | PC O 42:5 / PC O 38:3 | unclassified | 0.0172  | 0.0045 | 1.21E-04 |
| 13q22.1  | KLF12  | rs17718828 | PC O 42:5 / PC O 38:2 | unclassified | 0.0007  | 0.0300 | 9.80E-01 |
| 13q22.1  | KLF12  | rs17718828 | PC O 42:5 / PC O 38:1 | unclassified | 0.0220  | 0.0962 | 8.19E-01 |
| 13q22.1  | KLF12  | rs17718828 | PC O 42:5 / PC 38:7   | unclassified | 0.0406  | 0.0117 | 5.05E-04 |
| 13q22.1  | KLF12  | rs17718828 | PC O 42:5 / PC 38:6   | unclassified | 0.0013  | 0.0003 | 2.20E-06 |
| 13q22.1  | KLF12  | rs17718828 | PC O 42:5 / PC 38:5   | unclassified | 0.0014  | 0.0004 | 5.78E-05 |
| 13q22.1  | KLF12  | rs17718828 | PC O 42:5 / PC 38:4   | unclassified | 0.0008  | 0.0002 | 5.80E-05 |
| 13q22.1  | KLF12  | rs17718828 | PC O 42:5 / PC 38:3   | unclassified | 0.0021  | 0.0006 | 3.69E-04 |
| 13q22.1  | KLF12  | rs17718828 | PC O 42:5 / PC 38:2   | unclassified | 0.0440  | 0.0164 | 7.26E-03 |
| 13q22.1  | KLF12  | rs17718828 | PC O 42:5 / PC 38:1   | unclassified | 0.0126  | 0.0049 | 1.01E-02 |
| 13q22.1  | KLF12  | rs17718828 | PC O 42:5 / PC 38:0   | unclassified | 0.0150  | 0.0042 | 3.83E-04 |
| 13q22.1  | KLF12  | rs17718828 | PC O 42:5 / PC O 40:6 | unclassified | 0.0169  | 0.0044 | 1.24E-04 |
| 13q22.1  | KLF12  | rs17718828 | PC O 42:5 / PC O 40:5 | unclassified | 0.0180  | 0.0049 | 2.03E-04 |
| 13q22.1  | KLF12  | rs17718828 | PC O 42:5 / PC O 40:4 | unclassified | 0.0252  | 0.0074 | 6.77E-04 |
| 13q22.1  | KLF12  | rs17718828 | PC O 42:5 / PC 40:7   | unclassified | 0.0116  | 0.0034 | 5.33E-04 |
| 13q22.1  | KLF12  | rs17718828 | PC O 42:5 / PC 40:6   | unclassified | 0.0041  | 0.0009 | 6.15E-06 |
| 13q22.1  | KLF12  | rs17718828 | PC O 42:5 / PC 40:5   | unclassified | 0.0096  | 0.0023 | 2.44E-05 |
| 13q22.1  | KLF12  | rs17718828 | PC O 42:5 / PC 40:4   | unclassified | 0.0183  | 0.0062 | 3.30E-03 |
| 13q22.1  | KLF12  | rs17718828 | PC O 42:5 / PC 40:3   | unclassified | 0.0290  | 0.0139 | 3.64E-02 |
| 13q22.1  | KLF12  | rs17718828 | PC O 42:5 / PC 40:2   | unclassified | 0.0623  | 0.0180 | 5.27E-04 |
| 13q22.1  | KLF12  | rs17718828 | PC O 42:5 / PC 40:1   | unclassified | 0.0205  | 0.0104 | 4.94E-02 |
| 13q22.1  | KLF12  | rs17718828 | PC O 42:5 / PC 40:0   | unclassified | 0.0500  | 0.0216 | 2.05E-02 |
| 13q22.1  | KLF12  | rs17718828 | PC O 42:5 / PC O 42:6 | unclassified | 0.0252  | 0.0191 | 1.88E-01 |
| 13q22.1  | KLF12  | rs17718828 | PC O 42:5 / PC 42:5   | unclassified | 0.0778  | 0.0278 | 5.17E-03 |
| 13q22.1  | KLF12  | rs17718828 | PC O 42:5 / PC 42:4   | unclassified | 0.1209  | 0.0641 | 5.93E-02 |
| 16p13.11 | PDXDC1 | rs4500751  | LPC 20:3 / LPC 18:3   | elongation   | -0.1953 | 0.0345 | 1.44E-08 |
| 16p13.11 | PDXDC1 | rs4500751  | PC 34:2 / PC 32:2     | elongation   | -0.7693 | 1.1987 | 5.21E-01 |
| 16p13.11 | PDXDC1 | rs4500751  | PC 34:2 / PC 36:2     | elongation   | 0.0124  | 0.0065 | 5.52E-02 |
| 16p13.11 | PDXDC1 | rs4500751  | PC 34:2 / PC 38:2     | elongation   | -2.6762 | 2.9079 | 3.57E-01 |
| 16p13.11 | PDXDC1 | rs4500751  | PC 34:2 / PC 40:2     | elongation   | 7.6720  | 3.8020 | 4.36E-02 |
| 16p13.11 | PDXDC1 | rs4500751  | PC 36:3 / PC 34:3     | elongation   | -0.2870 | 0.0400 | 7.40E-13 |
| 16p13.11 | PDXDC1 | rs4500751  | PC 36:3 / PC 38:3     | elongation   | 0.0965  | 0.0183 | 1.26E-07 |
| 16p13.11 | PDXDC1 | rs4500751  | PC 36:3 / PC 40:3     | elongation   | -0.6588 | 0.8305 | 4.28E-01 |
| 16p13.11 | PDXDC1 | rs4500751  | PC 38:3 / PC 34:3     | elongation   | -0.1746 | 0.0206 | 2.39E-17 |
| 16p13.11 | PDXDC1 | rs4500751  | PC 38:3 / PC 36:3     | elongation   | -0.0095 | 0.0016 | 6.63E-09 |
| 16p13.11 | PDXDC1 | rs4500751  | PC 38:3 / PC 40:3     | elongation   | -0.6666 | 0.2744 | 1.51E-02 |
| 16p13.11 | PDXDC1 | rs4500751  | PE 38:3 / PE 34:3     | elongation   | -0.0977 | 0.0148 | 3.83E-11 |
| 16p13.11 | PDXDC1 | rs4500751  | PE 38:3 / PE 36:3     | elongation   | -0.0223 | 0.0029 | 2.86E-14 |
| 16p13.11 | PDXDC1 | rs4500751  | PE 38:3 / PE 40:3     | elongation   | -0.5886 | 0.2297 | 1.04E-02 |

|          |        |           |                     |              |          |          |          |
|----------|--------|-----------|---------------------|--------------|----------|----------|----------|
| 16p13.11 | PDXDC1 | rs4500751 | LPC 20:3 / LPC 18:3 | elongation   | -1.9E-01 | 3.5E-02  | 1.44E-08 |
| 16p13.11 | PDXDC1 | rs4500751 | PC 36:3 / PC O 36:3 | oxidation    | -0.4933  | 0.1147   | 1.70E-05 |
| 16p13.11 | PDXDC1 | rs4500751 | LPC 20:3 / LPC 20:5 | saturation   | -0.1309  | 0.0338   | 1.08E-04 |
| 16p13.11 | PDXDC1 | rs4500751 | LPC 20:3 / LPC 20:4 | saturation   | -0.0121  | 0.0024   | 4.55E-07 |
| 16p13.11 | PDXDC1 | rs4500751 | LPC 20:3 / LPC 20:0 | saturation   | -0.4076  | 0.0642   | 2.11E-10 |
| 16p13.11 | PDXDC1 | rs4500751 | PC 34:2 / PC 34:4   | saturation   | 4.2067   | 3.4559   | 2.24E-01 |
| 16p13.11 | PDXDC1 | rs4500751 | PC 34:2 / PC 34:3   | saturation   | 0.1812   | 0.1595   | 2.56E-01 |
| 16p13.11 | PDXDC1 | rs4500751 | PC 34:2 / PC 34:1   | saturation   | 0.0518   | 0.0124   | 3.12E-05 |
| 16p13.11 | PDXDC1 | rs4500751 | PC 34:2 / PC 34:0   | saturation   | 2.6534   | 2.1982   | 2.27E-01 |
| 16p13.11 | PDXDC1 | rs4500751 | PC 36:3 / PC 36:5   | saturation   | -0.0894  | 0.0667   | 1.80E-01 |
| 16p13.11 | PDXDC1 | rs4500751 | PC 36:3 / PC 36:4   | saturation   | -0.0051  | 0.0042   | 2.24E-01 |
| 16p13.11 | PDXDC1 | rs4500751 | PC 36:3 / PC 36:2   | saturation   | -0.0183  | 0.0024   | 1.62E-14 |
| 16p13.11 | PDXDC1 | rs4500751 | PC 36:3 / PC 36:1   | saturation   | -0.0527  | 0.0203   | 9.30E-03 |
| 16p13.11 | PDXDC1 | rs4500751 | PC 38:3 / PC 38:7   | saturation   | -0.9658  | 0.2282   | 2.32E-05 |
| 16p13.11 | PDXDC1 | rs4500751 | PC 38:3 / PC 38:6   | saturation   | -0.0205  | 0.0048   | 1.90E-05 |
| 16p13.11 | PDXDC1 | rs4500751 | PC 38:3 / PC 38:5   | saturation   | -0.0325  | 0.0053   | 8.95E-10 |
| 16p13.11 | PDXDC1 | rs4500751 | PC 38:3 / PC 38:4   | saturation   | -0.0113  | 0.0025   | 4.45E-06 |
| 16p13.11 | PDXDC1 | rs4500751 | PC 38:3 / PC 38:2   | saturation   | -0.7037  | 0.2577   | 6.33E-03 |
| 16p13.11 | PDXDC1 | rs4500751 | PC 38:3 / PC 38:1   | saturation   | -0.3847  | 0.1168   | 9.90E-04 |
| 16p13.11 | PDXDC1 | rs4500751 | PC 38:3 / PC 38:0   | saturation   | -0.3273  | 0.0842   | 1.02E-04 |
| 16p13.11 | PDXDC1 | rs4500751 | LPC 20:3 / LPC 20:4 | saturation   | -1.2E-02 | 2.40E-03 | 4.55E-07 |
| 16p13.11 | PDXDC1 | rs4500751 | LPC 20:3 / LPC 20:0 | saturation   | -4.1E-01 | 6.42E-02 | 2.11E-10 |
| 16p13.11 | PDXDC1 | rs4500751 | LPC 20:3 / LPC 15:0 | unclassified | -0.0987  | 0.0155   | 2.03E-10 |
| 16p13.11 | PDXDC1 | rs4500751 | LPC 20:3 / LPC 16:0 | unclassified | -0.0009  | 0.0001   | 5.78E-17 |
| 16p13.11 | PDXDC1 | rs4500751 | LPC 20:3 / LPC 18:2 | unclassified | -0.0059  | 0.0007   | 2.22E-18 |
| 16p13.11 | PDXDC1 | rs4500751 | LPC 20:3 / LPC 18:1 | unclassified | -0.0059  | 0.0007   | 5.95E-16 |
| 16p13.11 | PDXDC1 | rs4500751 | LPC 20:3 / LPC 18:0 | unclassified | -0.0026  | 0.0004   | 4.17E-13 |
| 16p13.11 | PDXDC1 | rs4500751 | LPC 20:3 / LPC 22:6 | unclassified | -0.0575  | 0.0131   | 1.14E-05 |
| 16p13.11 | PDXDC1 | rs4500751 | LPC 20:3 / LPC 22:5 | unclassified | -0.1815  | 0.0306   | 3.19E-09 |
| 16p13.11 | PDXDC1 | rs4500751 | LPC 20:3 / LPC 22:4 | unclassified | -0.2912  | 0.0739   | 8.08E-05 |
| 16p13.11 | PDXDC1 | rs4500751 | LPC 20:3 / LPC 22:0 | unclassified | -0.1880  | 0.0375   | 5.24E-07 |
| 16p13.11 | PDXDC1 | rs4500751 | PC 34:2 / PC 26:0   | unclassified | -14.0170 | 21.0477  | 5.05E-01 |
| 16p13.11 | PDXDC1 | rs4500751 | PC 34:2 / PC 30:1   | unclassified | -21.8421 | 26.5008  | 4.10E-01 |
| 16p13.11 | PDXDC1 | rs4500751 | PC 34:2 / PC 30:0   | unclassified | 2.8389   | 1.2387   | 2.19E-02 |
| 16p13.11 | PDXDC1 | rs4500751 | PC 34:2 / PC O 32:1 | unclassified | 4.2301   | 1.5463   | 6.23E-03 |
| 16p13.11 | PDXDC1 | rs4500751 | PC 34:2 / PC O 32:0 | unclassified | 2.3136   | 1.0041   | 2.12E-02 |
| 16p13.11 | PDXDC1 | rs4500751 | PC 34:2 / PC 32:1   | unclassified | 0.6633   | 0.3301   | 4.45E-02 |
| 16p13.11 | PDXDC1 | rs4500751 | PC 34:2 / PC 32:0   | unclassified | 0.8089   | 0.1579   | 3.00E-07 |
| 16p13.11 | PDXDC1 | rs4500751 | PC 34:2 / PC O 34:3 | unclassified | 0.1537   | 0.5423   | 7.77E-01 |
| 16p13.11 | PDXDC1 | rs4500751 | PC 34:2 / PC O 34:2 | unclassified | 0.1039   | 0.2465   | 6.73E-01 |
| 16p13.11 | PDXDC1 | rs4500751 | PC 34:2 / PC O 34:1 | unclassified | 0.9813   | 0.2901   | 7.17E-04 |

|          |        |           |                     |              |          |         |          |
|----------|--------|-----------|---------------------|--------------|----------|---------|----------|
| 16p13.11 | PDXDC1 | rs4500751 | PC 34:2 / PC O 34:0 | unclassified | 9.1318   | 2.8826  | 1.54E-03 |
| 16p13.11 | PDXDC1 | rs4500751 | PC 34:2 / PC O 36:5 | unclassified | 1.4076   | 0.3802  | 2.14E-04 |
| 16p13.11 | PDXDC1 | rs4500751 | PC 34:2 / PC O 36:4 | unclassified | 1.0067   | 0.2214  | 5.42E-06 |
| 16p13.11 | PDXDC1 | rs4500751 | PC 34:2 / PC O 36:3 | unclassified | 1.0796   | 0.3820  | 4.71E-03 |
| 16p13.11 | PDXDC1 | rs4500751 | PC 34:2 / PC O 36:2 | unclassified | 0.1740   | 0.1988  | 3.82E-01 |
| 16p13.11 | PDXDC1 | rs4500751 | PC 34:2 / PC O 36:1 | unclassified | 1.2118   | 0.3565  | 6.76E-04 |
| 16p13.11 | PDXDC1 | rs4500751 | PC 34:2 / PC O 36:0 | unclassified | 7.0610   | 9.8814  | 4.75E-01 |
| 16p13.11 | PDXDC1 | rs4500751 | PC 34:2 / PC 36:5   | unclassified | 0.4403   | 0.2547  | 8.39E-02 |
| 16p13.11 | PDXDC1 | rs4500751 | PC 34:2 / PC 36:4   | unclassified | 0.0835   | 0.0164  | 3.60E-07 |
| 16p13.11 | PDXDC1 | rs4500751 | PC 34:2 / PC 36:3   | unclassified | 0.1370   | 0.0139  | 6.84E-23 |
| 16p13.11 | PDXDC1 | rs4500751 | PC 34:2 / PC 36:1   | unclassified | 0.2488   | 0.0843  | 3.18E-03 |
| 16p13.11 | PDXDC1 | rs4500751 | PC 34:2 / PC 36:0   | unclassified | 4.5179   | 2.6380  | 8.68E-02 |
| 16p13.11 | PDXDC1 | rs4500751 | PC 34:2 / PC O 38:5 | unclassified | 1.1721   | 0.2212  | 1.17E-07 |
| 16p13.11 | PDXDC1 | rs4500751 | PC 34:2 / PC O 38:4 | unclassified | 1.6412   | 0.3051  | 7.51E-08 |
| 16p13.11 | PDXDC1 | rs4500751 | PC 34:2 / PC O 38:3 | unclassified | 5.9179   | 0.8440  | 2.35E-12 |
| 16p13.11 | PDXDC1 | rs4500751 | PC 34:2 / PC O 38:2 | unclassified | -5.7422  | 6.3371  | 3.65E-01 |
| 16p13.11 | PDXDC1 | rs4500751 | PC 34:2 / PC O 38:1 | unclassified | 2.0246   | 20.1514 | 9.20E-01 |
| 16p13.11 | PDXDC1 | rs4500751 | PC 34:2 / PC 38:7   | unclassified | 4.6061   | 2.2269  | 3.86E-02 |
| 16p13.11 | PDXDC1 | rs4500751 | PC 34:2 / PC 38:6   | unclassified | 0.1874   | 0.0460  | 4.56E-05 |
| 16p13.11 | PDXDC1 | rs4500751 | PC 34:2 / PC 38:5   | unclassified | 0.2461   | 0.0640  | 1.19E-04 |
| 16p13.11 | PDXDC1 | rs4500751 | PC 34:2 / PC 38:4   | unclassified | 0.1867   | 0.0352  | 1.15E-07 |
| 16p13.11 | PDXDC1 | rs4500751 | PC 34:2 / PC 38:3   | unclassified | 0.7619   | 0.0973  | 5.00E-15 |
| 16p13.11 | PDXDC1 | rs4500751 | PC 34:2 / PC 38:1   | unclassified | 0.1630   | 0.9832  | 8.68E-01 |
| 16p13.11 | PDXDC1 | rs4500751 | PC 34:2 / PC 38:0   | unclassified | 2.2936   | 0.8205  | 5.18E-03 |
| 16p13.11 | PDXDC1 | rs4500751 | PC 34:2 / PC O 40:6 | unclassified | 3.7555   | 0.9773  | 1.22E-04 |
| 16p13.11 | PDXDC1 | rs4500751 | PC 34:2 / PC O 40:5 | unclassified | 5.7987   | 1.3760  | 2.51E-05 |
| 16p13.11 | PDXDC1 | rs4500751 | PC 34:2 / PC O 40:4 | unclassified | 8.0582   | 2.0451  | 8.14E-05 |
| 16p13.11 | PDXDC1 | rs4500751 | PC 34:2 / PC 40:7   | unclassified | 1.7255   | 0.5905  | 3.48E-03 |
| 16p13.11 | PDXDC1 | rs4500751 | PC 34:2 / PC 40:6   | unclassified | 0.6465   | 0.1696  | 1.38E-04 |
| 16p13.11 | PDXDC1 | rs4500751 | PC 34:2 / PC 40:5   | unclassified | 1.2681   | 0.4241  | 2.79E-03 |
| 16p13.11 | PDXDC1 | rs4500751 | PC 34:2 / PC 40:4   | unclassified | 5.1794   | 1.2387  | 2.90E-05 |
| 16p13.11 | PDXDC1 | rs4500751 | PC 34:2 / PC 40:3   | unclassified | 5.2017   | 2.9994  | 8.29E-02 |
| 16p13.11 | PDXDC1 | rs4500751 | PC 34:2 / PC 40:1   | unclassified | -0.5837  | 2.1982  | 7.91E-01 |
| 16p13.11 | PDXDC1 | rs4500751 | PC 34:2 / PC 40:0   | unclassified | 13.8997  | 5.0887  | 6.30E-03 |
| 16p13.11 | PDXDC1 | rs4500751 | PC 34:2 / PC O 42:6 | unclassified | 13.1865  | 5.5928  | 1.84E-02 |
| 16p13.11 | PDXDC1 | rs4500751 | PC 34:2 / PC O 42:5 | unclassified | 13.1801  | 3.9710  | 9.03E-04 |
| 16p13.11 | PDXDC1 | rs4500751 | PC 34:2 / PC 42:5   | unclassified | 6.3255   | 6.1291  | 3.02E-01 |
| 16p13.11 | PDXDC1 | rs4500751 | PC 34:2 / PC 42:4   | unclassified | 22.9032  | 14.3418 | 1.10E-01 |
| 16p13.11 | PDXDC1 | rs4500751 | PC 36:3 / PC 26:0   | unclassified | -16.4598 | 5.9751  | 5.87E-03 |
| 16p13.11 | PDXDC1 | rs4500751 | PC 36:3 / PC 30:1   | unclassified | -14.9157 | 7.8391  | 5.71E-02 |
| 16p13.11 | PDXDC1 | rs4500751 | PC 36:3 / PC 30:0   | unclassified | -0.2856  | 0.3370  | 3.97E-01 |

|          |        |           |                     |              |         |        |          |
|----------|--------|-----------|---------------------|--------------|---------|--------|----------|
| 16p13.11 | PDXDC1 | rs4500751 | PC 36:3 / PC O 32:1 | unclassified | -1.1277 | 0.4720 | 1.69E-02 |
| 16p13.11 | PDXDC1 | rs4500751 | PC 36:3 / PC O 32:0 | unclassified | -0.9458 | 0.3059 | 1.99E-03 |
| 16p13.11 | PDXDC1 | rs4500751 | PC 36:3 / PC 32:2   | unclassified | -1.5244 | 0.3342 | 5.09E-06 |
| 16p13.11 | PDXDC1 | rs4500751 | PC 36:3 / PC 32:1   | unclassified | -0.1302 | 0.0821 | 1.13E-01 |
| 16p13.11 | PDXDC1 | rs4500751 | PC 36:3 / PC 32:0   | unclassified | -0.1261 | 0.0477 | 8.27E-03 |
| 16p13.11 | PDXDC1 | rs4500751 | PC 36:3 / PC O 34:3 | unclassified | -0.8686 | 0.1831 | 2.08E-06 |
| 16p13.11 | PDXDC1 | rs4500751 | PC 36:3 / PC O 34:2 | unclassified | -0.5229 | 0.0870 | 1.88E-09 |
| 16p13.11 | PDXDC1 | rs4500751 | PC 36:3 / PC O 34:1 | unclassified | -0.2865 | 0.0801 | 3.46E-04 |
| 16p13.11 | PDXDC1 | rs4500751 | PC 36:3 / PC O 34:0 | unclassified | -0.5842 | 0.8200 | 4.76E-01 |
| 16p13.11 | PDXDC1 | rs4500751 | PC 36:3 / PC 34:4   | unclassified | -1.8623 | 0.8609 | 3.05E-02 |
| 16p13.11 | PDXDC1 | rs4500751 | PC 36:3 / PC 34:1   | unclassified | -0.0083 | 0.0030 | 6.06E-03 |
| 16p13.11 | PDXDC1 | rs4500751 | PC 36:3 / PC 34:0   | unclassified | -0.2596 | 0.6452 | 6.87E-01 |
| 16p13.11 | PDXDC1 | rs4500751 | PC 36:3 / PC O 36:5 | unclassified | -0.1813 | 0.1111 | 1.03E-01 |
| 16p13.11 | PDXDC1 | rs4500751 | PC 36:3 / PC O 36:4 | unclassified | -0.0950 | 0.0633 | 1.33E-01 |
| 16p13.11 | PDXDC1 | rs4500751 | PC 36:3 / PC O 36:2 | unclassified | -0.3756 | 0.0678 | 3.01E-08 |
| 16p13.11 | PDXDC1 | rs4500751 | PC 36:3 / PC O 36:1 | unclassified | -0.2921 | 0.0956 | 2.26E-03 |
| 16p13.11 | PDXDC1 | rs4500751 | PC 36:3 / PC O 36:0 | unclassified | -4.4086 | 2.6992 | 1.02E-01 |
| 16p13.11 | PDXDC1 | rs4500751 | PC 36:3 / PC 36:0   | unclassified | -0.8497 | 0.8154 | 2.97E-01 |
| 16p13.11 | PDXDC1 | rs4500751 | PC 36:3 / PC O 38:5 | unclassified | -0.0544 | 0.0631 | 3.89E-01 |
| 16p13.11 | PDXDC1 | rs4500751 | PC 36:3 / PC O 38:4 | unclassified | -0.0418 | 0.0824 | 6.12E-01 |
| 16p13.11 | PDXDC1 | rs4500751 | PC 36:3 / PC O 38:3 | unclassified | 0.3548  | 0.2032 | 8.07E-02 |
| 16p13.11 | PDXDC1 | rs4500751 | PC 36:3 / PC O 38:2 | unclassified | -5.3578 | 1.8509 | 3.79E-03 |
| 16p13.11 | PDXDC1 | rs4500751 | PC 36:3 / PC O 38:1 | unclassified | -6.5767 | 5.6876 | 2.48E-01 |
| 16p13.11 | PDXDC1 | rs4500751 | PC 36:3 / PC 38:7   | unclassified | -1.0635 | 0.6287 | 9.07E-02 |
| 16p13.11 | PDXDC1 | rs4500751 | PC 36:3 / PC 38:6   | unclassified | -0.0105 | 0.0135 | 4.37E-01 |
| 16p13.11 | PDXDC1 | rs4500751 | PC 36:3 / PC 38:5   | unclassified | -0.0221 | 0.0154 | 1.50E-01 |
| 16p13.11 | PDXDC1 | rs4500751 | PC 36:3 / PC 38:4   | unclassified | 0.0055  | 0.0085 | 5.16E-01 |
| 16p13.11 | PDXDC1 | rs4500751 | PC 36:3 / PC 38:2   | unclassified | -2.5518 | 1.0342 | 1.36E-02 |
| 16p13.11 | PDXDC1 | rs4500751 | PC 36:3 / PC 38:1   | unclassified | -0.8597 | 0.3178 | 6.82E-03 |
| 16p13.11 | PDXDC1 | rs4500751 | PC 36:3 / PC 38:0   | unclassified | -0.3238 | 0.2332 | 1.65E-01 |
| 16p13.11 | PDXDC1 | rs4500751 | PC 36:3 / PC O 40:6 | unclassified | -0.4067 | 0.2904 | 1.61E-01 |
| 16p13.11 | PDXDC1 | rs4500751 | PC 36:3 / PC O 40:5 | unclassified | -0.4244 | 0.3873 | 2.73E-01 |
| 16p13.11 | PDXDC1 | rs4500751 | PC 36:3 / PC O 40:4 | unclassified | -0.6002 | 0.5616 | 2.85E-01 |
| 16p13.11 | PDXDC1 | rs4500751 | PC 36:3 / PC 40:7   | unclassified | -0.3878 | 0.1562 | 1.31E-02 |
| 16p13.11 | PDXDC1 | rs4500751 | PC 36:3 / PC 40:6   | unclassified | -0.0064 | 0.0460 | 8.89E-01 |
| 16p13.11 | PDXDC1 | rs4500751 | PC 36:3 / PC 40:5   | unclassified | -0.1309 | 0.1036 | 2.07E-01 |
| 16p13.11 | PDXDC1 | rs4500751 | PC 36:3 / PC 40:4   | unclassified | 0.0905  | 0.2952 | 7.59E-01 |
| 16p13.11 | PDXDC1 | rs4500751 | PC 36:3 / PC 40:2   | unclassified | -0.9260 | 1.0400 | 3.73E-01 |
| 16p13.11 | PDXDC1 | rs4500751 | PC 36:3 / PC 40:1   | unclassified | -2.1936 | 0.6963 | 1.63E-03 |
| 16p13.11 | PDXDC1 | rs4500751 | PC 36:3 / PC 40:0   | unclassified | -0.1676 | 1.4100 | 9.05E-01 |
| 16p13.11 | PDXDC1 | rs4500751 | PC 36:3 / PC O 42:6 | unclassified | -2.7309 | 1.6418 | 9.62E-02 |

|          |        |           |                     |              |         |        |          |
|----------|--------|-----------|---------------------|--------------|---------|--------|----------|
| 16p13.11 | PDXDC1 | rs4500751 | PC 36:3 / PC O 42:5 | unclassified | -1.0558 | 1.1434 | 3.56E-01 |
| 16p13.11 | PDXDC1 | rs4500751 | PC 36:3 / PC 42:5   | unclassified | -3.2007 | 1.7259 | 6.37E-02 |
| 16p13.11 | PDXDC1 | rs4500751 | PC 36:3 / PC 42:4   | unclassified | -2.4614 | 4.0517 | 5.44E-01 |
| 16p13.11 | PDXDC1 | rs4500751 | PC 38:3 / PC 26:0   | unclassified | -8.4111 | 2.1290 | 7.79E-05 |
| 16p13.11 | PDXDC1 | rs4500751 | PC 38:3 / PC 30:1   | unclassified | -6.7508 | 2.5117 | 7.19E-03 |
| 16p13.11 | PDXDC1 | rs4500751 | PC 38:3 / PC 30:0   | unclassified | -0.3397 | 0.1196 | 4.50E-03 |
| 16p13.11 | PDXDC1 | rs4500751 | PC 38:3 / PC O 32:1 | unclassified | -0.8759 | 0.1841 | 1.96E-06 |
| 16p13.11 | PDXDC1 | rs4500751 | PC 38:3 / PC O 32:0 | unclassified | -0.6912 | 0.1252 | 3.41E-08 |
| 16p13.11 | PDXDC1 | rs4500751 | PC 38:3 / PC 32:2   | unclassified | -0.7947 | 0.1238 | 1.35E-10 |
| 16p13.11 | PDXDC1 | rs4500751 | PC 38:3 / PC 32:1   | unclassified | -0.1227 | 0.0257 | 1.90E-06 |
| 16p13.11 | PDXDC1 | rs4500751 | PC 38:3 / PC 32:0   | unclassified | -0.1326 | 0.0222 | 2.25E-09 |
| 16p13.11 | PDXDC1 | rs4500751 | PC 38:3 / PC O 34:3 | unclassified | -0.4703 | 0.0764 | 7.54E-10 |
| 16p13.11 | PDXDC1 | rs4500751 | PC 38:3 / PC O 34:2 | unclassified | -0.2806 | 0.0394 | 1.13E-12 |
| 16p13.11 | PDXDC1 | rs4500751 | PC 38:3 / PC O 34:1 | unclassified | -0.2307 | 0.0364 | 2.40E-10 |
| 16p13.11 | PDXDC1 | rs4500751 | PC 38:3 / PC O 34:0 | unclassified | -0.9688 | 0.3043 | 1.46E-03 |
| 16p13.11 | PDXDC1 | rs4500751 | PC 38:3 / PC 34:4   | unclassified | -1.3760 | 0.2765 | 6.47E-07 |
| 16p13.11 | PDXDC1 | rs4500751 | PC 38:3 / PC 34:2   | unclassified | -0.0067 | 0.0007 | 3.88E-20 |
| 16p13.11 | PDXDC1 | rs4500751 | PC 38:3 / PC 34:1   | unclassified | -0.0085 | 0.0013 | 1.15E-10 |
| 16p13.11 | PDXDC1 | rs4500751 | PC 38:3 / PC 34:0   | unclassified | -0.2406 | 0.2036 | 2.37E-01 |
| 16p13.11 | PDXDC1 | rs4500751 | PC 38:3 / PC O 36:5 | unclassified | -0.2058 | 0.0412 | 5.76E-07 |
| 16p13.11 | PDXDC1 | rs4500751 | PC 38:3 / PC O 36:4 | unclassified | -0.1233 | 0.0244 | 4.18E-07 |
| 16p13.11 | PDXDC1 | rs4500751 | PC 38:3 / PC O 36:3 | unclassified | -0.3275 | 0.0520 | 3.01E-10 |
| 16p13.11 | PDXDC1 | rs4500751 | PC 38:3 / PC O 36:2 | unclassified | -0.2158 | 0.0311 | 4.29E-12 |
| 16p13.11 | PDXDC1 | rs4500751 | PC 38:3 / PC O 36:1 | unclassified | -0.2436 | 0.0404 | 1.66E-09 |
| 16p13.11 | PDXDC1 | rs4500751 | PC 38:3 / PC O 36:0 | unclassified | -3.0133 | 0.8737 | 5.63E-04 |
| 16p13.11 | PDXDC1 | rs4500751 | PC 38:3 / PC 36:5   | unclassified | -0.0869 | 0.0209 | 3.13E-05 |
| 16p13.11 | PDXDC1 | rs4500751 | PC 38:3 / PC 36:4   | unclassified | -0.0095 | 0.0017 | 2.47E-08 |
| 16p13.11 | PDXDC1 | rs4500751 | PC 38:3 / PC 36:2   | unclassified | -0.0114 | 0.0012 | 1.81E-20 |
| 16p13.11 | PDXDC1 | rs4500751 | PC 38:3 / PC 36:1   | unclassified | -0.0478 | 0.0071 | 1.68E-11 |
| 16p13.11 | PDXDC1 | rs4500751 | PC 38:3 / PC 36:0   | unclassified | -0.7616 | 0.2821 | 6.93E-03 |
| 16p13.11 | PDXDC1 | rs4500751 | PC 38:3 / PC O 38:5 | unclassified | -0.1209 | 0.0249 | 1.16E-06 |
| 16p13.11 | PDXDC1 | rs4500751 | PC 38:3 / PC O 38:4 | unclassified | -0.1354 | 0.0324 | 2.97E-05 |
| 16p13.11 | PDXDC1 | rs4500751 | PC 38:3 / PC O 38:3 | unclassified | -0.2013 | 0.0787 | 1.05E-02 |
| 16p13.11 | PDXDC1 | rs4500751 | PC 38:3 / PC O 38:2 | unclassified | -2.9325 | 0.6946 | 2.42E-05 |
| 16p13.11 | PDXDC1 | rs4500751 | PC 38:3 / PC O 38:1 | unclassified | -4.2202 | 1.8662 | 2.37E-02 |
| 16p13.11 | PDXDC1 | rs4500751 | PC 38:3 / PC O 40:6 | unclassified | -0.4752 | 0.1098 | 1.50E-05 |
| 16p13.11 | PDXDC1 | rs4500751 | PC 38:3 / PC O 40:5 | unclassified | -0.6306 | 0.1426 | 9.80E-06 |
| 16p13.11 | PDXDC1 | rs4500751 | PC 38:3 / PC O 40:4 | unclassified | -0.9019 | 0.2112 | 1.95E-05 |
| 16p13.11 | PDXDC1 | rs4500751 | PC 38:3 / PC 40:7   | unclassified | -0.3470 | 0.0620 | 2.18E-08 |
| 16p13.11 | PDXDC1 | rs4500751 | PC 38:3 / PC 40:6   | unclassified | -0.0545 | 0.0130 | 2.75E-05 |
| 16p13.11 | PDXDC1 | rs4500751 | PC 38:3 / PC 40:5   | unclassified | -0.1636 | 0.0271 | 1.60E-09 |

|          |        |           |                     |              |         |        |          |
|----------|--------|-----------|---------------------|--------------|---------|--------|----------|
| 16p13.11 | PDXDC1 | rs4500751 | PC 38:3 / PC 40:4   | unclassified | -0.3343 | 0.0827 | 5.29E-05 |
| 16p13.11 | PDXDC1 | rs4500751 | PC 38:3 / PC 40:2   | unclassified | -0.9296 | 0.3544 | 8.72E-03 |
| 16p13.11 | PDXDC1 | rs4500751 | PC 38:3 / PC 40:1   | unclassified | -0.9966 | 0.2425 | 3.96E-05 |
| 16p13.11 | PDXDC1 | rs4500751 | PC 38:3 / PC 40:0   | unclassified | -1.1215 | 0.4663 | 1.62E-02 |
| 16p13.11 | PDXDC1 | rs4500751 | PC 38:3 / PC O 42:6 | unclassified | -2.3465 | 0.5745 | 4.42E-05 |
| 16p13.11 | PDXDC1 | rs4500751 | PC 38:3 / PC O 42:5 | unclassified | -1.4771 | 0.4133 | 3.52E-04 |
| 16p13.11 | PDXDC1 | rs4500751 | PC 38:3 / PC 42:5   | unclassified | -2.2158 | 0.5454 | 4.85E-05 |
| 16p13.11 | PDXDC1 | rs4500751 | PC 38:3 / PC 42:4   | unclassified | -2.9028 | 1.2988 | 2.54E-02 |
| 16p13.11 | PDXDC1 | rs4500751 | PE 38:3 / PE 32:2   | unclassified | -0.1656 | 0.0585 | 4.68E-03 |
| 16p13.11 | PDXDC1 | rs4500751 | PE 38:3 / PE 32:1   | unclassified | -0.0813 | 0.0209 | 1.03E-04 |
| 16p13.11 | PDXDC1 | rs4500751 | PE 38:3 / PE 32:0   | unclassified | -0.1535 | 0.0594 | 9.73E-03 |
| 16p13.11 | PDXDC1 | rs4500751 | PE 38:3 / PE 34:2   | unclassified | -0.0074 | 0.0010 | 1.38E-14 |
| 16p13.11 | PDXDC1 | rs4500751 | PE 38:3 / PE 34:1   | unclassified | -0.0089 | 0.0019 | 5.02E-06 |
| 16p13.11 | PDXDC1 | rs4500751 | PE 38:3 / PE 34:0   | unclassified | -0.1423 | 0.0762 | 6.18E-02 |
| 16p13.11 | PDXDC1 | rs4500751 | PE 38:3 / PE 36:5   | unclassified | -0.0834 | 0.0195 | 1.84E-05 |
| 16p13.11 | PDXDC1 | rs4500751 | PE 38:3 / PE 36:4   | unclassified | -0.0070 | 0.0018 | 1.03E-04 |
| 16p13.11 | PDXDC1 | rs4500751 | PE 38:3 / PE 36:2   | unclassified | -0.0060 | 0.0007 | 3.35E-17 |
| 16p13.11 | PDXDC1 | rs4500751 | PE 38:3 / PE 36:1   | unclassified | -0.0239 | 0.0044 | 6.46E-08 |
| 16p13.11 | PDXDC1 | rs4500751 | PE 38:3 / PE O 38:7 | unclassified | -0.1199 | 0.0741 | 1.05E-01 |
| 16p13.11 | PDXDC1 | rs4500751 | PE 38:3 / PE 38:6   | unclassified | -0.0073 | 0.0020 | 2.21E-04 |
| 16p13.11 | PDXDC1 | rs4500751 | PE 38:3 / PE 38:5   | unclassified | -0.0153 | 0.0029 | 1.04E-07 |
| 16p13.11 | PDXDC1 | rs4500751 | PE 38:3 / PE 38:4   | unclassified | -0.0030 | 0.0010 | 2.17E-03 |
| 16p13.11 | PDXDC1 | rs4500751 | PE 38:3 / PE 38:2   | unclassified | -0.1653 | 0.0435 | 1.44E-04 |
| 16p13.11 | PDXDC1 | rs4500751 | PE 38:3 / PE 38:1   | unclassified | -0.0914 | 0.0395 | 2.07E-02 |
| 16p13.11 | PDXDC1 | rs4500751 | PE 38:3 / PE O 40:3 | unclassified | -0.0371 | 0.0072 | 3.06E-07 |
| 16p13.11 | PDXDC1 | rs4500751 | PE 38:3 / PE 40:6   | unclassified | -0.0096 | 0.0032 | 2.61E-03 |
| 16p13.11 | PDXDC1 | rs4500751 | PE 38:3 / PE 40:5   | unclassified | -0.0416 | 0.0096 | 1.50E-05 |
| 16p13.11 | PDXDC1 | rs4500751 | PE 38:3 / PE 40:4   | unclassified | -0.1199 | 0.0319 | 1.72E-04 |
| 16p13.11 | PDXDC1 | rs4500751 | PE 38:3 / PE 42:7   | unclassified | -0.4566 | 0.1433 | 1.44E-03 |
| 16p13.11 | PDXDC1 | rs4500751 | PE 38:3 / PE 42:6   | unclassified | -0.5943 | 0.2395 | 1.31E-02 |
| 16p13.11 | PDXDC1 | rs4500751 | PE 38:3 / PE 42:5   | unclassified | -0.7820 | 0.2958 | 8.21E-03 |
| 16p13.11 | PDXDC1 | rs4500751 | LPC 20:3 / LPC 16:1 | unclassified | -0.0588 | 0.0059 | 4.01E-23 |
| 16p13.11 | PDXDC1 | rs4500751 | PC 36:3 / PC 34:2   | unclassified | -0.0119 | 0.0011 | 4.37E-25 |
| 16p13.3  | ALG1   | rs870288  | PC 30:1 / PC 32:1   | elongation   | -0.0061 | 0.0022 | 6.58E-03 |
| 16p13.3  | ALG1   | rs870288  | PC 30:1 / PC 34:1   | elongation   | -0.0006 | 0.0001 | 8.56E-05 |
| 16p13.3  | ALG1   | rs870288  | PC 30:1 / PC 36:1   | elongation   | -0.0032 | 0.0008 | 9.45E-05 |
| 16p13.3  | ALG1   | rs870288  | PC 30:1 / PC 38:1   | elongation   | -0.0198 | 0.0064 | 2.13E-03 |
| 16p13.3  | ALG1   | rs870288  | PC 30:1 / PC 40:1   | elongation   | -0.0431 | 0.0131 | 1.04E-03 |
| 16p13.3  | ALG1   | rs870288  | PC 30:1 / PC 26:0   | unclassified | -0.1847 | 0.1012 | 6.80E-02 |
| 16p13.3  | ALG1   | rs870288  | PC 30:1 / PC 30:0   | unclassified | -0.0206 | 0.0092 | 2.61E-02 |
| 16p13.3  | ALG1   | rs870288  | PC 30:1 / PC O 32:1 | unclassified | -0.0504 | 0.0129 | 9.22E-05 |

|         |      |          |                     |              |         |        |          |
|---------|------|----------|---------------------|--------------|---------|--------|----------|
| 16p13.3 | ALG1 | rs870288 | PC 30:1 / PC O 32:0 | unclassified | -0.0421 | 0.0098 | 1.64E-05 |
| 16p13.3 | ALG1 | rs870288 | PC 30:1 / PC 32:2   | unclassified | -0.0342 | 0.0107 | 1.36E-03 |
| 16p13.3 | ALG1 | rs870288 | PC 30:1 / PC 32:0   | unclassified | -0.0088 | 0.0021 | 2.94E-05 |
| 16p13.3 | ALG1 | rs870288 | PC 30:1 / PC O 34:3 | unclassified | -0.0185 | 0.0050 | 1.97E-04 |
| 16p13.3 | ALG1 | rs870288 | PC 30:1 / PC O 34:2 | unclassified | -0.0121 | 0.0030 | 6.20E-05 |
| 16p13.3 | ALG1 | rs870288 | PC 30:1 / PC O 34:1 | unclassified | -0.0147 | 0.0033 | 9.72E-06 |
| 16p13.3 | ALG1 | rs870288 | PC 30:1 / PC O 34:0 | unclassified | -0.0672 | 0.0229 | 3.38E-03 |
| 16p13.3 | ALG1 | rs870288 | PC 30:1 / PC 34:4   | unclassified | -0.0533 | 0.0241 | 2.69E-02 |
| 16p13.3 | ALG1 | rs870288 | PC 30:1 / PC 34:3   | unclassified | -0.0062 | 0.0021 | 2.87E-03 |
| 16p13.3 | ALG1 | rs870288 | PC 30:1 / PC 34:2   | unclassified | -0.0003 | 0.0001 | 8.69E-06 |
| 16p13.3 | ALG1 | rs870288 | PC 30:1 / PC 34:0   | unclassified | -0.0281 | 0.0123 | 2.23E-02 |
| 16p13.3 | ALG1 | rs870288 | PC 30:1 / PC O 36:5 | unclassified | -0.0121 | 0.0033 | 2.03E-04 |
| 16p13.3 | ALG1 | rs870288 | PC 30:1 / PC O 36:4 | unclassified | -0.0094 | 0.0022 | 1.31E-05 |
| 16p13.3 | ALG1 | rs870288 | PC 30:1 / PC O 36:3 | unclassified | -0.0171 | 0.0045 | 1.54E-04 |
| 16p13.3 | ALG1 | rs870288 | PC 30:1 / PC O 36:2 | unclassified | -0.0103 | 0.0024 | 2.20E-05 |
| 16p13.3 | ALG1 | rs870288 | PC 30:1 / PC O 36:1 | unclassified | -0.0152 | 0.0037 | 4.26E-05 |
| 16p13.3 | ALG1 | rs870288 | PC 30:1 / PC O 36:0 | unclassified | -0.1477 | 0.0447 | 9.59E-04 |
| 16p13.3 | ALG1 | rs870288 | PC 30:1 / PC 36:5   | unclassified | -0.0039 | 0.0016 | 1.77E-02 |
| 16p13.3 | ALG1 | rs870288 | PC 30:1 / PC 36:4   | unclassified | -0.0008 | 0.0002 | 1.21E-05 |
| 16p13.3 | ALG1 | rs870288 | PC 30:1 / PC 36:3   | unclassified | -0.0010 | 0.0002 | 4.97E-05 |
| 16p13.3 | ALG1 | rs870288 | PC 30:1 / PC 36:2   | unclassified | -0.0006 | 0.0001 | 8.77E-06 |
| 16p13.3 | ALG1 | rs870288 | PC 30:1 / PC 36:0   | unclassified | -0.0429 | 0.0133 | 1.25E-03 |
| 16p13.3 | ALG1 | rs870288 | PC 30:1 / PC O 38:5 | unclassified | -0.0092 | 0.0021 | 1.22E-05 |
| 16p13.3 | ALG1 | rs870288 | PC 30:1 / PC O 38:4 | unclassified | -0.0127 | 0.0029 | 1.24E-05 |
| 16p13.3 | ALG1 | rs870288 | PC 30:1 / PC O 38:3 | unclassified | -0.0302 | 0.0079 | 1.29E-04 |
| 16p13.3 | ALG1 | rs870288 | PC 30:1 / PC O 38:2 | unclassified | -0.0351 | 0.0277 | 2.04E-01 |
| 16p13.3 | ALG1 | rs870288 | PC 30:1 / PC O 38:1 | unclassified | -0.2107 | 0.0774 | 6.49E-03 |
| 16p13.3 | ALG1 | rs870288 | PC 30:1 / PC 38:7   | unclassified | -0.0419 | 0.0151 | 5.54E-03 |
| 16p13.3 | ALG1 | rs870288 | PC 30:1 / PC 38:6   | unclassified | -0.0015 | 0.0004 | 8.48E-05 |
| 16p13.3 | ALG1 | rs870288 | PC 30:1 / PC 38:5   | unclassified | -0.0021 | 0.0006 | 2.93E-04 |
| 16p13.3 | ALG1 | rs870288 | PC 30:1 / PC 38:4   | unclassified | -0.0013 | 0.0003 | 9.32E-06 |
| 16p13.3 | ALG1 | rs870288 | PC 30:1 / PC 38:3   | unclassified | -0.0034 | 0.0009 | 7.58E-05 |
| 16p13.3 | ALG1 | rs870288 | PC 30:1 / PC 38:2   | unclassified | -0.0284 | 0.0105 | 6.83E-03 |
| 16p13.3 | ALG1 | rs870288 | PC 30:1 / PC 38:0   | unclassified | -0.0198 | 0.0059 | 8.11E-04 |
| 16p13.3 | ALG1 | rs870288 | PC 30:1 / PC O 40:6 | unclassified | -0.0352 | 0.0080 | 1.20E-05 |
| 16p13.3 | ALG1 | rs870288 | PC 30:1 / PC O 40:5 | unclassified | -0.0462 | 0.0107 | 1.46E-05 |
| 16p13.3 | ALG1 | rs870288 | PC 30:1 / PC O 40:4 | unclassified | -0.0748 | 0.0163 | 4.27E-06 |
| 16p13.3 | ALG1 | rs870288 | PC 30:1 / PC 40:7   | unclassified | -0.0193 | 0.0050 | 1.07E-04 |
| 16p13.3 | ALG1 | rs870288 | PC 30:1 / PC 40:6   | unclassified | -0.0051 | 0.0012 | 2.59E-05 |
| 16p13.3 | ALG1 | rs870288 | PC 30:1 / PC 40:5   | unclassified | -0.0135 | 0.0035 | 9.14E-05 |
| 16p13.3 | ALG1 | rs870288 | PC 30:1 / PC 40:4   | unclassified | -0.0387 | 0.0097 | 7.03E-05 |

|         |         |            |                            |               |         |        |          |
|---------|---------|------------|----------------------------|---------------|---------|--------|----------|
| 16p13.3 | ALG1    | rs870288   | PC 30:1 / PC 40:3          | unclassified  | -0.0529 | 0.0181 | 3.50E-03 |
| 16p13.3 | ALG1    | rs870288   | PC 30:1 / PC 40:2          | unclassified  | -0.0697 | 0.0207 | 7.51E-04 |
| 16p13.3 | ALG1    | rs870288   | PC 30:1 / PC 40:0          | unclassified  | -0.0909 | 0.0273 | 8.71E-04 |
| 16p13.3 | ALG1    | rs870288   | PC 30:1 / PC O 42:6        | unclassified  | -0.1482 | 0.0327 | 5.92E-06 |
| 16p13.3 | ALG1    | rs870288   | PC 30:1 / PC O 42:5        | unclassified  | -0.1062 | 0.0261 | 4.68E-05 |
| 16p13.3 | ALG1    | rs870288   | PC 30:1 / PC 42:5          | unclassified  | -0.0994 | 0.0275 | 3.04E-04 |
| 16p13.3 | ALG1    | rs870288   | PC 30:1 / PC 42:4          | unclassified  | -0.1841 | 0.0645 | 4.31E-03 |
| 16q23.1 | CNTNAP4 | rs4485401  | Glu-CER 24:1 / CER 24:1    | glucosylation | 0.0112  | 0.0032 | 4.45E-04 |
| 16q23.1 | CNTNAP4 | rs4485401  | Glu-CER 24:1 / CER 16:0    | unclassified  | 0.0178  | 0.0050 | 3.72E-04 |
| 16q23.1 | CNTNAP4 | rs4485401  | Glu-CER 24:1 / CER 18:0    | unclassified  | 0.1025  | 0.0253 | 5.16E-05 |
| 16q23.1 | CNTNAP4 | rs4485401  | Glu-CER 24:1 / CER 20:0    | unclassified  | 0.1089  | 0.0275 | 7.40E-05 |
| 16q23.1 | CNTNAP4 | rs4485401  | Glu-CER 24:1 / CER 22:0    | unclassified  | 0.0244  | 0.0051 | 1.47E-06 |
| 16q23.1 | CNTNAP4 | rs4485401  | Glu-CER 24:1 / CER 23:0    | unclassified  | 0.0251  | 0.0060 | 2.87E-05 |
| 16q23.1 | CNTNAP4 | rs4485401  | Glu-CER 24:1 / CER 24:0    | unclassified  | 0.0088  | 0.0019 | 2.29E-06 |
| 16q23.1 | CNTNAP4 | rs4485401  | Glu-CER 24:1 / Glu-CER16:0 | unclassified  | 0.0210  | 0.0063 | 8.94E-04 |
| 17p13.2 | PLD2    | rs12051548 | SPM 23:0 / SPM 14:0        | elongation    | -0.1013 | 0.0235 | 1.59E-05 |
| 17p13.2 | PLD2    | rs12051548 | SPM 23:0 / SPM 15:0        | elongation    | -0.1848 | 0.0376 | 8.80E-07 |
| 17p13.2 | PLD2    | rs12051548 | SPM 23:0 / SPM 16:0        | elongation    | -0.0093 | 0.0017 | 2.24E-08 |
| 17p13.2 | PLD2    | rs12051548 | SPM 23:0 / SPM 18:0        | elongation    | -0.0421 | 0.0093 | 6.22E-06 |
| 17p13.2 | PLD2    | rs12051548 | SPM 23:0 / SPM 20:0        | elongation    | 0.0758  | 0.0536 | 1.57E-01 |
| 17p13.2 | PLD2    | rs12051548 | SPM 23:0 / SPM 24:0        | elongation    | -0.0144 | 0.0086 | 9.50E-02 |
| 17p13.2 | PLD2    | rs12051548 | SPM 23:0 / SPM 23:1        | saturation    | -0.0682 | 0.0132 | 2.54E-07 |
| 17p13.2 | PLD2    | rs12051548 | SPM 23:0 / SPM dih 16:0    | unclassified  | -0.0406 | 0.0625 | 5.16E-01 |
| 17p13.2 | PLD2    | rs12051548 | SPM 23:0 / SPM 17:0        | unclassified  | -0.3157 | 0.0633 | 6.14E-07 |
| 17p13.2 | PLD2    | rs12051548 | SPM 23:0 / SPM 18:2        | unclassified  | -1.6595 | 0.5427 | 2.23E-03 |
| 17p13.2 | PLD2    | rs12051548 | SPM 23:0 / SPM 18:1        | unclassified  | -0.1148 | 0.0211 | 5.04E-08 |
| 17p13.2 | PLD2    | rs12051548 | SPM 23:0 / SPM dih 18:0    | unclassified  | -0.3372 | 1.5948 | 8.33E-01 |
| 17p13.2 | PLD2    | rs12051548 | SPM 23:0 / SPM 20:1        | unclassified  | -0.1154 | 0.0406 | 4.45E-03 |
| 17p13.2 | PLD2    | rs12051548 | SPM 23:0 / SPM 22:2        | unclassified  | 1.0854  | 1.4841 | 4.65E-01 |
| 17p13.2 | PLD2    | rs12051548 | SPM 23:0 / SPM 22:1        | unclassified  | -0.0376 | 0.0079 | 2.13E-06 |
| 17p13.2 | PLD2    | rs12051548 | SPM 23:0 / SPM 22:0        | unclassified  | -0.0066 | 0.0061 | 2.83E-01 |
| 17p13.2 | PLD2    | rs12051548 | SPM 23:0 / SPM dih 22:0    | unclassified  | 0.3693  | 2.2341 | 8.69E-01 |
| 17p13.2 | PLD2    | rs12051548 | SPM 23:0 / SPM dih 23:0    | unclassified  | -2.5432 | 2.4830 | 3.06E-01 |
| 17p13.2 | PLD2    | rs12051548 | SPM 23:0 / SPM 24:3        | unclassified  | -1.1067 | 0.5732 | 5.35E-02 |
| 17p13.2 | PLD2    | rs12051548 | SPM 23:0 / SPM 24:2        | unclassified  | -0.0393 | 0.0091 | 1.72E-05 |
| 17p13.2 | PLD2    | rs12051548 | SPM 23:0 / SPM 24:1        | unclassified  | -0.0118 | 0.0033 | 4.44E-04 |
| 17p13.2 | PLD2    | rs12051548 | SPM 23:0 / SPM dih 24:0    | unclassified  | -3.4499 | 2.8752 | 2.30E-01 |
| 17p13.2 | PLD2    | rs12051548 | SPM 23:0 / SPM 16:1        | unclassified  | -0.0788 | 0.0124 | 2.43E-10 |
| 18q11.2 | ABHD3   | rs11662721 | PC 32:2 / PC 34:2          | elongation    | 0.0005  | 0.0001 | 6.99E-08 |
| 18q11.2 | ABHD3   | rs11662721 | PC 32:2 / PC 38:2          | elongation    | 0.0525  | 0.0347 | 1.31E-01 |
| 18q11.2 | ABHD3   | rs11662721 | PC 32:2 / PC 40:2          | elongation    | 0.0704  | 0.0510 | 1.67E-01 |



|         |       |            |                     |              |         |        |          |
|---------|-------|------------|---------------------|--------------|---------|--------|----------|
| 18q11.2 | ABHD3 | rs11662721 | PC 32:2 / PC 32:1   | saturation   | 0.0086  | 0.0035 | 1.32E-02 |
| 18q11.2 | ABHD3 | rs11662721 | PC 32:2 / PC 32:0   | saturation   | 0.0144  | 0.0032 | 6.83E-06 |
| 18q11.2 | ABHD3 | rs11662721 | PC 32:2 / PC 26:0   | unclassified | 0.0881  | 0.2369 | 7.10E-01 |
| 18q11.2 | ABHD3 | rs11662721 | PC 32:2 / PC 30:1   | unclassified | -0.1862 | 0.3179 | 5.58E-01 |
| 18q11.2 | ABHD3 | rs11662721 | PC 32:2 / PC 30:0   | unclassified | 0.0363  | 0.0129 | 4.85E-03 |
| 18q11.2 | ABHD3 | rs11662721 | PC 32:2 / PC O 32:1 | unclassified | 0.0918  | 0.0242 | 1.47E-04 |
| 18q11.2 | ABHD3 | rs11662721 | PC 32:2 / PC O 32:0 | unclassified | 0.0551  | 0.0162 | 6.55E-04 |
| 18q11.2 | ABHD3 | rs11662721 | PC 32:2 / PC O 34:3 | unclassified | 0.0415  | 0.0092 | 5.79E-06 |
| 18q11.2 | ABHD3 | rs11662721 | PC 32:2 / PC O 34:2 | unclassified | 0.0190  | 0.0047 | 4.49E-05 |
| 18q11.2 | ABHD3 | rs11662721 | PC 32:2 / PC O 34:1 | unclassified | 0.0234  | 0.0052 | 6.95E-06 |
| 18q11.2 | ABHD3 | rs11662721 | PC 32:2 / PC O 34:0 | unclassified | 0.1439  | 0.0415 | 5.21E-04 |
| 18q11.2 | ABHD3 | rs11662721 | PC 32:2 / PC 34:4   | unclassified | 0.0881  | 0.0285 | 2.02E-03 |
| 18q11.2 | ABHD3 | rs11662721 | PC 32:2 / PC 34:3   | unclassified | 0.0117  | 0.0022 | 1.76E-07 |
| 18q11.2 | ABHD3 | rs11662721 | PC 32:2 / PC 34:1   | unclassified | 0.0010  | 0.0002 | 4.73E-06 |
| 18q11.2 | ABHD3 | rs11662721 | PC 32:2 / PC 34:0   | unclassified | 0.0176  | 0.0350 | 6.15E-01 |
| 18q11.2 | ABHD3 | rs11662721 | PC 32:2 / PC O 36:5 | unclassified | 0.0269  | 0.0063 | 2.29E-05 |
| 18q11.2 | ABHD3 | rs11662721 | PC 32:2 / PC O 36:4 | unclassified | 0.0178  | 0.0039 | 3.95E-06 |
| 18q11.2 | ABHD3 | rs11662721 | PC 32:2 / PC O 36:3 | unclassified | 0.0365  | 0.0072 | 3.62E-07 |
| 18q11.2 | ABHD3 | rs11662721 | PC 32:2 / PC O 36:2 | unclassified | 0.0196  | 0.0039 | 4.87E-07 |
| 18q11.2 | ABHD3 | rs11662721 | PC 32:2 / PC O 36:1 | unclassified | 0.0276  | 0.0061 | 5.40E-06 |
| 18q11.2 | ABHD3 | rs11662721 | PC 32:2 / PC O 36:0 | unclassified | 0.3795  | 0.1227 | 1.98E-03 |
| 18q11.2 | ABHD3 | rs11662721 | PC 32:2 / PC 36:5   | unclassified | 0.0138  | 0.0031 | 9.09E-06 |
| 18q11.2 | ABHD3 | rs11662721 | PC 32:2 / PC 36:4   | unclassified | 0.0014  | 0.0003 | 7.81E-07 |
| 18q11.2 | ABHD3 | rs11662721 | PC 32:2 / PC 36:1   | unclassified | 0.0065  | 0.0014 | 1.36E-06 |
| 18q11.2 | ABHD3 | rs11662721 | PC 32:2 / PC 36:0   | unclassified | 0.0548  | 0.0373 | 1.42E-01 |
| 18q11.2 | ABHD3 | rs11662721 | PC 32:2 / PC O 38:5 | unclassified | 0.0161  | 0.0040 | 4.55E-05 |
| 18q11.2 | ABHD3 | rs11662721 | PC 32:2 / PC O 38:4 | unclassified | 0.0250  | 0.0054 | 3.67E-06 |
| 18q11.2 | ABHD3 | rs11662721 | PC 32:2 / PC O 38:3 | unclassified | 0.0631  | 0.0131 | 1.53E-06 |
| 18q11.2 | ABHD3 | rs11662721 | PC 32:2 / PC O 38:2 | unclassified | 0.2475  | 0.0726 | 6.56E-04 |
| 18q11.2 | ABHD3 | rs11662721 | PC 32:2 / PC O 38:1 | unclassified | 0.5684  | 0.2311 | 1.39E-02 |
| 18q11.2 | ABHD3 | rs11662721 | PC 32:2 / PC 38:7   | unclassified | 0.0620  | 0.0293 | 3.42E-02 |
| 18q11.2 | ABHD3 | rs11662721 | PC 32:2 / PC 38:6   | unclassified | 0.0021  | 0.0007 | 2.47E-03 |
| 18q11.2 | ABHD3 | rs11662721 | PC 32:2 / PC 38:5   | unclassified | 0.0052  | 0.0010 | 1.58E-07 |
| 18q11.2 | ABHD3 | rs11662721 | PC 32:2 / PC 38:4   | unclassified | 0.0028  | 0.0006 | 5.25E-07 |
| 18q11.2 | ABHD3 | rs11662721 | PC 32:2 / PC 38:1   | unclassified | 0.0084  | 0.0167 | 6.17E-01 |
| 18q11.2 | ABHD3 | rs11662721 | PC 32:2 / PC 38:0   | unclassified | 0.0338  | 0.0127 | 7.96E-03 |
| 18q11.2 | ABHD3 | rs11662721 | PC 32:2 / PC O 40:6 | unclassified | 0.0544  | 0.0158 | 5.90E-04 |
| 18q11.2 | ABHD3 | rs11662721 | PC 32:2 / PC O 40:5 | unclassified | 0.0762  | 0.0224 | 6.58E-04 |
| 18q11.2 | ABHD3 | rs11662721 | PC 32:2 / PC O 40:4 | unclassified | 0.1034  | 0.0323 | 1.37E-03 |
| 18q11.2 | ABHD3 | rs11662721 | PC 32:2 / PC 40:7   | unclassified | 0.0370  | 0.0092 | 5.75E-05 |
| 18q11.2 | ABHD3 | rs11662721 | PC 32:2 / PC 40:6   | unclassified | 0.0072  | 0.0023 | 2.02E-03 |

|          |       |            |                         |               |         |        |          |
|----------|-------|------------|-------------------------|---------------|---------|--------|----------|
| 18q11.2  | ABHD3 | rs11662721 | PC 32:2 / PC 40:5       | unclassified  | 0.0259  | 0.0061 | 2.29E-05 |
| 18q11.2  | ABHD3 | rs11662721 | PC 32:2 / PC 40:4       | unclassified  | 0.0936  | 0.0179 | 1.81E-07 |
| 18q11.2  | ABHD3 | rs11662721 | PC 32:2 / PC 40:3       | unclassified  | 0.0863  | 0.0407 | 3.41E-02 |
| 18q11.2  | ABHD3 | rs11662721 | PC 32:2 / PC 40:1       | unclassified  | 0.0437  | 0.0332 | 1.88E-01 |
| 18q11.2  | ABHD3 | rs11662721 | PC 32:2 / PC 40:0       | unclassified  | 0.1234  | 0.0670 | 6.55E-02 |
| 18q11.2  | ABHD3 | rs11662721 | PC 32:2 / PC O 42:6     | unclassified  | 0.1441  | 0.0790 | 6.81E-02 |
| 18q11.2  | ABHD3 | rs11662721 | PC 32:2 / PC O 42:5     | unclassified  | 0.2574  | 0.0595 | 1.52E-05 |
| 18q11.2  | ABHD3 | rs11662721 | PC 32:2 / PC 42:5       | unclassified  | 0.0235  | 0.0801 | 7.69E-01 |
| 18q11.2  | ABHD3 | rs11662721 | PC 32:2 / PC 42:4       | unclassified  | 0.2010  | 0.1805 | 2.66E-01 |
| 18q11.2  | ABHD3 | rs11662721 | PC 32:2 / PC 36:2       | elongation    | 0.0011  | 0.0002 | 9.35E-10 |
| 18q11.2  | ABHD3 | rs11662721 | PC 32:2 / PC 36:3       | unclassified  | 0.0018  | 0.0003 | 1.80E-09 |
| 18q11.2  | ABHD3 | rs11662721 | PC 32:2 / PC 38:3       | unclassified  | 0.0075  | 0.0013 | 6.71E-09 |
| 19p13.11 | LPAR  | rs2304130  | CER18:0 / CER 16:0      | elongation    | -0.0088 | 0.0030 | 3.30E-03 |
| 19p13.11 | LPAR  | rs2304130  | CER18:0 / CER 20:0      | elongation    | -0.0213 | 0.0095 | 2.45E-02 |
| 19p13.11 | LPAR  | rs2304130  | CER18:0 / CER 22:0      | elongation    | -0.0086 | 0.0021 | 3.38E-05 |
| 19p13.11 | LPAR  | rs2304130  | CER18:0 / CER 23:0      | elongation    | -0.0113 | 0.0026 | 1.72E-05 |
| 19p13.11 | LPAR  | rs2304130  | CER18:0 / CER 24:0      | elongation    | -0.0047 | 0.0009 | 2.67E-07 |
| 19p13.11 | LPAR  | rs2304130  | CER18:0 / CER 24:1      | unclassified  | -0.0075 | 0.0016 | 4.24E-06 |
| 19p13.11 | LPAR  | rs2304130  | CER18:0 / Glu-CER 16:0  | unclassified  | -0.0072 | 0.0071 | 3.06E-01 |
| 19p13.11 | LPAR  | rs2304130  | CER18:0 / Glu-CER 24:1  | unclassified  | -0.0032 | 0.0062 | 6.12E-01 |
| 19q13.32 | APOE  | rs7259004  | SPM 22:0 / SPM 14:0     | elongation    | -0.2242 | 0.0526 | 2.06E-05 |
| 19q13.32 | APOE  | rs7259004  | SPM 22:0 / SPM 15:0     | elongation    | -0.4065 | 0.0949 | 1.85E-05 |
| 19q13.32 | APOE  | rs7259004  | SPM 22:0 / SPM 16:0     | elongation    | -0.0160 | 0.0034 | 2.88E-06 |
| 19q13.32 | APOE  | rs7259004  | SPM 22:0 / SPM 18:0     | elongation    | -0.0500 | 0.0209 | 1.67E-02 |
| 19q13.32 | APOE  | rs7259004  | SPM 22:0 / SPM 20:0     | elongation    | -0.0890 | 0.0584 | 1.27E-01 |
| 19q13.32 | APOE  | rs7259004  | SPM 22:0 / SPM 23:0     | elongation    | -0.0322 | 0.0256 | 2.07E-01 |
| 19q13.32 | APOE  | rs7259004  | SPM 22:0 / SPM 24:0     | elongation    | 0.0091  | 0.0162 | 5.74E-01 |
| 19q13.32 | APOE  | rs7259004  | SPM 24:0 / SPM 14:0     | elongation    | -0.1543 | 0.0382 | 5.48E-05 |
| 19q13.32 | APOE  | rs7259004  | SPM 24:0 / SPM 15:0     | elongation    | -0.2740 | 0.0699 | 8.98E-05 |
| 19q13.32 | APOE  | rs7259004  | SPM 24:0 / SPM 16:0     | elongation    | -0.0098 | 0.0022 | 9.05E-06 |
| 19q13.32 | APOE  | rs7259004  | SPM 24:0 / SPM 18:0     | elongation    | -0.0325 | 0.0148 | 2.76E-02 |
| 19q13.32 | APOE  | rs7259004  | SPM 24:0 / SPM 20:0     | elongation    | -0.0577 | 0.0453 | 2.03E-01 |
| 19q13.32 | APOE  | rs7259004  | SPM 24:0 / SPM 23:0     | elongation    | -0.0185 | 0.0172 | 2.84E-01 |
| 19q13.32 | APOE  | rs7259004  | SPM 22:0 / SPM dih 22:0 | hydroxylation | 2.3039  | 3.1022 | 4.58E-01 |
| 19q13.32 | APOE  | rs7259004  | SPM 22:0 / SPM 22:2     | saturation    | -2.5994 | 2.5108 | 3.01E-01 |
| 19q13.32 | APOE  | rs7259004  | SPM 22:0 / SPM 22:1     | saturation    | -0.0584 | 0.0150 | 9.70E-05 |
| 19q13.32 | APOE  | rs7259004  | SPM 24:0 / SPM 24:3     | saturation    | -0.9002 | 0.5515 | 1.03E-01 |
| 19q13.32 | APOE  | rs7259004  | SPM 24:0 / SPM 24:2     | saturation    | -0.0707 | 0.0121 | 5.11E-09 |
| 19q13.32 | APOE  | rs7259004  | SPM 24:0 / SPM 24:1     | saturation    | -0.0199 | 0.0039 | 3.74E-07 |
| 19q13.32 | APOE  | rs7259004  | SPM 22:0 / SPM 16:1     | unclassified  | -0.1415 | 0.0252 | 1.98E-08 |
| 19q13.32 | APOE  | rs7259004  | SPM 22:0 / SPM dih 16:0 | unclassified  | -0.0848 | 0.1316 | 5.19E-01 |

|          |      |           |                         |              |         |        |          |
|----------|------|-----------|-------------------------|--------------|---------|--------|----------|
| 19q13.32 | APOE | rs7259004 | SPM 22:0 / SPM 17:0     | unclassified | -0.5759 | 0.1623 | 3.89E-04 |
| 19q13.32 | APOE | rs7259004 | SPM 22:0 / SPM 18:2     | unclassified | -2.7498 | 1.0348 | 7.88E-03 |
| 19q13.32 | APOE | rs7259004 | SPM 22:0 / SPM 18:1     | unclassified | -0.1628 | 0.0454 | 3.32E-04 |
| 19q13.32 | APOE | rs7259004 | SPM 22:0 / SPM dih 18:0 | unclassified | -1.9022 | 2.5833 | 4.62E-01 |
| 19q13.32 | APOE | rs7259004 | SPM 22:0 / SPM 20:1     | unclassified | -0.3422 | 0.0822 | 3.12E-05 |
| 19q13.32 | APOE | rs7259004 | SPM 22:0 / SPM 23:1     | unclassified | -0.1418 | 0.0386 | 2.36E-04 |
| 19q13.32 | APOE | rs7259004 | SPM 22:0 / SPM dih 23:0 | unclassified | -7.7533 | 4.1561 | 6.21E-02 |
| 19q13.32 | APOE | rs7259004 | SPM 22:0 / SPM 24:3     | unclassified | -1.3237 | 0.8068 | 1.01E-01 |
| 19q13.32 | APOE | rs7259004 | SPM 22:0 / SPM 24:2     | unclassified | -0.1051 | 0.0189 | 2.91E-08 |
| 19q13.32 | APOE | rs7259004 | SPM 22:0 / SPM 24:1     | unclassified | -0.0316 | 0.0069 | 4.52E-06 |
| 19q13.32 | APOE | rs7259004 | SPM 22:0 / SPM dih 24:0 | unclassified | -0.9234 | 4.8614 | 8.49E-01 |
| 19q13.32 | APOE | rs7259004 | SPM 24:0 / SPM 16:1     | unclassified | -0.0929 | 0.0170 | 4.79E-08 |
| 19q13.32 | APOE | rs7259004 | SPM 24:0 / SPM dih 16:0 | unclassified | -0.0549 | 0.0831 | 5.09E-01 |
| 19q13.32 | APOE | rs7259004 | SPM 24:0 / SPM 17:0     | unclassified | -0.3778 | 0.1174 | 1.28E-03 |
| 19q13.32 | APOE | rs7259004 | SPM 24:0 / SPM 18:2     | unclassified | -1.9144 | 0.7592 | 1.17E-02 |
| 19q13.32 | APOE | rs7259004 | SPM 24:0 / SPM 18:1     | unclassified | -0.1052 | 0.0321 | 1.04E-03 |
| 19q13.32 | APOE | rs7259004 | SPM 24:0 / SPM dih 18:0 | unclassified | -1.1139 | 1.7786 | 5.31E-01 |
| 19q13.32 | APOE | rs7259004 | SPM 24:0 / SPM 20:1     | unclassified | -0.2284 | 0.0596 | 1.28E-04 |
| 19q13.32 | APOE | rs7259004 | SPM 24:0 / SPM 22:2     | unclassified | -1.9880 | 1.7405 | 2.53E-01 |
| 19q13.32 | APOE | rs7259004 | SPM 24:0 / SPM 22:1     | unclassified | -0.0388 | 0.0115 | 7.53E-04 |
| 19q13.32 | APOE | rs7259004 | SPM 24:0 / SPM dih 22:0 | unclassified | 1.6482  | 2.1440 | 4.42E-01 |
| 19q13.32 | APOE | rs7259004 | SPM 24:0 / SPM 23:1     | unclassified | -0.0899 | 0.0275 | 1.06E-03 |
| 19q13.32 | APOE | rs7259004 | SPM 24:0 / SPM dih 23:0 | unclassified | -4.9578 | 2.8577 | 8.28E-02 |
| 19q13.32 | APOE | rs7259004 | SPM 24:0 / SPM dih 24:0 | unclassified | 0.3069  | 3.3308 | 9.27E-01 |
