# Supplementary material for: Genome-Wide Association Study Identifies Novel Loci Associated with Circulating Phospho- and Sphingolipid Concentrations
Source: PubMed Central journal article supplement (PMC3280968; doi:10.1371/journal.pgen.1002490), 2012-02-16
Supplement: pgen.1002490.s009.pdf [file pgen.1002490.s009.pdf]

Table S3

GWAS of standard plasma lipid measures in EUROSPAN  
consortium

|              | SNP        | Chromosomal region | Allele1 | Allele2 | Effect | StdErr | P-value | Gene region |
|--------------|------------|--------------------|---------|---------|--------|--------|---------|-------------|
| <b>HDL-C</b> | rs7205804  | 16q13              | a       | g       | 0.06   | 0.01   | 8.5E-20 | CETP        |
|              | rs1532624  | 16q13              | a       | c       | 0.06   | 0.01   | 8.6E-20 | CETP        |
|              | rs11508026 | 16q13              | t       | c       | 0.06   | 0.01   | 2.4E-19 | CETP        |
|              | rs711752   | 16q13              | a       | g       | 0.06   | 0.01   | 6.5E-19 | CETP        |
|              | rs3764261  | 16q13              | a       | c       | 0.05   | 0.01   | 6.9E-17 | CETP        |
|              | rs247616   | 16q13              | t       | c       | 0.05   | 0.01   | 7.8E-17 | CETP        |
|              | rs173539   | 16q13              | t       | c       | 0.05   | 0.01   | 8.5E-17 | CETP        |
|              | rs1800775  | 16q13              | a       | c       | 0.06   | 0.01   | 9.2E-17 | CETP        |
|              | rs1864163  | 16q13              | a       | g       | -0.06  | 0.01   | 1.7E-12 | CETP        |
|              | rs9926440  | 16q13              | c       | g       | -0.06  | 0.01   | 1.8E-12 | CETP        |
|              | rs9929488  | 16q13              | c       | g       | -0.06  | 0.01   | 1.2E-11 | CETP        |
|              | rs12708967 | 16q13              | t       | c       | 0.06   | 0.01   | 8.0E-11 | CETP        |
|              | rs9939224  | 16q13              | t       | g       | -0.05  | 0.01   | 7.3E-09 | CETP        |
|              | rs11076175 | 16q13              | a       | g       | 0.05   | 0.01   | 1.1E-08 | CETP        |
|              | rs7499892  | 16q13              | t       | c       | -0.05  | 0.01   | 1.2E-08 | CETP        |
|              | rs7203984  | 16q13              | a       | c       | 0.05   | 0.01   | 3.7E-08 | CETP        |
| <b>LDL-C</b> | rs445925   | 19q13              | a       | g       | -0.43  | 0.04   | 9.2E-26 | APOE        |
|              | rs7259004  | 19q13              | c       | g       | -0.56  | 0.07   | 3.2E-16 | APOE        |
|              | rs7254892  | 19q13              | a       | g       | -0.55  | 0.08   | 5.3E-13 | APOE        |
|              | rs1531517  | 19q13              | a       | g       | -0.35  | 0.06   | 1.4E-09 | APOE        |
|              | rs4420638  | 19q13              | a       | g       | -0.23  | 0.04   | 2.6E-09 | APOE        |
|              | rs4803750  | 19q13              | a       | g       | 0.33   | 0.06   | 6.4E-09 | APOE        |
| <b>TG</b>    | rs2232662  | 10q24              | t       | c       | 5.50   | 0.87   | 2.7E-10 | PDCD11      |
|              | rs964184   | 11q23              | c       | g       | -0.16  | 0.03   | 1.6E-08 | APOA5       |
| <b>TC</b>    | rs445925   | 19q13              | a       | g       | -0.29  | 0.04   | 4.6E-11 | APOE        |
|              | rs7259004  | 19q13              | c       | g       | -0.41  | 0.07   | 3.9E-08 | APOE        |
