# Supplementary material for: Genome-Wide Association Study Identifies Novel Loci Associated with Circulating Phospho- and Sphingolipid Concentrations
Source: PubMed Central journal article supplement (PMC3280968; doi:10.1371/journal.pgen.1002490), 2012-02-16
Supplement: pgen.1002490.s010.pdf [file pgen.1002490.s010.pdf]

Table S4

Conditional analysis of the genome-wide significant loci.

| Lipid           | MarkerName | Original analysis |        |          | Adjusted by | Conditional analysis |        |          |
|-----------------|------------|-------------------|--------|----------|-------------|----------------------|--------|----------|
|                 |            | Effect            | StdErr | P-value  |             | Effect               | StdErr | P-value  |
| %LPC 20:3       | rs4500751  | -0.0005           | 0.0001 | 5.59E-23 | HDL-C       | -0.0005              | 0.0001 | 6.29E-23 |
| %LPC 20:3       | rs4500751  |                   |        |          | LDL-C       | -0.0005              | 0.0001 | 2.98E-23 |
| %LPC 20:3       | rs4500751  |                   |        |          | TC          | -0.0005              | 0.0001 | 9.26E-23 |
| %LPC 20:3       | rs4500751  |                   |        |          | TG          | -0.0005              | 0.0001 | 2.05E-23 |
| %LPC 16:1       | rs603424   | -0.0005           | 0.0001 | 6.41E-14 | HDL-C       | -0.0005              | 0.0001 | 1.95E-13 |
| %LPC 16:1       | rs603424   |                   |        |          | LDL-C       | -0.0005              | 0.0001 | 8.48E-14 |
| %LPC 16:1       | rs603424   |                   |        |          | TC          | -0.0005              | 0.0001 | 1.48E-13 |
| %LPC 16:1       | rs603424   |                   |        |          | TG          | -0.0005              | 0.0001 | 4.97E-14 |
| %LPC 18:0       | rs9437689  | 0.0028            | 0.0005 | 4.92E-08 | HDL-C       | 0.0029               | 0.0005 | 4.32E-08 |
| %LPC 18:0       | rs9437689  |                   |        |          | LDL-C       | 0.0029               | 0.0005 | 9.47E-09 |
| %LPC 18:0       | rs9437689  |                   |        |          | TC          | 0.0029               | 0.0005 | 1.20E-08 |
| %LPC 18:0       | rs9437689  |                   |        |          | TG          | 0.003                | 0.0005 | 1.44E-08 |
| % Saturated LPC | rs9932186  | -0.0068           | 0.0012 | 3.33E-08 | HDL-C       | -0.006               | 0.0012 | 4.01E-07 |
| % Saturated LPC | rs9932186  |                   |        |          | LDL-C       | -0.0064              | 0.0012 | 7.16E-08 |
| % Saturated LPC | rs9932186  |                   |        |          | TC          | -0.0063              | 0.0012 | 1.52E-07 |
| % Saturated LPC | rs9932186  |                   |        |          | TG          | -0.0057              | 0.0012 | 8.17E-07 |
| PC 34:4         | rs4666002  | 0.1366            | 0.021  | 7.48E-11 | HDL-C       | 0.1295               | 0.0208 | 4.79E-10 |
| PC 34:4         | rs4666002  |                   |        |          | LDL-C       | 0.1409               | 0.0206 | 8.65E-12 |
| PC 34:4         | rs4666002  |                   |        |          | TC          | 0.1238               | 0.0197 | 3.15E-10 |
| PC 34:4         | rs4666002  |                   |        |          | TG          | 0.1079               | 0.0198 | 5.24E-08 |
| PC 30:1         | rs870288   | -0.1495           | 0.026  | 9.57E-09 | HDL-C       | -0.137               | 0.0267 | 2.86E-07 |
| PC 30:1         | rs870288   |                   |        |          | LDL-C       | -0.1434              | 0.0267 | 7.53E-08 |
| PC 30:1         | rs870288   |                   |        |          | TC          | -0.1331              | 0.0267 | 6.02E-07 |
| PC 30:1         | rs870288   |                   |        |          | TG          | -0.1421              | 0.0266 | 8.83E-08 |
| PC O 32:1       | rs1077989  | 0.1675            | 0.0195 | 9.29E-18 | HDL-C       | 0.1532               | 0.0186 | 1.62E-16 |
| PC O 32:1       | rs1077989  |                   |        |          | LDL-C       | 0.1567               | 0.0191 | 2.74E-16 |
| PC O 32:1       | rs1077989  |                   |        |          | TC          | 0.1585               | 0.0185 | 8.84E-18 |
| PC O 32:1       | rs1077989  |                   |        |          | TG          | 0.1599               | 0.0199 | 1.02E-15 |
| PC 40:3         | rs12472274 | 0.1548            | 0.0273 | 1.52E-08 | HDL-C       | 0.153                | 0.0278 | 3.78E-08 |
| PC 40:3         | rs12472274 |                   |        |          | LDL-C       | 0.1522               | 0.028  | 5.19E-08 |
| PC 40:3         | rs12472274 |                   |        |          | TC          | 0.1581               | 0.0278 | 1.25E-08 |
| PC 40:3         | rs12472274 |                   |        |          | TG          | 0.1529               | 0.0277 | 3.38E-08 |
| PC O 42:6       | rs10769780 | 0.0551            | 0.01   | 3.31E-08 | HDL-C       | 0.0464               | 0.0099 | 2.86E-06 |
| PC O 42:6       | rs10769780 |                   |        |          | LDL-C       | 0.0515               | 0.01   | 2.86E-07 |
| PC O 42:6       | rs10769780 |                   |        |          | TC          | 0.0469               | 0.0099 | 2.12E-06 |

|            |            |          |        |           |       |          |         |           |
|------------|------------|----------|--------|-----------|-------|----------|---------|-----------|
| PC O 42:6  | rs10769780 |          |        |           | TG    | 0.0545   | 0.0101  | 6.76E-08  |
| PC O 42:6  | rs12423247 | -0.1963  | 0.0355 | 3.09E-08  | HDL-C | -0.2048  | 0.035   | 4.85E-09  |
| PC O 42:6  | rs12423247 |          |        |           | LDL-C | -0.1949  | 0.0355  | 4.09E-08  |
| PC O 42:6  | rs12423247 |          |        |           | TC    | -0.1900  | 0.035   | 5.86E-08  |
| PC O 42:6  | rs12423247 |          |        |           | TG    | -0.1991  | 0.0357  | 2.50E-08  |
| PC O 42:5  | rs17148090 | -0.1303  | 0.0237 | 4.14E-08  | HDL-C | -0.1138  | 0.0233  | 1.06E-06  |
| PC O 42:5  | rs17148090 |          |        |           | LDL-C | -0.1213  | 0.0238  | 3.40E-07  |
| PC O 42:5  | rs17148090 |          |        |           | TC    | -0.1216  | 0.0235  | 2.30E-07  |
| PC O 42:5  | rs17148090 |          |        |           | TG    | -0.1236  | 0.0239  | 2.22E-07  |
| PC O 42:5  | rs17718828 | 0.1136   | 0.0201 | 1.49E-08  | HDL-C | 0.1031   | 0.0197  | 1.68E-07  |
| PC O 42:5  | rs17718828 |          |        |           | LDL-C | 0.1138   | 0.02    | 1.29E-08  |
| PC O 42:5  | rs17718828 |          |        |           | TC    | 0.1224   | 0.0224  | 4.81E-08  |
| PC O 42:5  | rs17718828 |          |        |           | TG    | 0.1106   | 0.0201  | 3.86E-08  |
| PC 32:1    | rs7337573  | -58.4035 | 10.464 | 2.39E-08  | HDL-C | -57.8278 | 10.2457 | 1.66E-08  |
| PC 32:1    | rs7337573  |          |        |           | LDL-C | -57.7103 | 10.278  | 1.97E-08  |
| PC 32:1    | rs7337573  |          |        |           | TC    | -57.6265 | 9.977   | 7.65E-09  |
| PC 32:1    | rs7337573  |          |        |           | TG    | -58.4546 | 9.3558  | 4.16E-10  |
| PC/LPC     | rs10404486 | -0.8825  | 0.1533 | 8.53E-09  | HDL-C | -0.8354  | 0.1527  | 4.44E-08  |
| PC/LPC     | rs10404486 |          |        |           | LDL-C | -0.8685  | 0.1541  | 1.76E-08  |
| PC/LPC     | rs10404486 |          |        |           | TC    | -0.852   | 0.1527  | 2.39E-08  |
| PC/LPC     | rs10404486 |          |        |           | TG    | -0.8547  | 0.1521  | 1.92E-08  |
| %PC O 36:5 | rs1424760  | -0.0002  | 0      | 4.11E-08  | HDL-C | -0.0002  | <0.0001 | 1.30E-07  |
| %PC O 36:5 | rs1424760  |          |        |           | LDL-C | -0.0002  | <0.0001 | 1.04E-07  |
| %PC O 36:5 | rs1424760  |          |        |           | TC    | -0.0002  | <0.0001 | 8.20E-08  |
| %PC O 36:5 | rs1424760  |          |        |           | TG    | -0.0002  | <0.0001 | 1.65E-07  |
| %PC 26:0   | rs2945816  | -0.8873  | 0.1584 | 2.15E-08  | HDL-C | -0.891   | 0.1612  | 3.23E-08  |
| %PC 26:0   | rs2945816  |          |        |           | LDL-C | -0.8751  | 0.1612  | 5.67E-08  |
| %PC 26:0   | rs2945816  |          |        |           | TC    | -0.8663  | 0.1613  | 7.77E-08  |
| %PC 26:0   | rs2945816  |          |        |           | TG    | -0.8764  | 0.1612  | 5.45E-08  |
| %PC 36:4   | rs102275   | 0.0117   | 0.0001 | 9.88E-204 | HDL-C | 0.0117   | 0.0004  | 1.23E-197 |
| %PC 36:4   | rs102275   |          |        |           | LDL-C | 0.0118   | 0.0004  | 7.99E-201 |
| %PC 36:4   | rs102275   |          |        |           | TC    | 0.0118   | 0.0004  | 1.61E-200 |
| %PC 36:4   | rs102275   |          |        |           | TG    | 0.0118   | 0.0004  | 1.11E-200 |
| %PC 36:1   | rs10885997 | -0.0006  | 0.0001 | 7.88E-09  | HDL-C | -0.0006  | 0.0001  | 2.66E-08  |
| %PC 36:1   | rs10885997 |          |        |           | LDL-C | -0.0005  | 0.0001  | 7.21E-08  |
| %PC 36:1   | rs10885997 |          |        |           | TC    | -0.0005  | 0.0001  | 4.43E-08  |
| %PC 36:1   | rs10885997 |          |        |           | TG    | -0.0006  | 0.0001  | 2.66E-08  |
| %PC 38:5   | rs17606561 | 0.001    | 0.0002 | 1.49E-11  | HDL-C | 0.001    | 0.0002  | 1.27E-10  |
| %PC 38:5   | rs17606561 |          |        |           | LDL-C | 0.001    | 0.0002  | 1.32E-10  |
| %PC 38:5   | rs17606561 |          |        |           | TC    | 0.001    | 0.0002  | 6.73E-11  |
| %PC 38:5   | rs17606561 |          |        |           | TG    | 0.001    | 0.0002  | 8.07E-11  |

|                     |            |         |        |          |       |         |         |          |
|---------------------|------------|---------|--------|----------|-------|---------|---------|----------|
| %PC O 32:0          | rs964184   | 0.0001  | 0.0229 | 2.82E-08 | HDL-C | 0.0001  | <0.0001 | 5.16E-10 |
| %PC O 32:0          | rs964184   |         |        |          | LDL-C | 0.0001  | <0.0001 | 1.22E-10 |
| %PC O 32:0          | rs964184   |         |        |          | TC    | 0.0001  | <0.0001 | 4.05E-10 |
| %PC O 32:0          | rs964184   |         |        |          | TG    | 0.0001  | <0.0001 | 6.51E-06 |
| %PC 32:2            | rs11662721 | -0.0001 | 0      | 1.36E-08 | HDL-C | 0.0001  | <0.0001 | 6.58E-09 |
| %PC 32:2            | rs11662721 |         |        |          | LDL-C | 0.0001  | <0.0001 | 2.90E-08 |
| %PC 32:2            | rs11662721 |         |        |          | TC    | 0.0001  | <0.0001 | 1.33E-08 |
| %PC 32:2            | rs11662721 |         |        |          | TG    | 0.0001  | <0.0001 | 2.93E-08 |
| %PC 32:0            | rs1061808  | -0.0002 | 0      | 7.78E-10 | HDL-C | -0.0002 | <0.0001 | 2.47E-09 |
| %PC 32:0            | rs1061808  |         |        |          | LDL-C | -0.0002 | <0.0001 | 9.76E-10 |
| %PC 32:0            | rs1061808  |         |        |          | TC    | -0.0002 | <0.0001 | 1.77E-09 |
| %PC 32:0            | rs1061808  |         |        |          | TG    | -0.0002 | <0.0001 | 3.47E-09 |
| PE 36:4             | rs10468017 | 0.3944  | 0.0287 | 6.59E-43 | HDL-C | 0.38    | 0.0291  | 5.43E-39 |
| PE 36:4             | rs10468017 |         |        |          | LDL-C | 0.4012  | 0.0291  | 3.62E-43 |
| PE 36:4             | rs10468017 |         |        |          | TC    | 0.3979  | 0.0291  | 1.30E-42 |
| PE 36:4             | rs10468017 |         |        |          | TG    | 0.4415  | 0.0291  | 6.22E-52 |
| %Monounsaturated PE | rs9832727  | -0.0062 | 0.0006 | 5.88E-29 | HDL-C | -0.0062 | 0.0006  | 8.96E-28 |
| %Monounsaturated PE | rs9832727  |         |        |          | LDL-C | -0.0063 | 0.0006  | 3.51E-28 |
| %Monounsaturated PE | rs9832727  |         |        |          | TC    | -0.0063 | 0.0006  | 3.13E-28 |
| %Monounsaturated PE | rs9832727  |         |        |          | TG    | -0.0062 | 0.0006  | 6.74E-29 |
| PLPE 18:0/22:6      | rs197770   | -0.2504 | 0.0446 | 1.95E-08 | HDL-C | -0.2361 | 0.0436  | 6.16E-08 |
| PLPE 18:0/22:6      | rs197770   |         |        |          | LDL-C | -0.229  | 0.0442  | 2.19E-07 |
| PLPE 18:0/22:6      | rs197770   |         |        |          | TC    | -0.2204 | 0.0431  | 3.24E-07 |
| PLPE 18:0/22:6      | rs197770   |         |        |          | TG    | -0.238  | 0.0452  | 1.37E-07 |
| Glu-CER 16:0        | rs13106975 | -0.228  | 0.029  | 4.15E-15 | HDL-C | -0.032  | 0.0037  | 2.08E-18 |
| Glu-CER 16:0        | rs13106975 |         |        |          | LDL-C | -0.0322 | 0.0033  | 1.91E-22 |
| Glu-CER 16:0        | rs13106975 |         |        |          | TC    | -0.0334 | 0.0033  | 6.62E-24 |
| Glu-CER 16:0        | rs13106975 |         |        |          | TG    | -0.032  | 0.0037  | 3.36E-18 |
| CER 16:0            | rs680379   | -0.1989 | 0.0241 | 1.61E-16 | HDL-C | -0.1912 | 0.0246  | 7.32E-15 |
| CER 16:0            | rs680379   |         |        |          | LDL-C | -0.1891 | 0.0245  | 1.16E-14 |
| CER 16:0            | rs680379   |         |        |          | TC    | -0.1864 | 0.0244  | 2.22E-14 |
| CER 16:0            | rs680379   |         |        |          | TG    | -0.1976 | 0.0244  | 5.45E-16 |
| CER 18:0            | rs2304130  | -0.0015 | 0.0003 | 5.85E-09 | HDL-C | -0.0014 | 0.0003  | 3.80E-08 |
| CER 18:0            | rs2304130  |         |        |          | LDL-C | -0.0014 | 0.0003  | 2.76E-08 |
| CER 18:0            | rs2304130  |         |        |          | TC    | -0.0013 | 0.0003  | 1.24E-07 |
| CER 18:0            | rs2304130  |         |        |          | TG    | -0.0015 | 0.0003  | 1.17E-08 |
| Glu-CER 24:1        | rs4485401  | 0.1467  | 0.026  | 1.60E-08 | HDL-C | 0.1437  | 0.0264  | 4.94E-08 |
| Glu-CER 24:1        | rs4485401  |         |        |          | LDL-C | 0.1442  | 0.0264  | 4.55E-08 |
| Glu-CER 24:1        | rs4485401  |         |        |          | TC    | 0.1416  | 0.0263  | 7.73E-08 |
| Glu-CER 24:1        | rs4485401  |         |        |          | TG    | 0.1411  | 0.0225  | 3.71E-10 |
| SPM 22:0            | rs7259004  | -4.1912 | 0.6735 | 4.89E-10 | HDL-C | -4.4372 | 0.6686  | 3.21E-11 |

|          |            |         |        |          |       |         |        |          |
|----------|------------|---------|--------|----------|-------|---------|--------|----------|
| SPM 22:0 | rs7259004  |         |        |          | LDL-C | -0.7022 | 0.5473 | 0.1995   |
| SPM 22:0 | rs7259004  |         |        |          | TC    | -1.7392 | 0.5297 | 0.001025 |
| SPM 22:0 | rs7259004  |         |        |          | TG    | -4.0973 | 0.6792 | 1.62E-09 |
| SPM 23:0 | rs12051548 | -2.0175 | 0.3319 | 1.21E-09 | HDL-C | -2.0798 | 0.3237 | 1.32E-10 |
| SPM 23:0 | rs12051548 |         |        |          | LDL-C | -1.9746 | 0.2629 | 5.92E-14 |
| SPM 23:0 | rs12051548 |         |        |          | TC    | -1.7828 | 0.2487 | 7.60E-13 |
| SPM 23:0 | rs12051548 |         |        |          | TG    | -2.1163 | 0.3324 | 1.94E-10 |
| SPM 16:1 | rs174479   | 1.2149  | 0.1588 | 1.99E-14 | HDL-C | 1.1147  | 0.1522 | 2.40E-13 |
| SPM 16:1 | rs174479   |         |        |          | LDL-C | 1.0415  | 0.1347 | 1.04E-14 |
| SPM 16:1 | rs174479   |         |        |          | TC    | 0.9822  | 0.1232 | 1.57E-15 |
| SPM 16:1 | rs174479   |         |        |          | TG    | 1.1913  | 0.1594 | 7.83E-14 |
| SPM 17:0 | rs1566039  | 0.1813  | 0.0317 | 1.09E-08 | HDL-C | 0.1808  | 0.0315 | 9.66E-09 |
| SPM 17:0 | rs1566039  |         |        |          | LDL-C | 0.1326  | 0.0289 | 4.49E-06 |
| SPM 17:0 | rs1566039  |         |        |          | TC    | 0.1211  | 0.0282 | 1.77E-05 |
| SPM 17:0 | rs1566039  |         |        |          | TG    | 0.1901  | 0.0323 | 3.91E-09 |
| SPM 20:1 | rs7258249  | 0.2899  | 0.0236 | 1.09E-34 | HDL-C | 0.2844  | 0.0241 | 4.30E-32 |
| SPM 20:1 | rs7258249  |         |        |          | LDL-C | 0.2833  | 0.0241 | 7.32E-32 |
| SPM 20:1 | rs7258249  |         |        |          | TC    | 0.283   | 0.0241 | 8.30E-32 |
| SPM 20:1 | rs7258249  |         |        |          | TG    | 0.2825  | 0.0241 | 9.19E-32 |
| SPM 14:0 | rs17101394 | 0.0027  | 0.0002 | 3.10E-57 | HDL-C | 0.0028  | 0.0002 | 2.70E-59 |
| SPM 14:0 | rs17101394 |         |        |          | LDL-C | 0.0028  | 0.0002 | 1.30E-58 |
| SPM 14:0 | rs17101394 |         |        |          | TC    | 0.0028  | 0.0002 | 2.75E-59 |
| SPM 14:0 | rs17101394 |         |        |          | TG    | 0.0028  | 0.0002 | 2.00E-57 |
