# Supplementary material for: Genome-Wide Association Study Identifies Novel Loci Associated with Circulating Phospho- and Sphingolipid Concentrations
Source: PubMed Central journal article supplement (PMC3280968; doi:10.1371/journal.pgen.1002490), 2012-02-16
Supplement: pgen.1002490.s011.pdf [file pgen.1002490.s011.pdf]

Table S5

ConsensusPathDB pathway enrichment for phospholipid related loci<sup>+</sup>

| Pathway name                                 | Pathway size | Number of candidate genes | <i>P</i> -value | Corrected <i>P</i> -value * | Pathway source |
|----------------------------------------------|--------------|---------------------------|-----------------|-----------------------------|----------------|
| Fat digestion and absorption                 | 45           | 3 (6.7%)                  | 0.00021         | 0.0022                      | KEGG           |
| Lipid digestion, mobilization, and transport | 48           | 3 (6.2%)                  | 0.00026         | 0.0022                      | Reactome       |
| Glycerolipid metabolism                      | 54           | 3 (5.6%)                  | 0.00037         | 0.0022                      | KEGG           |
| Glycerolipid Metabolism                      | 12           | 2 (16.7%)                 | 0.00044         | 0.0022                      | SMPDB          |
| Metabolism of lipids and lipoproteins        | 269          | 5 (1.9%)                  | 0.00056         | 0.0022                      | Reactome       |
| triacylglycerol degradation                  | 16           | 2 (14.3%)                 | 0.00060         | 0.0022                      | HumanCyc       |
| Chylomicron-mediated lipid transport         | 17           | 2 (11.8%)                 | 0.00089         | 0.0028                      | Reactome       |
| Statin Pathway, Pharmacodynamics             | 25           | 2 (8.3%)                  | 0.0018          | 0.0044                      | PharmGKB       |
| Triacylglyceride Synthesis                   | 24           | 2 (8.3%)                  | 0.0018          | 0.0044                      | Wikipathways   |
| Statin Pathway                               | 31           | 2 (6.9%)                  | 0.0026          | 0.0051                      | Wikipathways   |
| Lipoprotein metabolism                       | 29           | 2 (6.9%)                  | 0.0026          | 0.0051                      | Reactome       |
| Biosynthesis of the N-glycan precursor       | 30           | 2 (6.7%)                  | 0.0028          | 0.0051                      | Reactome       |
| Glycerophospholipid metabolism               | 113          | 3 (2.7%)                  | 0.0031          | 0.0053                      | EHMN           |
| Triglyceride Biosynthesis                    | 35           | 2 (5.9%)                  | 0.0036          | 0.0055                      | Reactome       |
| N-Glycan biosynthesis                        | 35           | 2 (5.7%)                  | 0.0038          | 0.0055                      | KEGG           |
| N-Glycan biosynthesis                        | 41           | 2 (4.9%)                  | 0.0052          | 0.0071                      | EHMN           |
