# Supplementary material for: Genome-Wide Association Study Identifies Novel Loci Associated with Circulating Phospho- and Sphingolipid Concentrations
Source: PubMed Central journal article supplement (PMC3280968; doi:10.1371/journal.pgen.1002490), 2012-02-16
Supplement: pgen.1002490.s012.pdf [file pgen.1002490.s012.pdf]

Table S6

ConsensusPathDB pathway enrichment for sphingolipid related loci<sup>+</sup>

| Pathway name                          | Pathway size | Number of candidate genes | <i>P</i> -value        | Corrected <i>P</i> -value * | Pathway source |
|---------------------------------------|--------------|---------------------------|------------------------|-----------------------------|----------------|
| Metabolism of lipids and lipoproteins | 269          | 5 (1.9%)                  | 3.7 x 10 <sup>-6</sup> | 1.0 x 10 <sup>-5</sup>      | Reactome       |
| Sphingolipid metabolism               | 32           | 3 (9.4%)                  | 4.1 x 10 <sup>-6</sup> | 1.0 x 10 <sup>-5</sup>      | Reactome       |
| Sphingolipid Metabolism               | 43           | 2 (10.0%)                 | 0.00019                | 0.00031                     | Wiki pathways  |
| LPA receptor mediated events          | 67           | 2 (3.2%)                  | 0.0019                 | 0.0024                      | PID            |
