# Supplementary material for: Genome-Wide Association Study Identifies Novel Loci Associated with Circulating Phospho- and Sphingolipid Concentrations
Source: PubMed Central journal article supplement (PMC3280968; doi:10.1371/journal.pgen.1002490), 2012-02-16
Supplement: pgen.1002490.s013.pdf [file pgen.1002490.s013.pdf]

Table S7

## Association to IMT

| SNP        | Chromosome |           | Risk allele | Effect | seEffect | P-value  |
|------------|------------|-----------|-------------|--------|----------|----------|
| rs9437689  | 1          | ALG14     | T           | -0.001 | 0.002    | 7.34E-01 |
| rs12472274 | 2          | ILKAP     | A           | 0.001  | 0.002    | 5.45E-01 |
| rs1424760  | 2          | KCNH7     | T           | -0.002 | 0.002    | 3.39E-01 |
| rs4666002  | 2          | GCKR      | C           | 0.001  | 0.002    | 7.35E-01 |
| rs197770   | 3          | ITGA9     | A           | 0.001  | 0.002    | 8.31E-01 |
| rs9832727  | 3          | PAQR9     | C           | 0.003  | 0.002    | 8.42E-02 |
| rs13106975 | 4          | ATP10D    | T           | 0.000  | 0.002    | 9.06E-01 |
| rs1566039  | 5          | PAPD7     | A           | -0.001 | 0.002    | 7.78E-01 |
| rs1061808  | 6          | AGPAT1    | T           | -0.001 | 0.002    | 3.79E-01 |
| rs17606561 | 6          | ELOVL2    | A           | 0.003  | 0.002    | 8.01E-02 |
| rs10885997 | 10         | PNLIPRP2  | A           | -0.002 | 0.002    | 2.87E-01 |
| rs603424   | 10         | PKD2L1    | A           | 0.003  | 0.002    | 1.05E-01 |
| rs102275   | 11         | FADS1-2-3 | T           | 0.005  | 0.002    | 7.20E-04 |
| rs10769780 | 11         | SYT9      | T           | 0.001  | 0.002    | 6.62E-01 |
| rs17148090 | 11         | DLG2      | A           | -0.002 | 0.003    | 5.84E-01 |
| rs174479   | 11         | FADS1-2-3 | C           | 0.000  | 0.002    | 8.30E-01 |
| rs964184   | 11         | APOA1-5   | C           | -0.003 | 0.002    | 1.42E-01 |
| rs12423247 | 12         | CDK17     | A           | 0.008  | 0.004    | 5.34E-02 |
| rs17718828 | 13         | KLF12     | T           | 0.001  | 0.003    | 6.39E-01 |
| rs1077989  | 14         | PLEKHH1   | A           | 0.001  | 0.002    | 3.49E-01 |
| rs17101394 | 14         | SGPP1     | A           | -0.002 | 0.002    | 3.41E-01 |
| rs10468017 | 15         | LIPC      | T           | -0.002 | 0.002    | 1.86E-01 |
| rs4485401  | 16         | CNTNAP4   | A           | 0.001  | 0.002    | 6.47E-01 |
| rs4500751  | 16         | PDXDC1    | T           | -0.002 | 0.002    | 2.48E-01 |
| rs870288   | 16         | ALG1      | A           | 0.001  | 0.002    | 5.38E-01 |
| rs9932186  | 16         | CDH8      | T           | -0.004 | 0.002    | 2.95E-02 |
| rs12051548 | 17         | PLD2      | C           | -0.011 | 0.006    | 7.31E-02 |
| rs11662721 | 18         | ABHD3     | T           | -0.003 | 0.002    | 1.17E-01 |
| rs10404486 | 19         | ZNF600    | T           | -0.002 | 0.003    | 4.77E-01 |
| rs2304130  | 19         | LPAR2     | A           | 0.000  | 0.003    | 9.13E-01 |
| rs7258249  | 19         | LASS4     | A           | 0.003  | 0.002    | 1.17E-01 |
| rs7259004  | 19         | APOE      | C           | -0.009 | 0.005    | 5.41E-02 |
| rs680379   | 20         | SPTLC3    | A           | -0.002 | 0.002    | 1.03E-01 |
