# Supplementary material for: Genome-Wide Association Study Identifies Novel Loci Associated with Circulating Phospho- and Sphingolipid Concentrations
Source: PubMed Central journal article supplement (PMC3280968; doi:10.1371/journal.pgen.1002490), 2012-02-16
Supplement: pgen.1002490.s014.pdf [file pgen.1002490.s014.pdf]

Table S8

## Association to type 2 diabetes risk

| SNP        | Chromosome | Gene region | Risk allele | P-value  | Odds Ratio | 95 % CI   |
|------------|------------|-------------|-------------|----------|------------|-----------|
| rs9437689  | 1          | ALG14       | T           | 2.33E-01 | 1.02       | 0.98-1.07 |
| rs12472274 | 2          | ILKAP       | G           | 4.52E-01 | 1.02       | 0.97-1.07 |
| rs1424760  | 2          | KCNH7       | C           | 1.91E-01 | 1.03       | 0.99-1.08 |
| rs4666002  | 2          | GCKR        | C           | 2.90E-01 | 1.02       | 0.98-1.07 |
| rs197770   | 3          | ITGA9       | G           | 8.59E-01 | 1.01       | 0.95-1.07 |
| rs9832727  | 3          | PAQR9       | G           | 1.92E-01 | 1.03       | 0.98-1.08 |
| rs13106975 | 4          | ATP10D      | G           | 8.32E-02 | 1.04       | 0.99-1.09 |
| rs1566039  | 5          | PAPD7       | G           | 6.01E-01 | 1.01       | 0.97-1.06 |
| rs1061808  | 6          | AGPAT1      | G           | 2.58E-03 | 1.07       | 1.02-1.11 |
| rs17606561 | 6          | ELOVL2      | A           | 9.29E-01 | 1.00       | 0.95-1.05 |
| rs10885997 | 10         | PNLIPRP2    | G           | 2.12E-01 | 1.03       | 0.98-1.07 |
| rs603424   | 10         | PKD2L1      | A           | 1.00E+00 | 1.00       | 0.94-1.06 |
| rs102275   | 11         | FADS 1-2-3  | T           | 2.04E-02 | 1.05       | 1.01-1.09 |
| rs10769780 | 11         | SYT9        | T           | 6.07E-01 | 1.01       | 0.96-1.07 |
| rs17148090 | 11         | DLG2        | A           | 4.64E-01 | 1.03       | 0.95-1.12 |
| rs174479   | 11         | FADS 1-2-3  | C           | 5.25E-03 | 1.09       | 1.02-1.15 |
| rs964184   | 11         | APOA5       | G           | 1.05E-01 | 1.05       | 0.99-1.11 |
| rs12423247 | 12         | CDK17       | A           | 6.92E-01 | 1.03       | 0.90-1.17 |
| rs17718828 | 13         | KLF12       | C           | 2.66E-01 | 1.04       | 0.97-1.11 |
| rs1077989  | 14         | PLEKHH1     | C           | 8.19E-02 | 1.04       | 1.00-1.08 |
| rs17101394 | 14         | SGPP1       | A           | 3.57E-01 | 1.03       | 0.97-1.09 |
| rs10468017 | 15         | LIPC        | C           | 1.44E-01 | 1.04       | 0.99-1.08 |
| rs4485401  | 16         | CNTNAP4     | G           | 2.95E-01 | 1.02       | 0.98-1.07 |
| rs4500751  | 16         | PDXDC1      | C           | 5.38E-01 | 1.01       | 0.97-1.06 |
| rs870288   | 16         | ALG1        | G           | 6.27E-01 | 1.01       | 0.97-1.06 |
| rs9932186  | 16         | CDH8        | G           | 9.76E-02 | 1.05       | 0.99-1.10 |
| rs11662721 | 18         | ABHD3       | T           | 1.99E-01 | 1.03       | 0.98-1.09 |
| rs10404486 | 19         | ZNF600      | T           | 6.15E-01 | 1.02       | 0.94-1.10 |
| rs2304130  | 19         | LPAR2       | G           | 5.31E-02 | 1.08       | 1.00-1.17 |
| rs7258249  | 19         | LASS4       | A           | 3.29E-01 | 1.03       | 0.97-1.08 |
| rs680379   | 20         | SPTLC3      | A           | 9.50E-01 | 1.00       | 0.96-1.04 |
