# Supplementary material for: Genome-Wide Association Study Identifies Novel Loci Associated with Circulating Phospho- and Sphingolipid Concentrations
Source: PubMed Central journal article supplement (PMC3280968; doi:10.1371/journal.pgen.1002490), 2012-02-16
Supplement: pgen.1002490.s015.pdf [file pgen.1002490.s015.pdf]

Table S9

## Association to coronary artery disease risk

| SNP        | Chromosome | Gene region | Risk allele | <i>P</i> -value | Odds Ratio | 95 % CI   |
|------------|------------|-------------|-------------|-----------------|------------|-----------|
| rs9437689  | 1          | ALG14       | C           | 2.19E-01        | 1.02       | 0.99-1.05 |
| rs4666002  | 2          | GCKR        | C           | 4.77E-01        | 1.01       | 0.98-1.04 |
| rs12472274 | 2          | ILKAP       | G           | 8.98E-01        | 1.00       | 0.96-1.03 |
| rs1424760  | 2          | KCNH7       | C           | 7.84E-01        | 1.00       | 0.96-1.03 |
| rs197770   | 3          | ITGA9       | G           | 6.31E-01        | 1.01       | 0.97-1.06 |
| rs13106975 | 4          | ATP10D      | G           | 3.32E-01        | 0.98       | 0.95-1.02 |
| rs1566039  | 5          | PAPD7       | G           | 4.08E-01        | 1.01       | 0.98-1.05 |
| rs17606561 | 6          | ELOVL2      | G           | 9.00E-01        | 1.00       | 0.97-1.03 |
| rs1061808  | 6          | AGPAT1      | G           | 1.11E-01        | 1.02       | 0.99-1.06 |
| rs603424   | 10         | PKD2L1      | G           | 2.37E-02        | 0.95       | 0.91-0.99 |
| rs10885997 | 10         | PNLIPRP2    | G           | 9.61E-01        | 1.00       | 0.97-1.03 |
| rs102275   | 11         | FADS1-2-3   | C           | 6.41E-01        | 0.99       | 0.97-1.02 |
| rs964184   | 11         | APOA5       | C           | 8.02E-10        | 0.88       | 0.85-0.92 |
| rs17148090 | 11         | DLG2        | G           | 7.72E-01        | 0.99       | 0.94-1.05 |
| rs12423247 | 12         | CDK17       | T           | 3.63E-01        | 0.96       | 0.88-1.05 |
| rs17718828 | 13         | KLF12       | C           | 1.89E-01        | 1.04       | 0.98-1.09 |
| rs17101394 | 14         | SGPP1       | G           | 8.66E-01        | 1.00       | 0.96-1.05 |
| rs1077989  | 14         | PLEKHH1     | C           | 4.61E-01        | 0.99       | 0.96-1.02 |
| rs10468017 | 15         | LIPC        | C           | 5.21E-01        | 0.99       | 0.96-1.02 |
| rs4500751  | 16         | PDXDC1      | C           | 9.39E-01        | 1.00       | 0.97-1.03 |
| rs870288   | 16         | ALG1        | G           | 6.37E-01        | 1.01       | 0.98-1.04 |
| rs4485401  | 16         | CNTNAP4     | G           | 9.36E-01        | 1.00       | 0.97-1.03 |
| rs9932186  | 16         | CDH8        | G           | 2.89E-02        | 1.04       | 1.00-1.08 |
| rs11662721 | 18         | ABHD3       | C           | 4.51E-01        | 1.01       | 0.98-1.05 |
| rs10404486 | 19         | ZNF600      | C           | 3.99E-01        | 1.02       | 0.97-1.07 |
| rs680379   | 20         | SPTLC3      | G           | 7.87E-01        | 1.00       | 0.98-1.03 |
